# Supplementary material for: Genome Reduction in Tetraploid Potato Reveals Genetic Load, Haplotype Variation, and Loci Associated With Agronomic Traits
Source: Front Plant Sci. 2018 Jul 3;9:944. doi: 10.3389/fpls.2018.00944 (PMC6037889; doi:10.3389/fpls.2018.00944)
Supplement: Supplementary file 2 [file Table_2.xlsx]

## Sheet: Suppl Table 2
Supplementary Table 2. Single nucleotide polymorphic markers identified and mapped in the ‘Superior’ dihaploid mapping population. Location in the potato genome sequence assembly 4.03, pseudomolecule chromosome (PM_chr) and base pair position (bp pos). Genetic map position, chromosome (Chr) and centi-Morgan position (cM)
PM_Chr	bp pos	Chr	cM	Sequence
chr01	1522058	chr01	0.25	ATGCCTTTTTTAATACTCCTATTGGATTTACAAATAATCAAATTCATATCGCGTAAGTCACGTTAAAGAGAAAACATTTTCTAATCTCTATCAAGAGTTTC
chr01	1636140	chr01	0.25	CTATACAGTAATACAAACATACGTTAAGAAAAACTCAACCAAGTCTCTTACTCTGTCATCACTGTAAGCTAATAAACAAATAAGACTATTACTTTCAAAAG
chr01	1636153	chr01	0.25	CAAACATACGTTAAGAAAAACTCAACCAAGTCTCTTACTCTGTCATCACTGTAAGCTAATAAACAAATAAGACTATTACTTTCAAAAGCTAATATATTGAA
chr01	1757222	chr01	0.25	GCCCTCTGATCTTTTTATATACATTGATTACGAGTGATCTGATTGTATAAATATTTTTTTTATTGTGTAGGGGCACATACATTTGGAAGAGCAAGATGTAG
chr01	1513380	chr01	5.23	AGATCAACTATACAATCAAACAAAACAAAAAGACAAAACCTTTGAAAGCAAACTAATTACCTGTAGAACTTGTCTCAAAGATCCATTCTTCATACAAGAAT
chr01	1588550	chr01	5.23	AAAGTATGAAACAAAATTTAATCCAATAAGAAAAAATCTCAAACAGTTAAGAACTAATAATCAATATTAAAACTAAATCAGACCATTACCAAAACCGCTAA
chr01	1638527	chr01	5.23	CAGGTTCAAATTTCAACAGAGATAATAGTACGATATAATTTATTTTACATCTGTCATGTCCTAGCTTTAGTAGACAAACTAGATATTTGTTGTCAGAATTA
chr01	2447580	chr01	6.26	AAAATAATTTTGAGACAAAGGGAATATTTAATTACTTTTAAACTCTAAAAGTATAGCTTTTTCACAATTTTTATAATTAAAACGGACTACACAATGTTATG
chr01	2447581	chr01	6.26	AAATAATTTTGAGACAAAGGGAATATTTAATTACTTTTAAACTCTAAAAGTATAGCTTTTTCACAATTTTTATAATTAAAACGGACTACACAATGTTATGA
chr01	2447596	chr01	6.26	AAAGGGAATATTTAATTACTTTTAAACTCTAAAAGTATAGCTTTTTCACAATTTTTATAATTAAAACGGACTACACAATGTTATGAGTAAGGCATAAGCTG
chr01	3005872	chr01	8.33	TAGTTCTTGGAGTTTTGGTCTTTATTGTAGGTATGAAAATGCAAAGCATACTATATAATAAAATAATAGCAAAAAAAATGTTGCACTGAATGAAGTCTACT
chr01	3005892	chr01	8.33	TTTATTGTAGGTATGAAAATGCAAAGCATACTATATAATAAAATAATAGCAAAAAAAATGTTGCACTGAATGAAGTCTACTATGTGAACATAATTGACTAA
chr01	3021452	chr01	8.33	TTTTCCTTGTGACAAATCAACCATGCAGAAAAAGAAGAAAAGGGCTAAGCAAGAAGAAACACATTTGTTAATATAGATAACTTTGTATATTGAATATCTAT
chr01	3021461	chr01	8.33	TGACAAATCAACCATGCAGAAAAAGAAGAAAAGGGCTAAGCAAGAAGAAACACATTTGTTAATATAGATAACTTTGTATATTGAATATCTATATTTTCTTT
chr01	3034807	chr01	8.33	CTTTATTTTATTTTATTTTATATATTTTCAAATAATCATTTTGTTAAATAATTAACTTTTGTTAACTATAAGGACCAAGACCAATACATTTAAAATGATTG
chr01	3035072	chr01	8.33	TTATTGGAAAAAAATGTAGTCTATCGATTTTTTACATTTTTTTTAATAGTATTAACATGACGATCAAAGTTTGAAATAAAATTTTTGAATTATGCGGAACC
chr01	3035073	chr01	8.33	TATTGGAAAAAAATGTAGTCTATCGATTTTTTACATTTTTTTTAATAGTATTAACATGACGATCAAAGTTTGAAATAAAATTTTTGAATTATGCGGAACCC
chr01	3035311	chr01	8.33	TTCATTAGCTCAACTCATTTCAACCCATTAAAAATTGAGTTTATAAATAATCCGAATTGGCTCATGAAAATTTTGTCTAAATATTTTAATTTTTTTTGTTA
chr01	3035439	chr01	8.33	AAAGAAAACAAATTATTAGGTACTAAAATAGTTTAAAAGAACAAATAAAATAATTAAGTTTAGTAAAAATTGGGTTGGATGTAACCCATTTTGACCCAACC
chr01	3444480	chr01	8.33	TCCATATAGACTTCTATCTAAAGTCATGTCCTAGGTAAGTTAAAACTTATGTCATATCTTATCTAACCACCTCTCTCCAGTCTCCAATACTTCTTCTGTTC
chr01	3451219	chr01	8.33	ATATATTATGTCACGTTTGTGCTATTACACTATATTTGACGGTAATATAATTTTAAAATAATTTAAATATAATATATTTTTACATTAAGGAACAAAAACAC
chr01	3451227	chr01	8.33	TGTCACGTTTGTGCTATTACACTATATTTGACGGTAATATAATTTTAAAATAATTTAAATATAATATATTTTTACATTAAGGAACAAAAACACTTATCTTA
chr01	3451232	chr01	8.33	CGTTTGTGCTATTACACTATATTTGACGGTAATATAATTTTAAAATAATTTAAATATAATATATTTTTACATTAAGGAACAAAAACACTTATCTTATTAAT
chr01	3023476	chr01	8.35	CTTTTTTCAAATTTTGCACCATACAATTTGTGGCTAAACTACCCTTGTTAAAGGAGAGTCAGAAACATCTCTTCGTTCGAAAATTATACTATATAAATAGG
chr01	3035523	chr01	8.35	CCCATTTTGACCCAACCCGTTTTCACCCAAGCAAATTTAGTTTGGATTGGATGTTGACACGATTATTGTCTTAAACCCATTATAACCCGTCCAAATTTGAC
chr01	3038481	chr01	8.35	GGGAAAAAAAAAACAGGAATTAGCCCAACGGCTTAGCTATGAATTTGTGTCCGTCGTTAATATGCTCGTAGCTGTTAACTTTCTACAAATTGAACATGTTG
chr01	3044204	chr01	8.35	TGACATGAAAGATTATAAGAACCTTTAAATTCAAAAGCTTTAACATAATAATATCCATCATTTTTATAAAAAAAAATACTATGTAAATATAATTTTTATAA
chr01	3431434	chr01	8.35	GATATGTCAATATGAATATTTTATTGAGGCGACAACTAATGAGGTATTTACCAAGCTTTAGTAGCTCTTGCACTTTACCCCACTTTGTGGGACTACACTGG
chr01	3451392	chr01	8.35	AACATACCAAATTGATCCCATAAATGAAATTGAAAAAAAATAAAGTGTACCAGATGAAGAGGTTGTTTCCGATATAAATGATAATTATATATTACTATTTT
chr01	3451301	chr01	8.41	CATTAAGGAACAAAAACACTTATCTTATTAATTAAAATTATATATGATGAGTCACATATCGCAGAAATCAAAATCAGAACTTACCAATAATAACATACCAA
chr01	3451311	chr01	8.41	CAAAAACACTTATCTTATTAATTAAAATTATATATGATGAGTCACATATCGCAGAAATCAAAATCAGAACTTACCAATAATAACATACCAAATTGATCCCA
chr01	3451327	chr01	8.41	ATTAATTAAAATTATATATGATGAGTCACATATCGCAGAAATCAAAATCAGAACTTACCAATAATAACATACCAAATTGATCCCATAAATGAAATTGAAAA
chr01	2447585	chr01	8.61	AATTTTGAGACAAAGGGAATATTTAATTACTTTTAAACTCTAAAAGTATAGCTTTTTCACAATTTTTATAATTAAAACGGACTACACAATGTTATGAGTAA
chr01	2559482	chr01	8.61	CAACTCGCGTTTCGTATGCTTCCACTAGATACTGTTAAAAATCAAAAAGAAAATATAGTGAGGATTCATATAGTCGACCCGAACTTGTTGTAGATTGAAGC
chr01	2712242	chr01	8.61	ATGGACCTACAAAATTATGAAAATGATGTTTCAGAAAAGCTGCATAGATGTGTTTGTATGAGTTAGTCGCAGCAGGAATTTGAAGTTCTGAAAAACAAAAA
chr01	2744866	chr01	8.61	GTGATAGTGATTGGAGTCATTAACAATAGTGGTTGATGGTGGTGCAATTGGTGATATCAACGGATAACTAAAGGTGGATGATATGGTTTGCGATAGTAACG
chr01	4597619	chr01	8.76	GAACGAAATACAAGTGTGACCAGGCAAATGGAAAAAATAACCAGGAGCAGAGTAAATGAAATGTAAGTTATATAGTATCTGATTCAAAGAAACAGGAAAGA
chr01	4597642	chr01	8.76	GCAAATGGAAAAAATAACCAGGAGCAGAGTAAATGAAATGTAAGTTATATAGTATCTGATTCAAAGAAACAGGAAAGATGCTATGGTTCATCAGCATAGCA
chr01	4597643	chr01	8.76	CAAATGGAAAAAATAACCAGGAGCAGAGTAAATGAAATGTAAGTTATATAGTATCTGATTCAAAGAAACAGGAAAGATGCTATGGTTCATCAGCATAGCAT
chr01	4631643	chr01	10.55	TTCCTTTTAAGAGGCATCTGGAAAATTCCGCAAATTCACAAATAATTTATTGAGAGATCAAATCCAAATCATCCTAATTAGAGAAATACGTCACTAACGGC
chr01	4915401	chr01	10.55	ATAAAACATGTTAACTTCGTAGTACTTTTTTAAAAAATCCAATATAAATATACAATATTTTTAAGAATTTTAACGGCGTAACAAATAAAACAGATCAAAAT
chr01	5047607	chr01	10.55	AATAATATTTTATATCTAGAAGCAACAGTCTTATAATTCACACACTATTAATGTAATATGGTGGATACATGTTCCTTTCTTAATTAGAGATTTTGGGTTCG
chr01	3703284	chr01	13.74	ATATTAAAATCTAATTAATAGTTGTAAAGTATTTGATCTGAACTTTCCTGCTTTCCCACTGCCTTTACATATTTTATATTCCCTATGTTTAAATTTGTTTA
chr01	3703292	chr01	13.74	ATCTAATTAATAGTTGTAAAGTATTTGATCTGAACTTTCCTGCTTTCCCACTGCCTTTACATATTTTATATTCCCTATGTTTAAATTTGTTTATTCAACAA
chr01	3703294	chr01	13.74	CTAATTAATAGTTGTAAAGTATTTGATCTGAACTTTCCTGCTTTCCCACTGCCTTTACATATTTTATATTCCCTATGTTTAAATTTGTTTATTCAACAAAA
chr01	6808867	chr01	20.13	CATTGCTCACTCATTCAAGATAGGATATACAACTTCAGTAATACAGGTGTTCGTGATCCAACCATGAGCAATTGGCTATTTTCTGAGTTAATAAAGAAGTG
chr01	7130930	chr01	20.13	TCTTTTACTCCTTTGGATTCATTTGATATGGAAGATATTTTCCTATGAATGGACTTATCAGTGATGAACCAATAATTACTAGTCAAAGAAAGTGTATTTGA
chr01	7143527	chr01	20.13	TTAATACATACTACAAGGAATACTAACATACAACATCATGTATACTTTTGGTGTAAAAATTGATAATAACGAAGAGATTAATTAAATCTAATTATTTATGA
chr01	4631644	chr01	20.33	TCCTTTTAAGAGGCATCTGGAAAATTCCGCAAATTCACAAATAATTTATTGAGAGATCAAATCCAAATCATCCTAATTAGAGAAATACGTCACTAACGGCC
chr01	4919222	chr01	20.33	GATGATATTTTGCAAGAATATTTTCTTATTACGAAACTGAAAAATCTAACTAGATGGACTTAATGAAAAGGAAACCGGCAAAAAACTTGATATAATAAAGT
chr01	4919230	chr01	20.33	TTTGCAAGAATATTTTCTTATTACGAAACTGAAAAATCTAACTAGATGGACTTAATGAAAAGGAAACCGGCAAAAAACTTGATATAATAAAGTAAATCCAA
chr01	4923211	chr01	20.33	GATTAACCAAACCATGCAAACCCCAGGAGCATCACATGTGGTTACCCTTAACCATTGTTTTTCCACCTTTAGTGACTCAAACTACCAACCTAATGGTTAGA
chr01	4934804	chr01	20.33	AGTCAAACACCAAAAATCAATCCAAACAGAATTTAAATTTTAAAAAAGGACAAGTTTAAAAAATTCATTAAATTTGGTCAAAATCAAATCTACAGTAATTT
chr01	8648951	chr01	22.18	TGTCTATTTGTTCAATATTATACATGTTCAAATGTCTACTTGTGCACAACCAAAGTTAGAGGACATATGTCAATTGAGGCCAAGTTAAATGACATTTTTAT
chr01	8648955	chr01	22.18	TATTTGTTCAATATTATACATGTTCAAATGTCTACTTGTGCACAACCAAAGTTAGAGGACATATGTCAATTGAGGCCAAGTTAAATGACATTTTTATGTAT
chr01	8648966	chr01	22.18	TATTATACATGTTCAAATGTCTACTTGTGCACAACCAAAGTTAGAGGACATATGTCAATTGAGGCCAAGTTAAATGACATTTTTATGTATTATGTCATGCC
chr01	6190837	chr01	22.19	AGTGATTTTTTAACACAGTGGAAATTACAGTGTGGCAAAGTACGCGCCACGTGGCAAATGACTTGTCATAATCTGATCCATGAAATTATTTATATTTCCTG
chr01	6330121	chr01	22.19	CATGTAAGCAAAATCCTTCATCTATTTTATGTTTTTGTCTTAGATTGTCTCGGTCCAAAATTTGAGAAAATAAAGAAGATTTTTGAATTTTATGTTGTTAA
chr01	6449740	chr01	22.19	AAATTGTCTCATCTTTTATCAAGTCATTCGTAAAAGGGAATATTGCAATTAATGAGATTATTATTATTATAAACTTTGGAAAAATTTAAAAGAAAAGTCCA
chr01	6457671	chr01	22.19	GGCGAAGCTTTGGCACGATTTCTTCGTCCATCAAGTACAGCATGGACATTAATATAGCTTATCATCGGCGTCTAGAATCAAAAAATATAAATGACTTTAGT
chr01	6464149	chr01	22.19	AAAAAACACTTTTCAATCAAATTCTTTATTCTTGGCAAGAGGAAGAAGCAGATAGGGCTATTGCCTCTTTCCATCCGCCCTCGATATGCCTTGAGAGACAA
chr01	6541269	chr01	22.19	TATTTTCCGCTTTAATTTTTTATTGTTATAATCGTTTTATCTCAATTTACATGAAGGTGTTTGACTCATACAAATTTAAGAGGAGAAAAAAAGAAGAATAA
chr01	6542231	chr01	22.19	AATTAATATAATAAGACTAATGGTACACCACTAAACTAATAGTTAATTAGATACTTAAAATAAAGTAATCAAAAGTTGATTTTCCACTTTATTCGTTTCAA
chr01	6678773	chr01	22.19	GTCATTTTTGACTTATTTAAAGTTATTTTTTATATTTGTCAAAAACTTTCGGAAGTCAAAAATTGACTTAAAAGTATATTTGACCAACTTTTAAGCCCATT
chr01	6756418	chr01	22.19	AGAGTCAAGAACATTTTGAAGTGTATATTCATCCAAACAAATAAAAAATCGAATATTCTTTAGCATTTAGATTATAACACTTAGCAAAGTAATCAAATAAT
chr01	6760343	chr01	22.19	GTACTAGTAAATTTATTTAAATAAATTAGCTTACAAATTATTTAGAGAGATTTGTTTGTTACTAAATAAATCCAATACAAATTTAAAATGAGAGTTATTTA
chr01	6772909	chr01	22.19	CCAAGTCTTAATGTCATTGTTTTTAGAATAGAACAAGAACATAATAATGGTGTAAGAGGTGTTTGCCGAGATGACAAACAACTATCTCAGAACTCTTCACA
chr01	5376827	chr01	24.42	GGCTTTATTGGAGCTCTTCATATGTGTGTGTCTTTCTAGTTGGGTCTGTTCTAGATGTAAGGTTTGTTCTTGATGTTTTGCCTAAAAACCCTCTACTTATG
chr01	6342614	chr01	24.42	TTTCGAAGATTCCGACCAACATAGATTTTCAAACACCAAATAGACAAAAATTTCAAGAATGGCCAATTTATCAATCCTCTATCGACATTTTTTAAGAGTCC
chr01	6342656	chr01	24.42	GACAAAAATTTCAAGAATGGCCAATTTATCAATCCTCTATCGACATTTTTTAAGAGTCCGACCAACATAGATTTTCAAACATAAAAATAGACAAAAATTTC
chr01	5233477	chr01	24.44	GATAGCAAAAGAAGAGTAGAATTATTATTTTTTTAGTTATACAAAGGATCCTACTCTAAAGGCAATTATTTAACTAACAAAAAATCGAGTCTTTCATTTGA
chr01	5483483	chr01	24.44	TTGGTTGGTTTCTTAGGGGTAAAATAACATTCTTGTAAATTTCATTACAGGGAGTTTGGTTAATTATGAAGTCTCAGTCCATATCCCAATAAAATGACTTC
chr01	6457739	chr01	24.44	CGTCTAGAATCAAAAAATATAAATGACTTTAGTCATTCGGTTTAGTGTAGCTCAATTCAATCAAAGTTTACCATTTGATATAAAAAATGCAAAAACTTAAA
chr01	6463806	chr01	24.44	GTCTTTATTGGTTAGACTTTATAAAGTTGTATGTCAATGTAGGAACAAATGTGGTGGTTAATGTTTGATACTTCTTGGGGTTGTATTGGTGACAGTAAAGT
chr01	6592162	chr01	24.44	TGGTTCGACAATACTACTTACTCTTTTGATCATTCCTTTGATATTTTATTTGATCACCACTATAGATATGGAAAAATTAGAATACTACATTCAAATGTCAT
chr01	6613429	chr01	24.44	AATTGAAAAATATTTTTTGAAAAATGTTTTTCAATTTTCTCATATTTGATTGGTTAAATATTTTGGAAAATATTTATTCTAGGAAAACAAACTCCTTAAAT
chr01	7183749	chr01	24.44	TTTTCGCAAGCGAAATATACAACGGACAAAAATATACAAACCTCAACCTCTATATATAGCAAATGAAACTATAGTTATGGAACACAATTATCGAAACTATA
chr01	7246132	chr01	24.44	AAGCAGTTTCTATATCTCTACGAGATAGATATAAAATTTGTGTACGCTTTATTTGCTTCAAAACTTATCCACCTATTGAATTTTACTGAATATATTATTGC
chr01	7690346	chr01	24.44	TTTGTATGATTACTTTACCCAAAAAAATTCGAAAAACCCAAAAAATCCGAGGTTGAAAAACTCAAAATTTATTAGTTTGATTTGATTTATCAATTTTAAAA
chr01	7842327	chr01	24.44	AGTCAATGAATTGATTAAAATTGTGGGAAGAAAATTAATTTGTCTAACCTCAAAAGAGATGAGTTTAAGGCCAATGCGATTGTTAGTAATGATAGTAACCC
chr01	7843171	chr01	24.44	TATTTTTATGATTATCCTTTAATAACTTATTGATGTTAATTAATTTTCTGATTCTTGTATCCTCTATTCAATTAGAAAAGACTTGTTTAATCATGGAGAAA
chr01	7845587	chr01	24.44	CAACATATAAAACAAACTTTTGATAAAGTATATAGAAGCATTTATAACTAACTAATTAAGTACCATGTGTAGTACTAGTAGGAGTCTGTTGTGATGGTGGT
chr01	7875893	chr01	24.44	TAGCCCCTTTCTTTATCTAAATTAGTCATACTGAACGAGAGAACATATTTGCTGAACGCGTATAAGATGCATGTAATGATAGCAACATAGACTCATGTTTA
chr01	7882144	chr01	24.44	AATTAATAATATTATTATATTTTAAAAATGTGTCAATAGTTTTTGCAAAACATATTCAAACTATAACCCATATCTTTCTATTTTTCTCTTTCTTGTTATGT
chr01	7972148	chr01	24.44	TAGGAACTTGAAATCAAATCCAGCCTCTATCTGCTATTCAGTTATGAGCTTGTCATATGGGGTTTGCCTAGTGCGATTTACATCTTTAGTGTGATTTGCGA
chr01	8106548	chr01	24.44	GGTGACTCAAATCCACAATCTCAAAGTTCTAAAAACTTCCACTCTTCCTTTGGTGATTCAAATCCATAACTTCAAACTTTGAAATTAAAGGTGACTCAAAT
chr01	8189181	chr01	24.44	TGATTGAAAAAACGTATTTTTATTAATTGTTCATCATTATTTAATTTATTTTCTTCTCTTATATACTTATCCATTTCAGGATTACCCATGAATTGTGAATT
chr01	8504845	chr01	24.44	CAAAATGTAATTCATCGGCATAGTTCATTTGAGTAGTCTCATTATTTCTAAGTGATCTTCAATTTTAAAAGAATGTGTACATTTTAAACAATTAAATTGAT
chr01	8505736	chr01	24.44	ATATATGTATTAAAAAAAATTCCCTATACTAAAAATGTATCATTTTTCAACGAATAAGTGTTGATTGATACTTTCTAATACATATAGTTCTAAAACTGTTT
chr01	8505888	chr01	24.44	ATTCTACGACTATCTACATTACAAAAAGAGAATGTACTAAGTGAGTTGAACATGCAATATAAAATAATATTTTCATTCAAATATAAAGTAACATGATCGAA
chr01	8658706	chr01	24.44	CAATTACAAAACATGGAGTTAGTTACGAAATTTATCTGTAATTCCTAGTTAATCCATCACTTATAAACTCCTAGATGATTGAATTTTCTTACAATCTATCG
chr01	6081683	chr01	24.62	AATTGTTGCACTTGAGCTGAGGGTCATAAGTAACAACCTCTCTACCTCCACGAGGTAGCTAGTGGTAAGGTGTGTGTACCCACTCGTGAAAATTACTCAGT
chr01	6090302	chr01	24.62	TGAAATTTGAATGTTTTCTCTCGATGTTCATATTCAATGTAACGAGATACATCGTTATTATAGTTGTTTAAGATTATAATATCCTAGTATAGATTTACGCG
chr01	6161372	chr01	24.62	ATTCAAAAGCTATTTTGTTAGTTGGAGGGCATTTTTGAGTGAAAAACATAACAAAGGGTAAAACTGACCCTTATTGAATAGTTTAGGAGAATAATCGATAC
chr01	7432324	chr01	24.94	TTATTATTATAGCGGTTTTCATGTTTTGGACCAATTTATGAATATCTCAATTATTTCACTAGGTGTCTAAAAAAATTTATTGGCAAAACTATCAATCAACT
chr01	7432348	chr01	24.94	TTTGGACCAATTTATGAATATCTCAATTATTTCACTAGGTGTCTAAAAAAATTTATTGGCAAAACTATCAATCAACTTTATTTACTATTACTTGATAAGTA
chr01	7432355	chr01	24.94	CAATTTATGAATATCTCAATTATTTCACTAGGTGTCTAAAAAAATTTATTGGCAAAACTATCAATCAACTTTATTTACTATTACTTGATAAGTAAAAAGAA
chr01	40832391	chr01	25.4	TCTTCCATTACATACCATATTTTACTACTCCAAATGTTGTAATTGTCACCATTCAATTTTTCACCTTTGTTTAAGTTATAACTTTTAAGCCATGACTGTAT
chr01	52440269	chr01	25.4	GTTACTTAGACAAATTGAACCAAAAAACAAGAATGAGCTTGCATTTTGGTCAGCAACTAACCTATTTAATTGGACTTACGAGCCAAAGTTGTTGAGTGAAC
chr01	52440291	chr01	25.4	AAAAACAAGAATGAGCTTGCATTTTGGTCAGCAACTAACCTATTTAATTGGACTTACGAGCCAAAGTTGTTGAGTGAACCGCAAAGATTGTCGAGCAAGAT
chr01	23151772	chr01	25.52	TAGTGGTATGCAAGAAAAGATCATCCACCTTGTATTCCATGTTCTATCCATCTATTAATCTCACGAGTTCAAGATAAGACAATAAATTTATTTTAATTGTG
chr01	28377001	chr01	25.52	TCACATCATATCATATTCATACACAAGTGTGCACATGAGGATAATCCTCCAACAACACAACAGATAGATCATAATCATATTCACTTTACTCTCAAAGTGTT
chr01	46512726	chr01	25.52	TTTTTAAATATTATCTTATTTAAAATACGAAACACCTATAAGATAGATCAGCTTTGTGGATTGGCCAATAACGTAATTTTACATCATTATAATTCATCAAG
chr01	50798425	chr01	25.52	CAATACAAAGAGGAATTTCATTAAGTTATAATACCTCAATTTGCTACTTTGATTTATAGGAAAGTTAAATTTTCTACATAAAAAACAAAAATAACTAAGCG
chr01	51168205	chr01	25.52	AAATAGTTCAATCTCGTGCGGAACACATTTAATTTACCTAGTTATATAATTAATTTAAACATATCTTGAAACATTAATATTTTCAATGTAATAACTTACTC
chr01	51227146	chr01	25.52	AGAAATAGGAATTAAATTTCAATTATATTATTCCTTTCTATTTCACCCTACGTAATTTTAATTCTTCACTTTATGTTTTCACTAGTTTCTGCAATGCGGCC
chr01	51227148	chr01	25.52	AAATAGGAATTAAATTTCAATTATATTATTCCTTTCTATTTCACCCTACGTAATTTTAATTCTTCACTTTATGTTTTCACTAGTTTCTGCAATGCGGCCTG
chr01	13591773	chr01	26.21	AAAAAAAGTTGTGCTTGTTCTGAAGCGTATGTAACTCTAGAGATATAGTAATATGGAGAAGACGATTGTTTCAAGCATCGATAGAAGATAGGTTTAAGTTA
chr01	13591787	chr01	26.21	TTGTTCTGAAGCGTATGTAACTCTAGAGATATAGTAATATGGAGAAGACGATTGTTTCAAGCATCGATAGAAGATAGGTTTAAGTTAGCCACATAAAATAT
chr01	27423462	chr01	26.21	TCGCATGTAAAGAATGAAGAGTCTTCTAACTATTATGGTAAGAAACCTCTCAGATGATATCGATATGGCAATATTGGACACATAAAAATATATAGCCAGGT
chr01	8834347	chr01	26.88	AGTTTAATTTTTTTCATTAGTAGATAAATACTCAATAAACTTTTTTCAATAACATACACATAAAGGACATTTGGAATTATTTTTTATATCTAAACTTATTT
chr01	8846992	chr01	26.88	TTGATAAATCTGCCCTTTTCTAATATTAAATTCTTTCAAGCAATTATTTCAATAAGAAATATCATGCCTAATAAATTCTTTTAAAATAAAATAAAATATAA
chr01	8896112	chr01	26.88	GTTTGGTAAAAAATCACATGTCTACATAATTGTTAGCCAATTTTATCCAAATCAAGTCAATTTGGCTACATCTTTAATCCATATAGCCATAAGCCATGTCC
chr01	9006682	chr01	26.88	TTAGGGGTCGTTTGGTTGTTTGTTAGAGTTATGCAAGTATTAGTAATGTAGAGTTTAGTTATGCAGGTTTATTTATGCAAGGTTTGATTATGCAGGGCTTA
chr01	15909573	chr01	27.05	ACAATTCAACCCATTTTGTTTACTATTATTAGTTTAAGTCTCTTCAATTTAAAACATTTTTCTAAATTCTTTTTACATTTTTTGTACAATTTGAAAAACTC
chr01	15909578	chr01	27.05	TCAACCCATTTTGTTTACTATTATTAGTTTAAGTCTCTTCAATTTAAAACATTTTTCTAAATTCTTTTTACATTTTTTGTACAATTTGAAAAACTCATTAG
chr01	48595600	chr01	27.05	CTTTTCCTAATTACTTTGAGTGTAGTTTCGTTTTCCCAAGTTCTAAAATATTTTTACTCTATGCTTGCCCTATATTCAGATATTGTGTTGCTATTCTCTAC
chr01	7493289	chr01	27.34	TGAGAAGTTTTAGGGATTAGGATTTTTTTTTAATGTTTTTATGAAATTCACTATTTTGACATACACGTTATACTCTTATACTTTTTTGTTTCAACTTAAGT
chr01	7500465	chr01	27.34	ATTCAGTAGTAGCTCATAAGTAAAAATATTTATTTCAATTGTAATATTTTTTTCGTTTAAAAAAGAATGACTTAGTTCGGCTTGATAGTAGTTTAAGAAAA
chr01	7522076	chr01	27.34	AGAATTTTAAAGATATTTATTTGTGAAAAATCAAGTTAAAATGTTATTAACTATAAAAAGTAGGTTTTATATATAGAGTTTAACAAGTAGATATATATGTC
chr01	7602622	chr01	27.34	CATGTCAACAATGACAACTACGAAAGAGCAGTAATGGAAGTCGGATAATCTTAGTTAGTAATTTCACAATTTTTCCAGCAAAAGATTATGGCAACCACAGA
chr01	7602628	chr01	27.34	AACAATGACAACTACGAAAGAGCAGTAATGGAAGTCGGATAATCTTAGTTAGTAATTTCACAATTTTTCCAGCAAAAGATTATGGCAACCACAGAACGGAA
chr01	7645476	chr01	27.34	GAAAATTATCTAATTCTTGTTGAGCGGCCTCTAAATGCTTACAAAGTGTCATGAATCATGGTTAGACTATAAATAGTATTCTCCCAAGTTATTATAGAGGG
chr01	7665755	chr01	27.34	TTTTCACTCTTGTATTTCTCAAACCTGTTTTGAAAATGCTTTTCTCGAGCTGAGGGTATTATAAAAACAACCCCTCTACCTTACCGAAGGTAGGAGTAAGG
chr01	12538726	chr01	27.82	AAAAGTGTGTTCTTTTAGTAGTGCACTATCTTCAATGCGAAGTTACCACTAGTTAATAAATCTACATATAACTAAATTAGTATTATTTTTGTTGATATTAC
chr01	19643347	chr01	27.82	AAACATGTGATGGTCATTAGTAAAATCATTGTCATTTATTGTTTTCATCTCTGGTAAGTTTTTACTTTCCTTGAATGAATGCAATTATGGTTGTTGTTTCA
chr01	29477765	chr01	27.82	TTAATCTTATATTTTATTTCTTATGTTTATGAGAGCTAAGTGTCTTGTATGGAGTCCTTCTGGGTTCTATACGCCATGTTACATCTAGAGGTACCCCTGGT
chr01	30575246	chr01	27.82	GTTGGTGCTTCTTGGTCTTAAATTCATACATCAACATTATTATATTAGTCGGATTATAATATTTTATATTAATAATAAATAAATTAAACATTGTACATTTC
chr01	49518019	chr01	27.82	TCCAAAACTATGGTATTATCAATTACAAAGAGTTTACATCTTTCTATGAATAGAATTCTAAATTTATATTTGAAATGTATATATCCCATTTAATATATATT
chr01	55151550	chr01	27.82	GTTTTTTGATAACCTTATCATGAAATTCATAGTCCCTACTCAATTCAAGATCAATAATCAAGAAAAATTAGATCTTCAATTTTTTGAATAAACCTCAGTAA
chr01	31085905	chr01	27.84	ATAATCAAGAAAAGTCTAGGTGCATGATTCGAAATTCAGTGAATAATGGACTTGACCCTCTACCTTTTTCCACTTTATCTTTTTGTCTGCGGTAGAGTTCG
chr01	35481263	chr01	27.84	CCTTATGAAAATAAAAACAAAATAAGGGAAACCCATCCCTGCAGATAAACTTGAAGCCTAATGAGAGGTGAGTTAAGCCTAGGCTTTTGTCACAAGCCACA
chr01	49054907	chr01	27.84	TAAAGTAGGACTTTAAGGACTAACTATAAGGCTTATGCTTGCTTATTAGTGTAGATTTTCGAACAATTATTGGGTCATGTCCTTGAATATGTTATAAAGCC
chr01	51413591	chr01	27.84	TATATAACTCATTGCCTTAGTATAGTTATAACTTCTGTTTGAGTATTGGTGTATTGTAAATTACTCATTCTTTTGCCTTATTAGAAAATAAATTGCCATTC
chr01	12297642	chr01	27.86	CAATTAATCGTCTTTCCTTTGAACTCGAATCTATCTATTCCAATTCAACCGATTTCCTAGACATGCATTGTACTGTCGAATGGCTATTAGTAACATTGTCA
chr01	12454321	chr01	27.86	TGAAAGAATTTGGTGTGTGGATCGTCATTATCAAATTGAATGACTTATTACTAAGTAATTATCTCAAAAAAAAATTTAGTTTTTTACTACTCATGATTTTC
chr01	12538750	chr01	27.86	ACTATCTTCAATGCGAAGTTACCACTAGTTAATAAATCTACATATAACTAAATTAGTATTATTTTTGTTGATATTACTATTTTAAATAATTTTGAAAATTA
chr01	12576058	chr01	27.86	CTTGTCATAACATTACTACCTGAATGAACTTGCGTGAATAAAATCTTATCGTAAAATAAAACAGTTCTTAAAAGGTTATTGTTTGAATGTAAGCGTCCACC
chr01	12682658	chr01	27.86	GGTAAGCTTGTTGATGTTCGAAAGAAATCACTTGAATTGTGATAGTTGTTTGAGAGAAAACTATCTCACTTATAGGGTGCGTTTGGTATGAAGGAAAATAT
chr01	12697058	chr01	27.86	AAGAAAGCTATGAACTTATGAATGGTAATCTATTCATGATTTATGATAAATACCTTTTGGAAACTAAGGTTGCTTTTAAGATAGATATCAAAATAATTGTG
chr01	12697734	chr01	27.86	GTATTATGTTTTCCTTTATGTGCGGTTATGATTATATTTCATGTTTTCATAAATTTCCCCATACTTTGTATATTCCATGTACTTATGCATACTTGTGCCTA
chr01	12726356	chr01	27.86	AGAATCAATTTGGATTCATATTGGGGATATTGACTATTAAAGTCATTCATATTGTGCAGAGACTAGTGGAGAAATATAGGGAAAGGAAAAAGTAGCTACAT
chr01	12758970	chr01	27.86	AAAGTTTTCTCGCCCAATTTCTTTTATGAATAGCCCACCCATAATGACAGAAAGGGTTGTAATAGTAATGAATATGATTTAATTTATAAATTATTAAAAAT
chr01	12759518	chr01	27.86	GAGTCGTAGATGGAATTTGTAGGAAGGATTAAGAAGAATTATTTAAGACCTCGAGTCTACAAAAGAGAACAACGGGTCGTAATTGGTTCTATGGGTTGTAG
chr01	12871862	chr01	27.86	TTTAGATAAAGAATTAAATGCACTTATATGTCATTATACAAGAAAATTAATAATTTTTTATTTTAAAAAGATTTGAAAATTGTATTTAATGTATTCATATT
chr01	12882356	chr01	27.86	TTCACCTATTATATATAAATAGATGTAATTAATTTTAATTATTCAAAAATCTGTGTTTTGTGGTAATGACATGTGCCACTTTTCACTTCTCCTATTATATA
chr01	12882368	chr01	27.86	ATATAAATAGATGTAATTAATTTTAATTATTCAAAAATCTGTGTTTTGTGGTAATGACATGTGCCACTTTTCACTTCTCCTATTATATATATAGATATATT
chr01	12907358	chr01	27.86	ACATAAAAAATTGATGGACTTTGATCTGATGAACACAAATACATTCAGACGTATCATGAACACATATAAACCACTTATTCCATGAATAAGTAGAATACGAT
chr01	12914155	chr01	27.86	AACACTTCAATCTTTGCAAATTAAAGATTTCTACAACACGATTACTTTACTACGCTAGGCCTATACATATGAAAGAAAAGTAACAAAGAGCTCTAACAACA
chr01	12920087	chr01	27.86	TTCAAAAAGGGAGAAGTTGATATTTTGAGAACTCAAAGTATTCCAATTAGAAGGGTGTTTGATTAAAAAGAATTGAAAAAAAAATGAAATGAAATTTTCTT
chr01	12920355	chr01	27.86	ACTATCAGAGGGACCAGGTAAAAAAAATGGCAGCCCTGAAGGTTCAACATAAAGCCTGGGCAGCAAAGCATGCTGAACTTAAAAGAAGATTCTAAAAAATC
chr01	12921924	chr01	27.86	AAAGGACCTAATCAACTGAAGGAGAGCTTTCCGTATCTGCTGTTATTCTTAATTGTTTGTATTTGAGCTTAACTTGTAGGATTCGTTTCCCTTGTGTTAGA
chr01	12929021	chr01	27.86	AAAGTGAAATCATTGATGAAATATAATTACATCATAAATATTGTATCTGATGACAGATGAGGCAGCGTTTGTAGTCCAACTAGGATTAGTCTCTTATCTCC
chr01	13091821	chr01	27.86	GAATCATTCGCTATCTAATTAGCACCACTGAAATGGGTCTATGGTATCCTTATTCATCTCACTTTGATTTAATTGGCTATTCAGATGCTGATTTTGCAAGT
chr01	13095128	chr01	27.86	TGTTCCGAACCAGTATAAAAACATCCCGTGTCAATTTACTTTCAACACCTCATCTTGTTTTATATTGTGAAACTAACTTGCATGTGAGTCGACTACTCCTC
chr01	13109702	chr01	27.86	TTAGTGTTGATACATGATATTATGATGAATTTATGTGAATTCCATGGTTAACCTAGTCTACTTGATGAAGTTGAATTATGTGGGTTATTGTCATGGAAAGT
chr01	13109724	chr01	27.86	TGATGAATTTATGTGAATTCCATGGTTAACCTAGTCTACTTGATGAAGTTGAATTATGTGGGTTATTGTCATGGAAAGTGAAACTGAAGGTCAAGGTGATC
chr01	13113280	chr01	27.86	AGGTAGATGTCACATGCTTATGAAAAATAAAATTAATTAATTTTTTATTGATATTTCATGATAGCGATAAAGATGAGGAAGATAAAGAATGATTACTTATT
chr01	13113978	chr01	27.86	CAAAAAGTCTCTCAAGACCAACGAAATATCATAATAAAGAATAACTCTATCATAAAGATATTTTTAGTGATTGTGAGTGTTGATTTCTGTTATTTATAACA
chr01	13115434	chr01	27.86	TTGTGTGCATCACCACTCTTTGATAATCTAGTAGTCTTTGGAGATGAGTTCATTACAAGCAAAAGACTCATATTCCTATGGGTAATACTAAGTAGTTGGGA
chr01	13251001	chr01	27.86	ATATTTGCCTTGACAGGACCCATGGTCCAAACTATTTACCCAACTGCCCCTTTGTACTGTTCACTGAACCACTGATTTGTCATCCTTGATACCATCAGAGT
chr01	13592192	chr01	27.86	TGGCCCATGTATTAAAGCCTAAAATATACTTATATGGCATAAAGCTCATCAATCAAAATTGGATCGGCACTGAATCTCTAGGTAACTGAGTAACAAATTTT
chr01	13738735	chr01	27.86	GGTTTAATTTCTTGATGCCCACGTCTCTTGCCCTTTTGACAACTCTTTAGTGTCAACTTTCTATATGACAGATTTAATACCATGAGATTAAGGGCATTTTG
chr01	20726624	chr01	27.86	ACCAAAGAAATGACCTTTATACATTTGAGCAATGAAAGAATCACCTGATATGATTTTACATTTAAATAAAGAATGGTTTGGACCTTAGCTTAGAAATTTTT
chr01	21038911	chr01	27.86	ATTAAACACACAGAACAACCATTCATGAAACACAAGAAATTGTATGCATACTGATAAAAATTTGAAGGCAAAAGTTTTTTTTTATAAAAGCTGAAACAGAG
chr01	23200568	chr01	27.86	TCCTAGTGGTATAAGGACAAGATAAAATTGCAGTACATCATTAGTAAAATGATCATTAGTCACACTCCGAAATCGAAATGATGCAAACTTGGTGGCAATGG
chr01	28111183	chr01	27.86	TGCAAATCAACTACAAATCTGTGGAACATGTTCCTTTGTATCCTAGGAAACAGTTGGGTAATGCCTAAGTCTACTATGGAATTACTCAACAGGTGGAAAGG
chr01	28111184	chr01	27.86	GCAAATCAACTACAAATCTGTGGAACATGTTCCTTTGTATCCTAGGAAACAGTTGGGTAATGCCTAAGTCTACTATGGAATTACTCAACAGGTGGAAAGGT
chr01	28308843	chr01	27.86	AGAAATATTCACAGATGATTCTGCATCTGGATAGAAGTTTTAGAATCTTTGTAGAAATCCTTTTAAGTAGTATCAAGGATACACTGATTTTGCTGTCACTT
chr01	29356325	chr01	27.86	GTTGATACTTCCAGAAACAAAAATGCGTTAAATAAATTATCTTTGATTTAGTGTTGAAGTAACAAATTTTTGGTAGACTCTAGTAGTAACAGAAACATGCG
chr01	29992317	chr01	27.86	TATCCCACTAGGTTTTCATTGTACGGTTTTTAATAAGGAAACTTAGATGCGTATTATTAAACTAGTTTTGACGCACGTGCGTTACACATGAATATCAAATC
chr01	30575325	chr01	27.86	TAAATTAAACATTGTACATTTCATTTGTATTGAATTTATTTAGCAATAAACAACTCTCTCTAAATAATAAAATTTGTACCCTAATTTATTGAAATAAATTT
chr01	30683320	chr01	27.86	GCCTAAGATTCATGCAAAATTTCAAGTTAAAACCATCAAAAATACCGTAAACTCACTATACATCAACACCCTCAACTTAAAATTATTGCGTGTCCTCAAGC
chr01	30838590	chr01	27.86	TTTCAGTGATGTGACTTCAAGAGACCGCATGACAATCATCATCTCTGTCAATTTTGATTAGAACACTCTTTTCCTTCTTTTCCTCGTAACTTTTTCAATAA
chr01	31036403	chr01	27.86	TGAGAGGTTGTAAATACCTGGTGGAATAGTAAAGACGCGTGCAACTTGGCCCAAACACCATGTTATGCAAAAAATAATAATAATAATAATAATAACAACTG
chr01	32047592	chr01	27.86	TGGAAAGATAGCCAGTTTTAGGGAAAACTTGAGGAAGTAGAAAAAGTGTGGGATATACTTAACTTTAGTAGGAAAAAACATCTTAGCTAGAAGATTACTCT
chr01	32463690	chr01	27.86	TCAAAGTTTGTTATGGACCACAACTACATTTCTGAAATTAGTAGAAATTTGAACCTATCTAGAGTCATATGTACTCCTTGAAATCAGTCTCTATCCAAGTA
chr01	33361494	chr01	27.86	TATCTTATGGCTGAAAACTTTAAAGCAATAATCATAAGCAGGATGATACACTGGAACAAACCTAATGGCAATAATTGGAAGCTCAATACCGATGGGAGTTA
chr01	35490290	chr01	27.86	GACGCATTATCGACTATTTCTCCAAAATTTTGATAATTCTGAAGTCCATCCTATAAAATAATTTCTGTGAACAACATGTTCAAATATTGATACATAAAAGT
chr01	35490472	chr01	27.86	CATCCCTTCTAGAAGAAGATGAAGACTAGTGGACTCTAAAACATCTACCTATATGAAGTCTCATACATGGAAATAATTGATTCATGTATCATACCTTGAGT
chr01	35870180	chr01	27.86	ATAATCAACACCCTGTGAAGGTCCAATGGACAAGAGGAACCTCTCAATACTGGAAATCTCTCTGTGGGGTTAAATTTAACACCGAAAAAAATATCTATTGG
chr01	35872988	chr01	27.86	TTGTGTGGTAAGTGATTTGGATATGAATTATTGCCACAAGAAACCTAAACTGTAAAGTTGAGTTGGAAACTTCTTTACCGGTTGAGTTTTCGTATAAGTTC
chr01	36113614	chr01	27.86	GTCTTTTAATTTCTGTTTTGAGTTTTCCTTTATGTCTTTGGCAATGCTGTGGCAAATTGGAAGAAGATATGATAGTCGTAGTTTGAATAACTTGCTCGAAA
chr01	37460175	chr01	27.86	AAGACGTTGTATCATCATTAACTCATAGTGATGATTGTCTATTAGAGAATCTCCCAATAGAGCTAAAGTGCATGTAATATATAAAAAGCAAAGCAACAACA
chr01	37489369	chr01	27.86	GAGAGTGATGTTTCATGTAACCTGAACAATGTTGCATTTGATCTAGATGCGAGGAATATTCAGAGGTCTTTCTCAAAAAGATCTCATAACTATCTTTGGAA
chr01	37670242	chr01	27.86	GTCAATTGTTCATATGCTGCACAGTTAAACTTATCCTCATGCTTTTACCCCAAAAGGAATGTTCCAATATTTCTTTGGTTAATAATTATAAACAATGTCAA
chr01	38469511	chr01	27.86	CTAGGGCATGTTCCTATGAAAAGAAATCAAAAATGGATTTTTACATATGCCTAGATCAAGGATAAATGGAAATTATATTGATACGACTTTTTCAATTGTAG
chr01	38492016	chr01	27.86	TCCAAATGTTCAAATGTTGGTCATGCAACACATGTGTAAGCTACCTATGTCATCATGTTTATTTATTTGTATTGCCCCATACTTAGTACATTTCATGTACT
chr01	38492076	chr01	27.86	ATTTATTTGTATTGCCCCATACTTAGTACATTTCATGTACTAATGCATACGTTTGCCTATAATATTTTACTAATGTATGGTCCGACACTCCTACTTCTCAC
chr01	41067419	chr01	27.86	ATGTTAGCAAACCCCAAAACTCACTACGTAGCCTAAAACATGATTTCTAGCAAACTAAGCATGGTTAACTAGATACTCATCCCAAATTCATACAAATCAAT
chr01	41863368	chr01	27.86	GAAGGAGGGGTAAGACCAAGAAGAGGAAACATATAACACGAGAATATAAGAAAAAGTTCCAGTTTTCAAATAAACAAATACTTAATGGCATCAGGCATGTT
chr01	41878864	chr01	27.86	TTGAACTCCTATCTTTCATGTTGGACGAGCTTTTCTTTGTGGAACATGATCTGCTCAAGTTTCCATCAGCCTTCATAGTTGCTACAGAAATCCATATATGG
chr01	41878883	chr01	27.86	GTTGGACGAGCTTTTCTTTGTGGAACATGATCTGCTCAAGTTTCCATCAGCCTTCATAGTTGCTACAGAAATCCATATATGGAATATGAAATGCTCAAGTT
chr01	41883505	chr01	27.86	ACCAATTGTTAACGAAAATGTGAAAATCAAGAATAAGGAGGAACAATAATTTTTAACGTGGTTCGAATTAGAATGATCATACGTCCACTAGAGAACAGTTG
chr01	42557042	chr01	27.86	CCACAACTCTCTTAGACCAATTTCCGTATTTCGAGACTAATGGAATTGTCAAAATTTCATTTTGACACTCAAAACTACAAAATATACTAAAAATCACTTTT
chr01	42683386	chr01	27.86	TAGGGATCATCTTAATGGCCTTAAGGTTAGAGATAACACTGAGCTACTACCCTTCCACTCTAAGACTGACTCGCTTGGAAACTGAAATCGAATGATCCTAG
chr01	43121124	chr01	27.86	CAAGATAAAAAGTATCCTTAAAAATATGTTCCTCTTTAATTTTAAGTATACTCTTCTTTTAAGATTAAAAAAAATGCGTCTTATGCTAAGAGGAAGGTAAA
chr01	43154741	chr01	27.86	TGTCGGCGTTGTTAATCAAGGTATTGATAAGTCCAAAGGCATTCCAAGCTTTTTGTACAGCGACCTCAATAGTAGCACCATTGGATGTGACATCAAGCTCG
chr01	43193958	chr01	27.86	AGAAAGATAACATAATATATGCATGGAAAATTCATCCCTCATAAGAAGAATGAATTTAAATGAGATTAAACGAGGTTATGGTGCCCAAATGAAAGGAATTT
chr01	43199801	chr01	27.86	TTAAGAACAAAAGTTTAAAAAAACGTTCTTTCTTTCTTAAACTATGTGCTAAGTCGAACACCCTAACATGAATTGGGACGATGGGAGTAAATAGTTAGCAG
chr01	43324014	chr01	27.86	GGCACAAGAACTGCTACAAACACATAGATAATATATCTAATTATTCTATCGTTTATAGACAATATAAATATGATTTAATATTTTGGTTTCAAAGTACAGAC
chr01	44159547	chr01	27.86	TCAAAACTATAGAGTTCTCAAATTTGACTCAAAAAGACCTCTTGAACTTTCCTCTTAACTTTACTTTAATTTGAAATGTAAATTAAGAGATTTTATTAGGC
chr01	44249310	chr01	27.86	AAGCCAAATGAAAGCTTACAAACAGTATGCAATTTATTCCAATTAGTAACATTAATGCTACTATTATTACTTCAAACTTTTAAAAACTTCAAACTAGGATG
chr01	44252013	chr01	27.86	TAAAGCCCTCAGAATAGGGAAAATTTATGTCTTTGAAACTGTGTTGCTTAATTAAATTATTTGTTCAGGATGATAGAATTTGTTATGACCAGTCATACCTT
chr01	44785596	chr01	27.86	CTTCCGATTGAAGTATTCTCAATACGAAAGATTTTCATGACTTAGTCACTTTTGCTTAAAGTGTGTTTTTACTATGAAAAAATTATCATGATTTAGATGCT
chr01	44835315	chr01	27.86	GTGTTAATTGATTAAAAGATACTTAAATAAGGTGAATTGGAAATTCTGTGAAATGAGTGAGTGACTAGCAACTTTATATAGAAGAGAAGAGGCTCAACATG
chr01	44847546	chr01	27.86	GCTAGAGAATTTTCTTCTATTCTTTACTTCTTCTTTTTCCCATTTTCCTTAGTTATGTGAACCATATGTAGTAGGGCATCAATTTTTGACCTCGCAAGGTG
chr01	44856762	chr01	27.86	TGATTATGTTTTTTTTGTGATTCTGACACATGACAATTTTTGCCTCTCCTATTACGTATAGATAGATTTAAAGAGATTTAATTATAATGTCATTTCGGCAA
chr01	45222189	chr01	27.86	TTCTTCCATACAATTACAGTATTAAAGTTCCAAATCGATTTTTTTTAGCATGAGTAATTAATCTGATTCATATTTTCTAGTTGACATATTTTAATTCTAAT
chr01	45769189	chr01	27.86	TTATATTTTATATGGGTGGACTGTAATTAATTCAATTCATCTAAATCTGATCTAATCAATTCATTTACAATCCCTAATAATCGCTAAAATTATCAAGAATC
chr01	45785542	chr01	27.86	ATGTCTTATAGATATTATATCGTGATATAACACATTAAACTTTTTCGATACAAACTTATTCACTTATTAGTTAATATAACAAAATTTATAGATGAATAAAA
chr01	45785568	chr01	27.86	ATAACACATTAAACTTTTTCGATACAAACTTATTCACTTATTAGTTAATATAACAAAATTTATAGATGAATAAAATTGAATATAAGCCTCATTTGTTTGCC
chr01	46088016	chr01	27.86	AGAAAATGAGTTTGTTAGAATATGTACATCAAGATAATAAATATATCATATTCTATCCTTTTCCTTTTTTAATAATGGAAAAAACATTTAATTTTATTAAC
chr01	47270501	chr01	27.86	ACAATCAGAACAAACACAATAGTAGGGTTTCAGAATATGTATTCCTTACCCGAATTAGATGATAAATGCAACCCTTAGAAATCACATTTCTAGTCTATAGG
chr01	47714965	chr01	27.86	ATTAATATATATGTACGGATGCTACCTTGGTAAGTAGAATCTCCTTCTTTCGGTACGAGAAATATATCAGATTCCACCTCTAGATTTGAGGCAATAAGGAG
chr01	47818158	chr01	27.86	GATAAGACAAATAATAGTAAAATCATTGATGAAATATAATTAAATAAACATCAATTGTAAAGTTTATTTTAATTTTTACATAAATATTCAAATTTCAAGAT
chr01	47824342	chr01	27.86	CTCACGAGGTCTCTTTTTGTAAATATAAAATAAAAATAAATAATATAGTAGTGACTCATGAGGTCTCCTTTATTGAAAATAAAAATAAATTACAAAATAGT
chr01	48813227	chr01	27.86	ATCTTCTGCTATTTTTATCCTTTTACCCTTCTCTTTGATATGTCAAAAGCGGGAAGCATATTTGTTGAAATAGGAGCAAGAAAATGAGTAAATTTGTCATC
chr01	48815796	chr01	27.86	GGAGTCGATTTCAAGAGATGACAGTAAAATATGTCATTTTATCTGACTACGTTGAGTTTGCAGAGGTTCATTAATGAGAATATTCCTATTATGTCGAATGA
chr01	48903222	chr01	27.86	AAATCCATATGCTTGAACAACAATCATTGTGCAAATTATTGAGTGCTTAACTTCGTATAAGGGATGAGAAAAGTTGTGGAAGATGACTATAGAAAATTAAA
chr01	49055232	chr01	27.86	GATCTGCTTCTTCAAAAAAGAATCTCGTAAGACTCTGATACTAGTATTTACAGATTGAAATACTAAAGAAAGGTTGGTTTACTAAGTTATTTTATAACTTA
chr01	49118925	chr01	27.86	TAGTGAATATGAAAGTGATGATATGGTTGTTCATGAAAATAATGAACAATCAGCTCAGTGTAACAAAGTCATGTGTTTTTTTTACTTCACATTGTCTGGAA
chr01	49223758	chr01	27.86	TTGATAATATCAATAATAAATCAGTTTCTTCATACTTACTGAAGTCAAATAATTTGTGACATGATTGTTAGGACATGTCAATTATAAGATCAAGCAAAAAC
chr01	49345915	chr01	27.86	GCTTAATACTGTCTGAACACAACTCTATCTTCAAAAAGAAGTAAGACAAAGATGGACATTTGAGACTTGAAACATGGAAAGCCAGAAAGGCAAGTGGAAAT
chr01	49345926	chr01	27.86	TCTGAACACAACTCTATCTTCAAAAAGAAGTAAGACAAAGATGGACATTTGAGACTTGAAACATGGAAAGCCAGAAAGGCAAGTGGAAATCTAAGAACAGA
chr01	49515945	chr01	27.86	TCAGAAATAATTAGGTAAAAACACAAAATAAAAATAAAAATAAGTTTAAACCAATGTTGTAATTAGGTGGGGCGTTTTACTTAGCATAGGGCGAGACGTAA
chr01	49515958	chr01	27.86	GGTAAAAACACAAAATAAAAATAAAAATAAGTTTAAACCAATGTTGTAATTAGGTGGGGCGTTTTACTTAGCATAGGGCGAGACGTAAGCCTCGAGGCGTA
chr01	49783621	chr01	27.86	TATTCATAGACCATAGTACAATAGCAAAATTTCTAGTTTCATAACTTATATTTTTATTTTTTTGAAGAATAATATATTATTATCATATTATATTAATTAAT
chr01	49804829	chr01	27.86	TTGACAACCGTTACAACTGTTCATCCTCCATTGCAACAATAAAAATATCATTCAAGTTAAAAAAATTGATTATCCTCTTTAATTGTAGGTTAAAAGATGCA
chr01	49804846	chr01	27.86	TGTTCATCCTCCATTGCAACAATAAAAATATCATTCAAGTTAAAAAAATTGATTATCCTCTTTAATTGTAGGTTAAAAGATGCATTAGATTTATTTAGTAG
chr01	49804874	chr01	27.86	TATCATTCAAGTTAAAAAAATTGATTATCCTCTTTAATTGTAGGTTAAAAGATGCATTAGATTTATTTAGTAGATTTTTATATTAAAAAATGAATATAAAA
chr01	49806910	chr01	27.86	AAGATGTGTGTTCTTGTCTTAGTCGAGGTGTGATGTATAATCTGATCCTGGCCAATTGGTTGTTGAGTTATGCCAATCATTCTTCCACGTCTCACGATCTG
chr01	49806912	chr01	27.86	GATGTGTGTTCTTGTCTTAGTCGAGGTGTGATGTATAATCTGATCCTGGCCAATTGGTTGTTGAGTTATGCCAATCATTCTTCCACGTCTCACGATCTGTT
chr01	51262268	chr01	27.86	TAAATATTTATATTGTTGATATATATCTTAAATACTAAAGAAATTGCTTCTTGCCAACATCAAATGAATTAGAGTTCATCTCAGTTTTTTATACTATCAGT
chr01	51263021	chr01	27.86	TCTTCTTTTTAATTTCCTCCACACTATGCAAAAGTTATGTCTGTCCATCTTTCCCACCAAAACATTAGATACATATTAACAGCAAAAGTAATTTTGATCGA
chr01	51295537	chr01	27.86	AAGTACATAGACTCAAAAAAACTTTGGTTCTCTATCTAGAGTTGCATGACGGAATAACAGAGATAAAGATGGATGACTCTACCCCCATATGTTCATAAACC
chr01	51299176	chr01	27.86	TTAGATTACAATTGTGGAACCACTTCATCTAAAAGTAGCAAAGAGGAACTTTTAATTGCATGATCTGCCTCTCCAAAAAGGTTTATGTTATTGAAGGATAC
chr01	51335913	chr01	27.86	AAGAAGTAAATTCTATTTATTTTGATGTCATAATTATATGTGCTTTAAAAATTTATTTTAAAGACATTGAAAGGTAATAGATAAAATATGTCAATAAAATA
chr01	51336170	chr01	27.86	GCTCTTCCACAAAATTTTCTTCATATCCAAGGCTCAAACCTGAGTCCTCTGATTAAGGATTGATGGGTCATATACATCTCACCACAACTATTATTGGTACC
chr01	51336373	chr01	27.86	CTTTATCCTTAACCATAAGTGTCAGATTCAAGTCTTGGGGCTTTCCATTATCCAGAGCTAATTGAGTCTCAATAAGAATACCAGACAACAAGTAAATTAAA
chr01	51366745	chr01	27.86	AGGAATAATTACTCATTTGTATTTTTTTCATTTGAGTGAGAAATTTGAAAGGTCAAGATTAAGAAATGAGAATAAGAAGATTAAATATATGAAAATTATAG
chr01	51399954	chr01	27.86	AATTTTTCCCGTTCATCACCTATCTGTAAATGGAAATAATCCCTCAATATGAATTAATACCACCATAAAAAGTCTATATATTAAATTGGACAACTATTTCA
chr01	51413768	chr01	27.86	GTAATATTGATTTAAGATATCTATGATATATGATTCAAATGAATATCGAACATAAGAAAGAAAGAAAAAATATCTTAGACTTATTCACAGACTATCTTTCT
chr01	51415888	chr01	27.86	AAATATGTCAGCAGAATAAATAGAATTTACTTCTTAGTAGTGAATTTTTTTAAGTACCATTTACTCCTGATTTTGATTCAAAACCAGAAAAAAAAGATTTT
chr01	51417105	chr01	27.86	CCTTCTCTTATAATATGAGTTATTTAGATATTTCTTATACTCATCCTCATCCATATCTCTTTCACCCCTTCAATTATTGTCCATGACCTCCCAAGTTTTAA
chr01	51579678	chr01	27.86	AATACTTCAATTTATATATGTCATTAATGTTGCACTATCGGTCCATATGTCCGTATGAGTACGTATACTAATCAGAATTTGAAGTTAAAATTAGAATACTC
chr01	51579679	chr01	27.86	ATACTTCAATTTATATATGTCATTAATGTTGCACTATCGGTCCATATGTCCGTATGAGTACGTATACTAATCAGAATTTGAAGTTAAAATTAGAATACTCA
chr01	51626018	chr01	27.86	TACTAAGTATGAGGGATATGCATAAAACGTGAAACATAATTATAAGGGACATAAAGGAAAACATGGTACACATTACCAAGCTAATATGTCTTGAAAAGCCT
chr01	51707666	chr01	27.86	TTAAAATAAATTATTTTTTTCTTCTTTGTCACTCCATCTTCATGTTCATGCCACTTGACCAACACTTGTAAAACCACTTTCTCCATGGATGCTAATAAATC
chr01	51714591	chr01	27.86	AATCCACAATACATTTATAAATATGTCAATCAAATTATTAGTTGTGAAATACTCTCTTTAGTTCATATTAAGTGAATTATTGGGCTTGTTTCATAATTTTA
chr01	51827689	chr01	27.86	AAACATATCAATATACTATACAAGAGAAAAATAATAATTCATAATCTCCTAGATTTTAATTTCCTCCACAAACTGCGATAACAATTAAAAAAACAAATAAA
chr01	52321526	chr01	27.86	TTGAACAAAACATGATGAAAAGTGGTAGTACTCCACTAATAAAGAAGTAACAGAAGACTATTGTTTTCATGCTTTAGCATATATTAGTGTAAAAAAGAAGC
chr01	52413995	chr01	27.86	TATTTCATGAGCTGATTTACACCTTATAATATGATCAAATAAACTAGAGGAGCTTGACCTCTTCAGGAAAAAACTTTGTCATAGCATTAACTTGCTTCCAC
chr01	52449173	chr01	27.86	TATGTCCCTTAGGAACTTTCACCTAAATAGGGAAAGACAGTACTTTTTTTGTTTGGGGCAGCATTCAAGGTGTTTTCTGCTTATTGCATTCCCCTGGTAAC
chr01	52473683	chr01	27.86	ACCACTTGAACCAGTCTTCAACTTTGTTCCATTAAATCATTGAACCATGTGCTCTGATACCACTTGTTAGGTTCGAAAGTAATCAGGACGTCATGCTGAAA
chr01	52473688	chr01	27.86	TTGAACCAGTCTTCAACTTTGTTCCATTAAATCATTGAACCATGTGCTCTGATACCACTTGTTAGGTTCGAAAGTAATCAGGACGTCATGCTGAAACTTAT
chr01	52473695	chr01	27.86	AGTCTTCAACTTTGTTCCATTAAATCATTGAACCATGTGCTCTGATACCACTTGTTAGGTTCGAAAGTAATCAGGACGTCATGCTGAAACTTATAATTGCA
chr01	52473701	chr01	27.86	CAACTTTGTTCCATTAAATCATTGAACCATGTGCTCTGATACCACTTGTTAGGTTCGAAAGTAATCAGGACGTCATGCTGAAACTTATAATTGCAAAACAA
chr01	52495364	chr01	27.86	TGCATATGCATCACAATTTCCCTTAATACATTCTCAGCTTTCACCTTGCCATGTTGAAATCTGATTCTATTTCGTTCCCTCAAGATGATATATCAACATTT
chr01	52533638	chr01	27.86	TGTTAAGAGTTTGATTTTTATATAATGTTTGCTATGCTTGTCAACCATCAAAATTTTGAATTCAACATAACTCAATAAAGATAACGAAAACTCATAAAAAG
chr01	52537292	chr01	27.86	TTCAATTTATGTTGGAGAGTCAATCAAATTTTCCTTTGATCGTAATTTTTTTGTCACGAGTCCAATATATGTTCTCTATCTATCTCAATTTATGTGACACA
chr01	52808553	chr01	27.86	CATTGATTTCAGAATTTAAAGTGAGTCCAAGTATATTTTTCAACATCACTTAAGAAGAGTTTTAAGGGAACCCTATGGGTCCCAAATGCATTATTTTGCAT
chr01	52862198	chr01	27.86	GTCATTGTCGAAGCATAAGAAAGTGCTGCACTTTTTATTGCACCGAAGAAGTAGATAAATTGTGTTATACCAACTTCATTGATCCATCTTTGGTTGAGTGG
chr01	53303037	chr01	27.86	TCTATATGGTAAGAGGTGTAGGTATCTTGTTGGTTGGTTTGAAGTTAGTGAGGTTTCTTTGATAGGCACTGAGTTGGTGCATGAGACTATGTAAAAGGTTT
chr01	53578312	chr01	27.86	ATTTTGACTTTCTTATGTTGACTATAGGCTTAAATTGTAAGAACAAAATTACACTTCTAATGCAACCCTAGATTATTCTTCTAAATGTCTATATATGGTGA
chr01	53583998	chr01	27.86	ATTTTTTATAATAAAAATGTATACAAAAAAAGTTCTACAAATCAACATAGCGAATGAATCAAAATATTTTTTAAAAGAAATTGTTTGACTTCTCAAATAGT
chr01	53653068	chr01	27.86	TTCCAAATTGATTTCTAAAAATGTTAGAAGCGTTTCTCTACTTAAACATATTAGATAATATATACCCTTTCCTCTCTAAATGATTTTAAGTTATAAAATTT
chr01	53752818	chr01	27.86	GTCAGGCGAGGACACGAAGGACAAGGGAGTCTTGGAGAGCCTCTTCTTGAGAAGAAGAGATAAAGAGTTGGTAGTTTGGTAATCTTAGTGATGTTGAGAGT
chr01	53752846	chr01	27.86	GTCTTGGAGAGCCTCTTCTTGAGAAGAAGAGATAAAGAGTTGGTAGTTTGGTAATCTTAGTGATGTTGAGAGTGAAAATAACAAGTCTTACTGCAACCTGA
chr01	53752864	chr01	27.86	TTGAGAAGAAGAGATAAAGAGTTGGTAGTTTGGTAATCTTAGTGATGTTGAGAGTGAAAATAACAAGTCTTACTGCAACCTGATGTATAGTTTTGTTAGTG
chr01	55151622	chr01	27.86	TCTTCAATTTTTTGAATAAACCTCAGTAAATAGTTGTTTAGTGATCGTGGGCATATTTATATGCTTAAACGCCAAATGAAACTGTCACGATCCAAAATACA
chr01	55151641	chr01	27.86	ACCTCAGTAAATAGTTGTTTAGTGATCGTGGGCATATTTATATGCTTAAACGCCAAATGAAACTGTCACGATCCAAAATACACTCTAGATATGACATGACA
chr01	55214391	chr01	27.86	TTGAAATCTGTAAGTATAGTTTGCAAACAAAGATTCAAAGCATAATCTAGTACTCTTACTAGCTTGAAAGACAACAACTCTTGCTTAAGGTGTCTATAAAT
chr01	55283024	chr01	27.86	GGTAAAGACCTCAGCATCATAAATCATCACGTGTATCATCACGGTGTTCATAATAAATGCACACAAGAAATATCACACCACATAGAAGAGACAACAAATTG
chr01	31039837	chr01	27.88	TTTAACACCTTCTCACTTTTAGTATTTAGTATAATATAATATCATTAAATACTTAATATTTAATTAATTAATTATTTAATAGTATTATGATTGAATGTAGG
chr01	36050566	chr01	27.88	GCATAAGCAACAACATTCCCATGTAGCATCAAAACACAACCAAGACCAATTAGTGAAACATCACAATAAACTATAAAACCATTGGATCCTTCCGGTAAGGT
chr01	37260059	chr01	27.88	GAACCGCTATGACAGAATGACTTAATCTATAACTTGAACAACATATATTAATGATTTGATAATGAAACAATGTTGTAAGATCCCATATTTTTTCTCTATGC
chr01	37672007	chr01	27.88	TAAAACAAGTCCACTCAGTGCAAGATGTAACAGAGTGAACAAACACGTCCGAATTTTAATTACGAAATCATAAGAAGAATCAGATAACATTAAACTACTAG
chr01	46324179	chr01	27.88	AATTTCTTATGTTGTGAATTGTTGAATTTTTGAATTTTTAGGTATGTGGAACATATTTTGGCTTCTGAGAGAGAGAAAATGAAATGCTGCAGTATTGAATA
chr01	48857948	chr01	27.88	TGCATCAACTATTGAAAGTCGGAGAGAAGTTCTCCAACAATTGTATGTTGATGAGATGTGCATCAACTATTGGAAGTTGGAGGGACATGTTCAAGGTACAT
chr01	50137826	chr01	27.88	GGTTTCCCTTCGTCCAAATAGATTTAAGTGACATGTCACATGAGTTTTACGAAGTGGGCTTGCCATTTTGACAATTGACCTGATCCTATTAATTTTTTTGT
chr01	51415881	chr01	27.88	AAAATATAAATATGTCAGCAGAATAAATAGAATTTACTTCTTAGTAGTGAATTTTTTTAAGTACCATTTACTCCTGATTTTGATTCAAAACCAGAAAAAAA
chr01	12567094	chr01	27.94	TACCGACCAAGCTTTTTTCGAATTATGAGTTGAGGTTGGTTTTGGCAGACAATTCCAAACTTGTAATGGACCAAGGAGAACGAAAACAATCAATATCTGTA
chr01	12573538	chr01	27.94	TTGAATTCAGATGCATATGCGAAACTCTATTTCAAGTCCGCTAATTTTCAGCTAGTGTTTCGTAAACCAGCTCAAGTGTTAGAGGAGGGCCCTCCTTATAC
chr01	12573540	chr01	27.94	GAATTCAGATGCATATGCGAAACTCTATTTCAAGTCCGCTAATTTTCAGCTAGTGTTTCGTAAACCAGCTCAAGTGTTAGAGGAGGGCCCTCCTTATACTA
chr01	12573541	chr01	27.94	AATTCAGATGCATATGCGAAACTCTATTTCAAGTCCGCTAATTTTCAGCTAGTGTTTCGTAAACCAGCTCAAGTGTTAGAGGAGGGCCCTCCTTATACTAG
chr01	12573555	chr01	27.94	TGCGAAACTCTATTTCAAGTCCGCTAATTTTCAGCTAGTGTTTCGTAAACCAGCTCAAGTGTTAGAGGAGGGCCCTCCTTATACTAGTGTTACACAACAAC
chr01	12837854	chr01	27.94	TTCCCCTGATGGAAAGAAATTTTGAACTTCGTCTTCATGAAAGATCCTCCCTTTTCAGTTGTGGCCATCTGTGGAAATAATGTTTTAGTTCTTGTATACAA
chr01	12887427	chr01	27.94	CTTCTGCTCTTTCTCCTTCTCTTTCTTCATATTCTTTTTGAAAAAATTCTAGTTCTACTTGAGAAGAAGAAACTGCTTCAGATGCAAGTTTTTCTAAAAGA
chr01	15348167	chr01	27.94	CCTAAAAAGTCACATTCATTTTAATGCATCCCATGCCATGTAAATAATCACGAGGCTCGACAGATGATCCTCTTATCTGATCGTCAAAAATCAAACTTGTA
chr01	16104402	chr01	27.94	GTGAAGAGACTTCAATTGTTAAAATGAAATTTGAAATAATTAAATACTCGGTATTTTTGGACTATTGTTACAGATTCGACAAAATAAAGGATGACTTTAAC
chr01	16931277	chr01	27.94	TTGTTATTTTTCCTTAGACGAATCATGCTTAGTTGAATAAATTGAAAATCGTTTACAAGTATATGAACTATATCTTTGTTAGGTGTAAGATAAACAAGTGA
chr01	30584005	chr01	27.94	AAAATGTCCTCCTTCCACTTCTTGGATAAAATTTGCCCCTCCTTCCATCTATTGAATAAAAACTCTCCTTAACCTATCAGAAATTATTCAAATTTGCCCCT
chr01	38731129	chr01	27.94	ATGCTTGATAATGATGTCAAGGTAGTAAATTTGGTTCAATTAATAATTGTGCCTTTTTTATTTATGAATGAAAATTAACAAAAAGCTTACATTGTTGTTCT
chr01	39936591	chr01	27.94	TTGTTGGTCAGCAAGCTTTTGTTGCACATTTTCAAAAACAAGTGAACCTCATTGGCTTATAGATGCTGTGAGTCTTGCACACTTACTTCTTATACATGTAC
chr01	41883561	chr01	27.94	CGTGGTTCGAATTAGAATGATCATACGTCCACTAGAGAACAGTTGCCTGTATATTAACAAAGAAAATGAAGAGATCCCAAATACATCTAAGAGAATTGCTC
chr01	45027205	chr01	27.94	AGTTTGATTAAGACTAATTTTTTATCACACATCCAATGTATTTAGTAAATTGTTTCAGATGCATGACCACATCAACAATTATTCTTGTTATGGAATATATA
chr01	47599798	chr01	27.94	TATTTTTAGTATTATGACTATTTACTACTAAAATTATATGTTTTATTATCGAAATTACTAATACAAGCATTTTACACCATTTTTTTAAAGTAATCGATTAT
chr01	47729328	chr01	27.94	TTATAAGTTGACAACAAAGCACATGTGTCTATCCCATAAATGCAACTATCATATAGTTGCAAACGATCCACATGGCAGGTGAACGAGCTCATATTCACCTT
chr01	51287161	chr01	27.94	AAATACATATTATATATGCATTTATTAATTTGATGTAAAATCAGTGTAGGAGAGTCATTCTATGTTCAAGAGCGAATCTAATGTGTAAAAGATGGTTTAAT
chr01	52870851	chr01	27.94	AATATGGGAAAACATGGTGTTTTATTGAAATCTTGTGATAAAGATGAAATTATTTCCCTTTTAGCTACTAGAAACACTAAAAATGTGATTGATGATGAATG
chr01	52873444	chr01	27.94	ATCTCTCAAAGCCTATGTTACTATTGTTTATGCCAGAAATACAGCTACTGAAAGAACTCCACTATGGTCTGCTCTAGTGAGAATGGGGGCTACAATCACAG
chr01	55283041	chr01	27.94	CATAAATCATCACGTGTATCATCACGGTGTTCATAATAAATGCACACAAGAAATATCACACCACATAGAAGAGACAACAAATTGTACAATTCAAGTCCACA
chr01	21337753	chr01	28.06	CAACACCAAGGAGGGAGTTACTTCTGTATGATTTACCTCCGATCAAGTTATCACCAATTGAGGGTGAAGTAATGTGACATTCTGGAGATGACTTTTTAAAA
chr01	23151254	chr01	28.06	ACTTTATTACTTTCACGACTGCGTACACTTAGGTGTACGTTTGGACACAAGAAGTTTTTTGTCCACGGAAAAGTGTACGCGGTAGTACATGTAATAAAATA
chr01	23151284	chr01	28.06	AGGTGTACGTTTGGACACAAGAAGTTTTTTGTCCACGGAAAAGTGTACGCGGTAGTACATGTAATAAAATAGTTATTTTTAGAAATAAGATGCCGAACCCA
chr01	23151294	chr01	28.06	TTGGACACAAGAAGTTTTTTGTCCACGGAAAAGTGTACGCGGTAGTACATGTAATAAAATAGTTATTTTTAGAAATAAGATGCCGAACCCACAAAGAATTG
chr01	44430755	chr01	28.06	GAAGTAGCCTACAAAAGTTAGTAATTATACCAAACAATCAAAAGTTGAGTAAAAAAACAACTTATAAATTCAATATTAGGCACCTAACACTACATAAATCA
chr01	17453154	chr01	28.08	ACCAATATGTCATTAATGAACACAATCACAAACATGTCGAGTTATTGTCTAAACACCATATCCATCAAATCCATAAATGCCACCGGAGCATTATTCAAACC
chr01	20947172	chr01	28.08	TTTGTATTAACGTATACTCTTGCCTAAATTTCTTATCCAAATGTAGGATCCGACGCTCCAAACTCAAACTTCCATAGCTAGGGACTAGTAGTTGAAGTTGG
chr01	27412371	chr01	28.08	ACCTTCCAATTTTACTCCACAACCCCTAGGAATGGATGTTGCTTAGTCCAGATTTAAGAAACATGAAGGGTTTGACCACTAACTCTTACATACAAAATTAC
chr01	23152543	chr01	28.13	CAGATCGAATGGCGTCAATACATTTAATGTACGAGTATATATATAATATAGCTGAGTAAAACAGAAACTATATTGAATGACTGAAAGCAACTCAACTGAAT
chr01	35984989	chr01	28.13	TATGTGTACTCGTTTCACACATGGTTGGTTCGTATGGCCTTGTTGTTCTTCGAGGGTTGTTAATGTTCTGTAACATTAAATATATTTTTGTTAATTGTTTT
chr01	50486695	chr01	28.13	ACTTAAGATTCACGAGAAGAATTACCCAACCCATGATCTAGAATTGGCTGTCGTAGTATTTGCTTTGAAAATATGGCGTCACTATCTTTATGGTGTTCTTG
chr01	51626033	chr01	28.13	ATATGCATAAAACGTGAAACATAATTATAAGGGACATAAAGGAAAACATGGTACACATTACCAAGCTAATATGTCTTGAAAAGCCTTTAAGGAAGGTTCAT
chr01	8191451	chr01	28.13	CTATTTTTCGATGCATCTTATTTTAATTTCTTTTTAAATATTATCAAAATATGTTCTTTATTTGTTTATTAAAAAAATATTGATTAAATATATTTAAAAGG
chr01	8505541	chr01	28.13	ATTTGTCTCTCCTCATCACCATTTTCATCATAAGTAATTAGATTTTTACTGAAAAGTTGTTAAAATATAAAAAGTAAATATGCGGCAAATTTCAAACTTGT
chr01	8505571	chr01	28.13	TAAGTAATTAGATTTTTACTGAAAAGTTGTTAAAATATAAAAAGTAAATATGCGGCAAATTTCAAACTTGTCGGGCCTTATCTATTCCATCTCTCGAGCCT
chr01	17434665	chr01	28.55	TTCATAACTAATCATGTGTTATTTATAGTTGCATAAATCTAACCAACACTCCCTAAATTTTAAGATTTAATAATCCTCTAGACTATTTTAAACTCAAATTA
chr01	17434669	chr01	28.55	TAACTAATCATGTGTTATTTATAGTTGCATAAATCTAACCAACACTCCCTAAATTTTAAGATTTAATAATCCTCTAGACTATTTTAAACTCAAATTATTAA
chr01	17434683	chr01	28.55	TTATTTATAGTTGCATAAATCTAACCAACACTCCCTAAATTTTAAGATTTAATAATCCTCTAGACTATTTTAAACTCAAATTATTAACCCCTTATTTAAAA
chr01	17434757	chr01	28.55	CTCAAATTATTAACCCCTTATTTAAAATATTACTTATTATGTATTACGTAATTTGTCTCTGCTTCACGCTATCATACATACCTTATTAAGTTTAAGAAACG
chr01	16613824	chr01	29.36	CATACTTACTACTTAATTGTGCTAACCCATATTTCTCCATTTTTACCAAAGTGTAGGGTTGCGCAGATTTCGTGTTCCTTACTTGAAGAATAGGTTTCTAA
chr01	17556922	chr01	29.36	GGTAGGGTGTTACGACCCAAACCATTGTGATTAGCACCCACACTAACCCTCTGGTGGGAGAACCATTACTACAATCCCTCTAACCAAGTTAACGAACAAAA
chr01	17686697	chr01	29.36	TCTTAAATTTCTTTTATAATTTAATGTCCTTTTCTTATTTATATTGGAATGATTATAAATGTTCTTTTTATTCTCCAAATTCATATAATTTAATTTGATGA
chr01	18725347	chr01	29.36	ATTATGTTAATGTTGAGGCAAAAGGTGATTACACATGCTCTCCATTGAATAACAAGATGCGATTACCCATGCCATGTGATGTAAGGACAAGAGGCGATTAC
chr01	18923338	chr01	29.36	ATTGGGAGGGAAAACGAAGACGATAATATTCTTTTGAGATGTCATATTTAGTGCTACAACTTATCACTTAATAGAATATCAATTAATCATGATCACAATAG
chr01	20944721	chr01	29.36	TTTCCTTGTATGGTTCTTAATGAGGCCGCCTAAATGTGTATTATTAGATACATGTACTCTTTTCCTTCAGTAGAATTTTCTTTTTAAAGTTTTTTAGTAAG
chr01	20945139	chr01	29.36	TGAAAGTTGAGGTCTACGGATGGAGTCTATGGACCGTAGGAATTTAGACAGTCCATAGAAATAAGTCGTAAAAACAACCCAACATTTTATCCCCAATCACT
chr01	21342028	chr01	29.36	TGCTTTATATATGTTAAGCTTGCACTGACCATGATTATGATCGGTATTATCTAACCTCTTATCTTATGATTTAGACTGGTAATTGTATGTTATGAAAAGTC
chr01	21346726	chr01	29.36	CTTAGCCTATTCGGGAGTTCAGTCCTCTTTACTTGATCATACCTGTAGCCATAAGTTGAGGATGAGGCCTTGGTGGTACTTCGAGATTGAGTGTTAGCAGG
chr01	21655643	chr01	29.36	TAGAAAGAAGAAGTTAAAAGAGTAGAAACAAATAAAACAGTGAGAATAGTGGTTGATTGAGGCATGTAACTAGAGTTATGTATCTCTAAGGTAGGTAGGTA
chr01	23137035	chr01	29.36	TAGGGTATAAATATGTTGAAGAAACTAAAATCAGTTCTTATATAGCATAAAAAATAAGCATTATTTTAAAATTTTATGAAATATGTGATAAAACAATGAGT
chr01	23199187	chr01	29.36	ACTTTATCGTAAAAGCATCCTTTAGTAATAAAACATGCATAAATCCATAATCATAATTCCTAAGTTCGTAATCATAGTTCATAGTTATAAAGTAGGCATAT
chr01	23530690	chr01	29.36	ATGGTTTTCCAGAAAATTTGTTGCTATAATATTTATATTGTAACCTTGATACAATAAACAAAGGGTTGGCTGACCAACTTATTGAAGGAGAGTAATGCGAC
chr01	27412557	chr01	29.36	ATTACAAAAGATTCTATCTACCCTTTTAGAAGTTCAATTTTCCTGAATTCTTCTATTCCACCAAGTGTAAGCACTACTAGTAAATTTGAGCTGTTAAGAGC
chr01	28809105	chr01	29.36	TGAATGATTCTAGACAAAATCTTATTTACAAAATTACTCAAACTAATAGGCCTTATATCTAAGAAAGTTTGAACATTGTCCATCTTAGGTATAAGGCCCAA
chr01	28940630	chr01	29.36	TAGAGAAAGGATTATTTTTAAAAAAAACAATTCACCACAAATAATTGTGTTTTTCTTGAATTAGTTAAGAATTAGAATTTGATTAGTATATAAAATAAAAA
chr01	28940842	chr01	29.36	TAGTATTTAAAAATTCTGAAAAGGAAAGAAAGAAATGAATTTAAAAAATCAAAAATCAAATTTTAGAGAATTTCCAATGTGGCTATGACGTGGCACTTATG
chr01	33524880	chr01	29.36	TGATCGTACATAGCTGTATTGACACCATTCGGCCTTTATCTTTCATGAAGCAAATACAGGCAACCATGATCAACCTCCTTCGTCGATCGAGTCAAGTTCCA
chr01	45156980	chr01	29.36	ATACATGGCATGAAAAAGTATATCAAACAAGGTGCTACTAATACACATACCTAATACATGTATTATATTTTCTAATACACTCTACCAAACGACCCCTAATT
chr01	46561974	chr01	29.36	ACTGCAAGATGCTCGCGAGATCTATCACCCTCACCCCCGATGACATCTGTATGCAAATTTACATGGATAATATATAAAAATCATAAATTAAATAAAATTAG
chr01	47261847	chr01	29.36	TCAAGAAAAATATGCAGAATAATCCCTAAGAATTTGATTATCAATAAGCACTTAATATACCTCAATCATCGCAATTAAGACATAATACAGACTCCCAATCC
chr01	48797013	chr01	29.36	ATAATCTATGTCTAAATGTAGTAATTCCAGATGTGTTGATGGAATGTGATATTTGATCCTTGAAGGGTAAAGTATGAGAATTGTGCATGATTATAAGACTT
chr01	49315797	chr01	29.36	CAACTATAAAGTATTATATAGCAAAGTCATTTAACCTTTTTATGGTCATCCACTTTAGATTTTTTTTCTTATAAAATCACTTAACCAAATTTGTCTTAAAT
chr01	49315813	chr01	29.36	TATAGCAAAGTCATTTAACCTTTTTATGGTCATCCACTTTAGATTTTTTTTCTTATAAAATCACTTAACCAAATTTGTCTTAAATTTTTTTACTTTAGCTC
chr01	49817987	chr01	29.36	GTGATGAGTTCAATTACTCTATTTTAATTGATTTTAGTGATTGCAAAGGGGATTAAATGAAAAAGGCAACATGTTGATAGTTGTGTTTTGTGAATTGCCTT
chr01	49818008	chr01	29.36	TTTTAATTGATTTTAGTGATTGCAAAGGGGATTAAATGAAAAAGGCAACATGTTGATAGTTGTGTTTTGTGAATTGCCTTGATATTGATCCTAATTTGTTG
chr01	50073764	chr01	29.36	CGTGTTATGTCATAAATCTTGTGTGTGATTGACCATGCATGCAACGCCAAACTCAATCTGCCAACTGTTTCAGGCTTCAATTTTTTTTGTTGTGTCTCATG
chr01	50741342	chr01	29.36	GTTAATTAGTAAATTAAATATAATCATATTCTCAAAATTTAAATTAGAAATATTTGATTAAAAATATAAAAAATACTTACGATTATATCATAGTCTTTAAT
chr01	53752838	chr01	29.36	ACAAGGGAGTCTTGGAGAGCCTCTTCTTGAGAAGAAGAGATAAAGAGTTGGTAGTTTGGTAATCTTAGTGATGTTGAGAGTGAAAATAACAAGTCTTACTG
chr01	54422561	chr01	29.36	GTTATAGTATAATCTTTATCATTGCATCAAAAAAGAAAAACCCAACCATAGTTCAATATGAATTGATGTTTAACTATTTTCAATGTAAAATTTTAACTAAT
chr01	61288730	chr01	30.87	AAAAAGATCAGAGTAATGCTCCTCCATGTTGAATAATTGTCTGTTTCAAATGGTTTCCTTTATCTCAGTGTCCTTGTTTTTCATGAACTTTACAGTTTAGT
chr01	61505635	chr01	30.87	TTACTGAAGTAATGTCAAGTGAACAAAATGACTCCTCTCTTGCTCCTTCAATTATCCTTTTGAAAACATCTTTAACTACTTGATGCTGCATCTGTGATTGG
chr01	61851419	chr01	30.87	CACAAAAAGAACATATTATTTCAACTAACAAGAACTCTCTTTTTACTAATATTTATGCACTCTCTATTTTCTTGTGCTCTCGACAAAGGAAGAACATCACT
chr01	62199994	chr01	30.87	ATAGGTCCATAAGAACCTAGTAGTACTAGCTTTTGTTCATACATTGTATATGTTTTAAAATATTTATTAAATATTTCATTATGAATCCAATTATCAGTAGT
chr01	62219815	chr01	30.87	TGATTTCTGATCTCGAGATGTATATATTACTCATGATACATTGCTATTTTTAAAATATTTAGTAAATTGTTAAGTTTTATAATCCTACCTGATACATTAAA
chr01	62246722	chr01	30.87	ATATAGAAGGGAGAGGGTATTATCACAATCTGATGCTTCAGATGTTCTTAGAGAGGCGTTCTCTCAAACGGAAGCAAGTATAGACCACCACTATGAGGTTT
chr01	62264018	chr01	30.87	TTTAGTAGGTAAATTAACATCCCAAGTCGTGAAAGATTTTTCGTATGCCCTGAAAGATAGATTGTTACGAGCTATACATGGTATTCATATATCTATTTCAA
chr01	62264100	chr01	30.87	ATTCATATATCTATTTCAAAAGAAACTGATCTAAAATTACCTATAAGTGGCAGGGGTCAGATTATTGGTGTGAGGTGGATCCAGAAAAAGAGTGATTCTAA
chr01	62264105	chr01	30.87	TATATCTATTTCAAAAGAAACTGATCTAAAATTACCTATAAGTGGCAGGGGTCAGATTATTGGTGTGAGGTGGATCCAGAAAAAGAGTGATTCTAATTATA
chr01	62278141	chr01	30.87	CTTTTATTCTAACTTTTCACCAGGCATGTTGAAGACCATAAGATTAAAGGGCATTTTGGTACATTCTACCTATCTTTAGTTTAAGACCACAAGTTCCAAAG
chr01	62429824	chr01	30.87	TTTTTAAATAATTTTAAATAATATATATTACCCTCTATGTCTTAATTTATGTGGCACAATTAGAATTTGAAGAATCAATCAAATTTTATATGCTTTTAAAA
chr01	60782419	chr01	31.74	GTCATCATATTGACGAAATTTTAAAATTTGAATATCTCACAATCAAGGATCCACTCGTTCTGTGGAATAACCTTAAAGAAAAAAAATGATCATTTGAATAT
chr01	60861630	chr01	31.74	TCATCTCCTATTGCATGAACATTCTCCACATTTGTTTGTGCATTTCATTAGTCGAGGTGGTAGATCACTTCCTGTGACTATGTTCGTTCAAATTGTCCGCG
chr01	60925512	chr01	31.74	ATGAGAAATATGGTTCGACTCTTATTAACTTAAGAACTTTACATATCGGAGGAGATTTCTCACTTACTACAAAATATGTGTGAGCTTCGTGTCATGAAAAA
chr01	60925524	chr01	31.74	GTTCGACTCTTATTAACTTAAGAACTTTACATATCGGAGGAGATTTCTCACTTACTACAAAATATGTGTGAGCTTCGTGTCATGAAAAATATATTTGTCTT
chr01	58072735	chr01	31.82	TCTATATGATTAAGATGTCGTCTCTAGATGTGAACATTGAATGATTAGGATAGTTTATTTTTCAATATTTCAATTTGCAAAATTTATTTATTTCTAAATAT
chr01	58123206	chr01	31.82	AACAATCAGTTTGGTTGATTTGAACACTAAAAACCTTTTTTTTCTATAAAAGACTCTTTTCATAAATTTTAAGTGAGAAGTGTTAAACTATTTATTTAACT
chr01	58170876	chr01	31.82	GGTCTAACTTTATCCTTCGCTTTCTCTTTAATCATATAATCTTTGATAATGTGATAATACATCTAAGAAATTATTCCACCAACATACTACCAGTAATTCGA
chr01	58187343	chr01	31.82	TGCTTTTTTAGAATATTACGTATTTCTAATCCAAAAATAGAGCATAAAAATTGACCTTCTCTTTTAACGTCTATAAAGAGAAAAAGATCAAAACATTAATT
chr01	58201959	chr01	31.82	CCGTATATACAAGTAAAATGATACACAGAGTGATTAAATAACATATTTTGAATATCCTTGACACAATAGGTTGTTGTAGCCCAATGATTTTAGACCTTTTG
chr01	58454265	chr01	31.82	TATTTTACCTTTTTTAAGAAAATAAAATAAATACAAAAAACTACTTTCATAGTAATAAAAACAAACAACTAGACTACAATAATAACTAAATAAGAAAAATA
chr01	61152871	chr01	32.46	TCACTAAAGCCGTTTTATGCTGAAAACTTAAAACTAAAACGTCTAATTAAAAAATGAATAGTCTCATCTACTGCACTATAATCTCTGATGTCTTGAGAGAT
chr01	61178864	chr01	32.46	ATTAAGGAAAGAAAGGATTAATCCCAAAACATGGGAGCGATGAGAAAATCCAAAAACCGTTGGGAAGTATACTAATTAGCTATGCAGCTAAACCAAAGTGC
chr01	61225463	chr01	32.46	ATTTTTGTAACTGGTTGAGCAGAAGGTTCTCTTTCCACTTTGGCTAGATTTCTGAAATATGGATCTGCGAGAGCCTGAATTTTGAACAAGGAAAAAAGCCC
chr01	61230515	chr01	32.46	AAAAATTCTATTTTTCTTAAATATATTAATAGATACTCTCAATCCATTCTATCGAATGCTTTTGTCATGTCAAATTTCATAACACTATATAATTTCTTACT
chr01	61230520	chr01	32.46	TTCTATTTTTCTTAAATATATTAATAGATACTCTCAATCCATTCTATCGAATGCTTTTGTCATGTCAAATTTCATAACACTATATAATTTCTTACTTTATA
chr01	61317424	chr01	32.46	TATGGGCATAAGATGGATATGTAGTCATAAATGATCGACAAAATTAGAAGAAAAAGATTTGGTCCATTCTATCATTTTAAGAGGAAGGATAGAGTTCTTTT
chr01	61346904	chr01	32.46	GCTGTTTTCAATTAACTTAAAACAGTACACGGATGGCAATAATGAATGGCTGGCAAACATTATATTATAATTTATACATACTAATTAATATTACCCTCCAT
chr01	61363857	chr01	32.46	TTCCTTTTCTAACTGGATTTCATTCCAAAGATTCAAAATTAAGTCCACTAAAATAGGAAAACAACATCAGTAACATCAACACAATGGTTCCGCGAGATCTC
chr01	61376285	chr01	32.46	ATACGACTTGAGCGTACCACCTATATTCGACTGATCAAAATGATTGACAATTTTATTAAAAATAGATTTTCAATTTTTTTTATCGATTGTAAAATTGTATA
chr01	61379127	chr01	32.46	TTTCAAAACTCATAATAAGAAATGAACACAAATTACTCTATAAGATATATATACCTACCATTAGTAATAAGTTCCCTACACTTAAAACATGTAATTTACAT
chr01	61601283	chr01	32.46	TTGATTAATAAATAAAATTATTTACTTACAAAACAAAATTTCAAAATTAGAACTTGTATAAATTCGAAAGAACATGTGAAAGTATGAATCATTAGTTGTCT
chr01	61630390	chr01	32.46	AATATCGTAATAATAAAACAACAATTTAAAATTTTAGTTCAATATAATAACGCAATATCTATCATACCATATCCACACCTGTTGTAAAATAGTTAAGTAGG
chr01	61630406	chr01	32.46	AACAACAATTTAAAATTTTAGTTCAATATAATAACGCAATATCTATCATACCATATCCACACCTGTTGTAAAATAGTTAAGTAGGAGGAAAAAAAAGGAAT
chr01	61771750	chr01	32.46	TCAAACTTTACACACGTCTTTGATAATATAGTCAAAAGATTAGTTTTTAATTGCAATAATCAAACTTCAAAGTAAGCATATCTCAGAAGCACCTCTTTCAA
chr01	61164782	chr01	33.01	AAAATTTGATGACCAGGACATCCCCCCAAAAGAACATTTCAAGTATCTTGGTTTTTTAATCCAAATAAATCTGGAGATCGATGATAATGTCACATATCATA
chr01	61164783	chr01	33.01	AAATTTGATGACCAGGACATCCCCCCAAAAGAACATTTCAAGTATCTTGGTTTTTTAATCCAAATAAATCTGGAGATCGATGATAATGTCACATATCATAT
chr01	61164791	chr01	33.01	TGACCAGGACATCCCCCCAAAAGAACATTTCAAGTATCTTGGTTTTTTAATCCAAATAAATCTGGAGATCGATGATAATGTCACATATCATATTGGTACGA
chr01	61467865	chr01	33.08	CTCATTCACCTTGTGAATTATTGTCAGCTTTATCAGAATCCCCTGTACTATCCTCATATGTTTGCCGTTTAATTAGAAGAGAAGACCGTTTAATTAGAAGA
chr01	61467867	chr01	33.08	CATTCACCTTGTGAATTATTGTCAGCTTTATCAGAATCCCCTGTACTATCCTCATATGTTTGCCGTTTAATTAGAAGAGAAGACCGTTTAATTAGAAGAGA
chr01	61502762	chr01	33.08	GTATTAAATAATTATTATGTCACACCTCAAACTTTAAGAGTGTAACTGACTCTTGATGTCAAAATTTAGGCTTGAGCCGATCCTATTGAACCATTTGTCAA
chr01	61849959	chr01	33.08	TGGGTGTATCACTAGACTTGTAGCCAAATGGTACATTGTAAAGGAAAGGATAAAATATCAAGAAACCTTCTCTCCAGTTTGTAGAAATGGTCAGAATTAGA
chr01	58886825	chr01	33.55	TATTTTATAATCAATTTGTTTTAATAATTTCTTTTTTAATGATAATATAGTTAATTCATTCAATCTCTCTTGAGACATTGTTGATCTTAAAGAAGATTCAA
chr01	58889598	chr01	33.55	AAAGTAATATAAAAAATTATTGTCACTTATTTTAAAACAATTATTGATTGACTCGATTAGAGACAAATTGAGGATTCTAAATCGATACCATTTTCACGACT
chr01	58938283	chr01	33.55	TGTTAGCTTAAATTTGATTGGGGTATCAATCAAAAAAGGAAAGAAAATGCCTTTGTAACATTAGATAAACAAAAAACTTAAAAGAAAAACTACAAAATATT
chr01	58976606	chr01	33.55	AAAATATTTATAGGTAATTCTTTAATTAAAATGTGAAATTTGTAATTTTTAAAAAATAAATAAATTATCTGGTACAACAAATAAAGAAAATATAATAGTGT
chr01	58982780	chr01	33.55	GTTCAGAACCGATCACTATAACAACAACATTGGTTCCAAGAAACAAACATTATGTATGCTCATTATTAACAAGCTTATTATTTTTACAATAGTTGTTGTTT
chr01	59160231	chr01	33.55	CAAGCTACAATTCGTAAGTCCTGCATTTAGATAAATCACATTATGCTGGTTTAAAATTCCATGTACACCATCTTTTATGTGCTAACAAGATTAGATGTGCT
chr01	59175235	chr01	33.55	TCTAGAGTATTCCCCAAACCTCTCTAAGACTCTAGATCCTTTCTACTAAGACTAGCTCACTTATGCTTTAATTTTATGCCTAAGTGGTATGACAAAGTGGC
chr01	59182229	chr01	33.55	ATTTGCAAGCGAAATATACAAACCGCAACTTATAGCAAACATAATTATAGTTGTGGAGCGCAATTACCGAAAATCTGAAACTATAGCTATAAAGTCTTATT
chr01	59182379	chr01	33.55	AAGATTTATTATTTTGTAGAAGGACATAGTAATGCTTTAAATTTTATTTACTTTTCAAGTTTTTGTTTTCATGTATTTAGGTGTTCCCTTGTCTACTAGGA
chr01	59238101	chr01	33.55	CATCATCAATCTAAAGTTGTGGAACAAAGCTGTTATATTCAAATGTTATTGGGATCTAGAACATAAGCAAGATAAAACGTAAATTAAATGGGTACACATCT
chr01	59274717	chr01	33.55	AAATTGAGAGAAGTGTTGAAAACACCTGTAAACTTGGCGAGAATTTAGGGATATATTTCATTCATGTTACAAGATCAGAAGTGTATAGTTAAGTTCGGTTA
chr01	59274744	chr01	33.55	GTAAACTTGGCGAGAATTTAGGGATATATTTCATTCATGTTACAAGATCAGAAGTGTATAGTTAAGTTCGGTTAGTCAAGTAAAGGATTGTTTTAATAATT
chr01	59286458	chr01	33.55	TCTGTGAAAATAGTTCACCTGCATTTCTTCAATAATTCAAAAGAATAGAGTTCCTGCAGCAATTTAATCTGAAACTCCAAGGAACTGAGCGAAGCTTGGAT
chr01	59302207	chr01	33.55	AGTCCTTGACTTAAGTAATAGTTTCATATTTTAAATTCTAGCCGTCTCAGTCTTTCAGTTATTCTACAATGTGTTAGTATTGTTTTTGAGTAAGATATAAT
chr01	60573120	chr01	34.29	TCAGTTCATTTCTTTCTGTATGTTGTATGAAAAAGATTCAATCTTTTGGAATTTGAAGCTAAAGGGGTTGTTTAGATTACCTCAATTCATTTTGATAGCTA
chr01	60573132	chr01	34.29	TTTCTGTATGTTGTATGAAAAAGATTCAATCTTTTGGAATTTGAAGCTAAAGGGGTTGTTTAGATTACCTCAATTCATTTTGATAGCTAGTGTTTTGATCT
chr01	60573246	chr01	34.29	TATTTAAAATTTGTTCTTCAGTTTGGTGTAGCATGGTTAGGTACTTTGAGGGGAAGTGACAAAGATAGACAATGAGCAGGTCTAGAAGGTTCTTGAATGAA
chr01	60583857	chr01	34.29	TGCAAGTTAAAAATATTTGTAGTGATGTAAACCCAAATGTTTAATTATACATCTGCAATTTCTTTTCATTTTTCTATTTTTAATGTGCTTCTAACATCTCA
chr01	60583877	chr01	34.29	AGTGATGTAAACCCAAATGTTTAATTATACATCTGCAATTTCTTTTCATTTTTCTATTTTTAATGTGCTTCTAACATCTCACTTTCCTCAGGGAAATGGTA
chr01	60731935	chr01	34.29	TGAAAAGAGAGAACATGCTTCCATGGATGATCAAGAAGGCAAAAAGGGGGACAATACTCACAAAGCCATAGTGAGATCATTGAGAAGTCTTTCTGAATCTT
chr01	60753462	chr01	34.29	GAGGATTTTTCTCAATTTTGATTCAAGGGGGATGCTGAACAATTAAATCTCGTAATCAAAGTAAATTTGTTTAAGTCGAAACAAGCTAACTTATCGTTCAC
chr01	60954711	chr01	34.29	TTATTAAATTTTTCCTATCCTCAATTTTCATGCCTAACCTTTATAAATATTTAAAGGTCCATAGTGTAGATACTTGTTTAGGAAAAAATACATAAGCTAGA
chr01	63046588	chr01	37.82	TCTAACACATTTCTCAAAGCATTAAATTTAATAAAGTCAAAGAATAATATAGTAAAATTACCCCTATTATTTATTGTTTCTTAAGGGGTGTGTAGTGACAG
chr01	63063846	chr01	37.82	TAGATGATGATTGATGAGTCTGATTTTTAGCGTTGTAATCCCCTCTTTTACTTCTCTTTCTACTACCCCAATTTTCTAAAATGTTTGAATAGAAATAATTC
chr01	63174223	chr01	37.82	CCATTTTAATTGTCACTAATAAATACACCAAAGTGACAAATTGCTTTGACCAAGTGTGAATAAGTTGAAAAGTCAAACAAAGCCGGTAAACAAATATTCAA
chr01	63174235	chr01	37.82	TCACTAATAAATACACCAAAGTGACAAATTGCTTTGACCAAGTGTGAATAAGTTGAAAAGTCAAACAAAGCCGGTAAACAAATATTCAAACATCCAGCATG
chr01	63197426	chr01	37.82	AAAAACTCTTTATGACTTCCACAGTTATATGTTCTGTTTAGAATCAACCAAAACGAAACTAGGATGCACACTACCTGTGGGGAAGTCCCTCCTGATATCTC
chr01	63240097	chr01	37.82	TTCTATTCTTAATACAAAATTATCCTTTATTTTATATTCTATGACACGAAGGTCAATGTTTGACCCACAGGTTTCCCAATAAATATTAAACAAATCATATC
chr01	63442598	chr01	37.82	AGGTAGTTTAGTGATCTTTTAAATTATCTTGGGTATTCCTCTTTCATTTCGAACTATATGTATACTTCTGAAATTTCCATTTCATATATTACCGGCATGAA
chr01	62982146	chr01	38.62	CTAATCTATTGGACATTTGAAAAATTAGACATTAATATTTGACATATATGATATAAATAGGAATGAATATTACGTATAATTTTTTGTATGTTTTTGGATAT
chr01	63391950	chr01	38.62	TGGAGAATAGTCAATCCAAGCTTGAACAAGAATGAAGGATCGCCTCAAACGCCGGAACCTACACTTTGTGGAAAAGGGTCGAAGAAATATGGGTTAGTACA
chr01	63391963	chr01	38.62	ATCCAAGCTTGAACAAGAATGAAGGATCGCCTCAAACGCCGGAACCTACACTTTGTGGAAAAGGGTCGAAGAAATATGGGTTAGTACAAACTTGCACTAAG
chr01	63739682	chr01	38.62	ACTTTTGGTCTCCCCTAAACTTTTGCCTATTTTTTAACATTAATTTTATTCATAATTTTGTGTAAGGAATGTCTCGTTGTCTTTTTATATATTTAGTAGAA
chr01	63767168	chr01	38.62	CAACACTTTTGATGTTCAAAATTAAATGAAACAATAATTATATGAAACCCGCTCAAATAGAATCTTAAATTTATTTTCACATGCAAGTTCAGAGAGAGGTA
chr01	63814858	chr01	38.62	TTGAAACTCTACTACAAGTGATTATTATCAAAGTGAATTTCATACGTTGAGTTTCACACAAAGGGTTTTTGATTGTGAAAATGGAGCTTCTTTTGTGGCCA
chr01	62866514	chr01	41.4	GCTCATCGCTTTCAGTCTTTAAGACTGTTACTGAAGTGGAGTAGGTTATATTTCACTTTTCACTCAGAATAATCTGCCTATAAACCCTTCTGAGTTTCAGA
chr01	62866515	chr01	41.4	CTCATCGCTTTCAGTCTTTAAGACTGTTACTGAAGTGGAGTAGGTTATATTTCACTTTTCACTCAGAATAATCTGCCTATAAACCCTTCTGAGTTTCAGAC
chr01	62866518	chr01	41.4	ATCGCTTTCAGTCTTTAAGACTGTTACTGAAGTGGAGTAGGTTATATTTCACTTTTCACTCAGAATAATCTGCCTATAAACCCTTCTGAGTTTCAGACTAA
chr01	64116303	chr01	42.25	GTTCTTAACTGGTTTGCAACTATTTGGGCGATACCAGGCACTGTGAAAGAGGTAATATTCAGCTGGAATTGTGGCCGAATGAGGAAAAGCGTACGACTTGG
chr01	64550020	chr01	42.25	ATAACAAAAATTTTGAATTCAAAATAGAGTGGAATATACTATATTCATGAGCATAATAAAAGTGAAATACATTATATTCACATCCATAATAAGTATATTCA
chr01	64641494	chr01	42.25	TAATAAATACTCTCTTAATTTTAATTTATTTGTGTAATTTTGATTTGGTATGAAGTTTAAAAAGATAACAAAAGTTTTTAAATTTTGGGATTTTAAATAGA
chr01	64942246	chr01	42.36	AAATATACCATTTAACTTGATCTCATTTTATATTTATACCCTCTAATTTTGAATGTGCACAAGTAGATACTTAAATTTGTATAAAGTTGAATAAATAGACA
chr01	64942348	chr01	42.36	ACACATCTTACGTGACATCTTACATGACAATTTGAGTCTTATGTAGAGTCCTACGTGTATTATGTCACATAGGACTCATGTGTCTACTTGTGCACATCCAA
chr01	64942369	chr01	42.36	ACATGACAATTTGAGTCTTATGTAGAGTCCTACGTGTATTATGTCACATAGGACTCATGTGTCTACTTGTGCACATCCAAAGTTGAAGGACATGAATGTAA
chr01	65145505	chr01	43.35	AATTTCAGTATTTGAACACATTAATCACTAGGTCTAGACGTGATGGAAAAAAAAAGTGTAATGAAGTGAACTTCAATTATTATTTTTTAAATCGTAAAATT
chr01	65145508	chr01	43.35	TTCAGTATTTGAACACATTAATCACTAGGTCTAGACGTGATGGAAAAAAAAAGTGTAATGAAGTGAACTTCAATTATTATTTTTTAAATCGTAAAATTTGA
chr01	65145509	chr01	43.35	TCAGTATTTGAACACATTAATCACTAGGTCTAGACGTGATGGAAAAAAAAAGTGTAATGAAGTGAACTTCAATTATTATTTTTTAAATCGTAAAATTTGAA
chr01	64818684	chr01	43.59	TCATCTTAAGAAATCATTATTTGAGTGTTTACTTTACCAAAGTCTTTTAAGACTTTAATTGATTTGAGAAATAATTACTTACATAATAATAAAAACAATAC
chr01	64937171	chr01	43.59	CGTCTTGAAGTTTGGTGTACCACTTACTTTTTTATGCCAGTAGATAAAAAGATATGTCCTATGATCTTTGATTAATTTTAGACTAATAATAACACATTGGA
chr01	64962222	chr01	43.59	TGATACTTTGAAAGGAAGATCCAAATAGAGCAATGCTGATTTAATTGTCACTTGTTGCTTCTGCAGTTCATTGCTGCAGTATCTCAAATTTGTCACCAACC
chr01	64974286	chr01	43.59	GACATTTATAGGTCTATTTTATTTTAATTGGACACACATGCCAACAAAAATTATGTTGATGAATCTTTAATGTACAATTGTATTCAATTAATATTTTTAGT
chr01	64984627	chr01	43.59	TGCAAGATGGTAAATTTGCTTCTTTGTGATGCTTTCTTTAAAGTAATCTTGCTATACTTGAATCTTCTTCCTTACCTCCCCATTAATCAAAGCCTTTCATA
chr01	65021878	chr01	43.59	GGAAGAAATATTTTTATCTTTAAAGAAAGAGAGAATTCAAAGTACTAGAATTAGTTAGAGAGGAAAACTAAAGAAGCAATATTCCTAGCTTAGTATCAACT
chr01	65112196	chr01	43.59	TTAAAAAAAAAATTGTTAAATTTTATAGGTAAATAAATATTTGAAAATAAATTTTTATAATATATTCCAAAATTTATCATCAAATGCTAGAGAAATTTAAA
chr01	65112203	chr01	43.59	AAAAATTGTTAAATTTTATAGGTAAATAAATATTTGAAAATAAATTTTTATAATATATTCCAAAATTTATCATCAAATGCTAGAGAAATTTAAATTTTACT
chr01	65127157	chr01	43.59	TTAACTATGTATTGTTCTTTTTCGAATTAAATTCGTAAAACATTTGTTTGAATTTTTTTTTCTTTATACTTTTTCTTTAGATTTAATGATTATTTGTTTTA
chr01	65278368	chr01	43.59	CCCCAGGCGTTGTCGCACAAAAAGAGAAAAGAGAACTGAAGTCTCTTATGGTAGTCAAATTAGAATTACTTTGTCTGTATTGTTTTTGAATAACTCGGATT
chr01	65313186	chr01	43.59	TGTACATTAGTATATCCATTTATTGCTTCACTAGTAAAATGATAACATCACGGAATTTATAAAATAATACTTAAAACCTATCAGACATTAAAATAAAACAC
chr01	65363031	chr01	43.59	ACAATCTCGGCTCATATTTAAAAAAAAATATTTTTATGCAGATTCACAAACGTCTATAACATAAAGAAATTTTTTGCACACAAATTTTATGTCTTCCCACG
chr01	65546033	chr01	44.91	GTATCTCTAATGTACGTTCTTGAATGCATTTTGTTGTAGATAAAAAACTAGCATGGATGTAAACTTATGCTGCATGTTTCTTCTCCTTACCTTGGTGAATT
chr01	65708051	chr01	44.91	ATGAGAAGCTCATGATTTCTAATAAACTGATAATAACTAGTAGACACTTTATCTGAAAGCATCTTTAATCGTGAAAAACTGATAATCTGAAATATGCAGCC
chr01	65778338	chr01	44.91	CCCTCAGGTTAGCATTGGATCTCTAAATTCTTGTCAACTTGTTTGCATGCATGTTATATCTTGGCTTCTTTTGCATATCCAAGGTTATTTGATACTACTGT
chr01	65795287	chr01	44.91	GAATCTGGATTAATAGTTGGGACTCAAAGCAAAAGTATTCGAATACCTGACGGGCTGACATCAAATGAAAACTTAAATAAACGTATTTCAAATGAATTAAA
chr01	65805056	chr01	44.91	ACCTAATATGACTATTTTCTTGTTTTTAGAGATATATTTTCTCCCCCCCTCGGCTTTCCCCACTGATTCCAGACCCTTTAATTTATGGGCAGTTTGATAAA
chr01	65815890	chr01	44.91	TCTAACTAGGTTAATATTGTTTTATGTAATTCTCTAATAAAGTTAAACAACTTGTGCTTATTAATTTAAAAGGGGATCATCTAAGAGTCTTCCAATTTGAT
chr01	65815956	chr01	44.91	TAAAAGGGGATCATCTAAGAGTCTTCCAATTTGATTTCGTTATATAAGTTTCTCCTATAATTTAAGATATTCAGTTTATTTTTTATAGTGAATTCTTAATT
chr01	65989710	chr01	44.91	GCTTAAATGAAACGATATAGTCAGTAATACTTCATTTATTGAACCCAATTTACGTTTTGTCATACTCCTCCAACTTGAAGATGACTATTCATTTGGCCCTT
chr01	66011697	chr01	44.91	TTTATTTTAGAAATCGTTGTTTTTATTTTGCTATATTTTATGTACTTCTGGTAATCTTCATGCTTCTTTTGTTTAAATTATAATTGGCTTGTGTCTGTTTC
chr01	66032608	chr01	44.91	AGAATGTCAGTATGGTCAATCAACAAAGTTAAAGAAATGCACAAATGTGAGAATATACAAAACTATTAAAAGGATGTGTATGAAGGAAAGGTCAAAAAAGT
chr01	66089348	chr01	44.91	AGTATTTTTTTTTAGTAATGTGACATGAAATACCAGAAAGATCGATATAACTTTAAAGTTATACCCAACGTAGCTAGCTATAAAGTTGAATTATACACAAA
chr01	66104752	chr01	44.91	ACAAATAAGTAAACTTACAAAGCTATCTACAGTAATATCTTGGTCAAACATTATTATGTTAAATTCTCAAGAAGTGAAATATGATAAATATTTTGAGACAC
chr01	66147641	chr01	44.91	AAATACATGTATCCCCTGCTGAACCAAGCTAATGGAAACTGTCAAACCTCAAACTGTATCAAAGCACTGGCTATCAAAACCTTATAATTAAAAGAATTGTC
chr01	66149121	chr01	44.91	ATTGCTGTCCGACAATGATCAAATTGGAAGACTGAAATTAAAAAATGATATGGAAAAAAACAGTATCATAAAAGCACAGAGTCTAAAAGTGAAATATTGAT
chr01	66220878	chr01	44.91	CCATGATCATAAAATAAATAAAATACTAAATATAGTGTATTAAAATAAAAACAGTACTCCATAATATTAATGAAATATACCATACTACGTATAAGAATATA
chr01	66239329	chr01	44.91	TTAATTAAAAAACAAGTCTTATAGAATTTTTAGAGCATAGATACACACCAAAGAAAGGAGAGAAGAGGGAATATCAAGTAAAAATTGGTCCATCTTCCTTT
chr01	66239334	chr01	44.91	TAAAAAACAAGTCTTATAGAATTTTTAGAGCATAGATACACACCAAAGAAAGGAGAGAAGAGGGAATATCAAGTAAAAATTGGTCCATCTTCCTTTGGATA
chr01	66239345	chr01	44.91	TCTTATAGAATTTTTAGAGCATAGATACACACCAAAGAAAGGAGAGAAGAGGGAATATCAAGTAAAAATTGGTCCATCTTCCTTTGGATATTAATTCGGTC
chr01	66246155	chr01	44.91	ATAGTATTCATGTGACCAAAAAAATCGAAAAAAACCCATATATTAATTTGGTTTGATTTTGATAAAAATCCAAACCAAATCGTAGCATTTACACTCCTAAT
chr01	66310683	chr01	44.91	GTTGCATACCTCGACTGTAATCAAAGTTTGGCTCAACATTCGTAGTAAAACTCCAATAAGTATTCCGTCCATTCAAGCTCGAAAAAAATTTAGAAAGAGAA
chr01	66311949	chr01	44.91	TTCCTGAGTTGTTTCTCTATTGAGAAAAAGCCTCATGATATATTCACTTTAATAGAAGCTGCTCTCGAAGTTGGGGCATCAAAGGATCCCGCACAGTTCAA
chr01	66329007	chr01	44.91	CTATTACTTCTCTGCCTACAATCGCTCCACGAGGATTTAATAGTGAAATTCCTATTAGTGTTAAGGATCCAAATGACTCTGTCTCTTTTGTTATTATGCAA
chr01	66370390	chr01	44.91	TCATAACAACTTTAAAAGCAAGAATATAAAACAAGAAAAGAATAAACATTGGATCTACATCTAGAATGTTCTCAATTTCTAGCTTAAAGTACCAAATAAAA
chr01	66370443	chr01	44.91	TCTACATCTAGAATGTTCTCAATTTCTAGCTTAAAGTACCAAATAAAAGCAAAAAGAGAATGAAGTGTGGAACAAATTAACCAGCAAGAGTATATCTTAAT
chr01	66396819	chr01	44.91	CAAAGTTGATTTGCATGTGTTTACTATGTCTACTAGTAGTATTTTATTTTATTTTTGGGAGTTTAATACTAGCTAGTACTTCTTCCATTTCTATTTACTTG
chr01	66454471	chr01	44.91	GCCACTATAATAAATTTAATAATGCTACATAGTTATAGTTTGCATATTTACGGGTTGTAGGTACAGTTTAAGCTGTCACGTTTGCATATTTCATGAGTTTG
chr01	66475210	chr01	44.91	ACAATAAAAAGATGTTAAGAGAATTACAATTTATTTCTTACATGGTAATATTCTTGACCACGATATAGAAAATTTGAAGCTATTAAACCCTTGGGATTTCA
chr01	66475220	chr01	44.91	GATGTTAAGAGAATTACAATTTATTTCTTACATGGTAATATTCTTGACCACGATATAGAAAATTTGAAGCTATTAAACCCTTGGGATTTCATTAACTTTAT
chr01	66543332	chr01	44.91	ATCGCTACGTCACCGTTACTATGGTCAGCTATCCTTTCTACAAAATTAAATATCACATAAATCGTTAAAAAAAAAAAACATTTTCCATAAAAAATATATTT
chr01	66546776	chr01	44.91	TGATGCCACATAAATTGAGACAATAACTTACTGGTTTGATTGACTAGATTATCAGTTCCTGAACTGATATTGACAGTATTTGGTGGATTAGAAATATGAGC
chr01	66593969	chr01	44.91	AAGCTCAAGTAATGATAAATTTATTGATCTTTTCTTTTGTCATTTACCAAGAAAATTACCATTTCACATGTTACCATACTTAGTTCAAATGTGAATTATTT
chr01	66610339	chr01	44.91	AAAGAACATATTTACAATATATTAGTAAGAATAAAATAAATTAGGTATATTAATAATAAATAGGTTAAAAAATTATTACATAAAAATTTAAGTATTATGAA
chr01	66634549	chr01	44.91	TAAGCTCCAACATCAACGCTAAAGGCATGAGTTAGGTATATTATCAAAACGAGTAGCTAACATAATTATTAAAATAATTTTCAATTACGAGTTATCAATAA
chr01	64828941	chr01	45.92	ATAATTCTAAATAACAAATAGCAAATAGAGTACATATTTTGTTGCTATAGGAAAAATTGTATATAATAGCAAACTATTAATTCAAATTAAATGCTATAAAC
chr01	65012359	chr01	45.92	CATACAAGATGTGTGTGTTTATTAATTTGTTCAACTTTATATAAATTTAAGTGTCTACTTGTGCACACTCAAAATTGGAGGGCATAAATATGTAATTTAAG
chr01	65012366	chr01	45.92	GATGTGTGTGTTTATTAATTTGTTCAACTTTATATAAATTTAAGTGTCTACTTGTGCACACTCAAAATTGGAGGGCATAAATATGTAATTTAAGACCAAAT
chr01	65018140	chr01	45.92	TAGTTGATGTGATTATTAGCTTACCAATAGTTAAGTAACATTTCACATTTAAATGAATTTTTGGCACTTTTTTCATTGTTCAAAGTTTAAGATGGATATTT
chr01	65446195	chr01	46.43	TTCTATTTAATTGCTTAATATTCAATCAAACTAGTGCTTATCAATTTTTCGTAGTTTGGTACAAAATCAAAGGACAAAGTGGCAATAAGTTAATGGCTTGT
chr01	65446198	chr01	46.43	TATTTAATTGCTTAATATTCAATCAAACTAGTGCTTATCAATTTTTCGTAGTTTGGTACAAAATCAAAGGACAAAGTGGCAATAAGTTAATGGCTTGTACG
chr01	65446203	chr01	46.43	AATTGCTTAATATTCAATCAAACTAGTGCTTATCAATTTTTCGTAGTTTGGTACAAAATCAAAGGACAAAGTGGCAATAAGTTAATGGCTTGTACGAGTGG
chr01	65479727	chr01	47.7	TTACTCAGAGTTGATCTGGCAAAGCCCTGTATAAGCCCAGAATACTAGTGTGATGCAAGCTTTGTACAGGTTTAAACCACTGACTAGGGAGAAGGGAGGCA
chr01	65553466	chr01	47.7	AAAGAAATCAACATTTACTGTGCTTTATAGTATATAAAGGCTCACAATTACAGAAGATTTAAACTCATATATGATAATTTAAATCAACTGTACCAGTTGAT
chr01	65727835	chr01	47.7	AAATTGAAATCATTAAGCATGACCTCAAATTCATCAATATCATTTACACAGATAAATTTATTTTAATTCCTTGACACTTCATTTCCAAATTAAAACACTCT
chr01	65753469	chr01	47.7	ACTATTATGTTCTTAATTCGTTTTATATCTAGTGTTCCTTGAGTTGATTCTCTATTGAAAACAATATTTCTAAATTAATTTCTAAGATAGTGATAAAATCT
chr01	65753477	chr01	47.7	GTTCTTAATTCGTTTTATATCTAGTGTTCCTTGAGTTGATTCTCTATTGAAAACAATATTTCTAAATTAATTTCTAAGATAGTGATAAAATCTGCATACAC
chr01	65769798	chr01	47.7	AAAAATACAAGTACAATATAAACATTTATAATTTTTATCAAATTTAACTTAAATGATAAAGCTATGTAACTATAATTCATAAAATTACAATATATCAAAAT
chr01	65769805	chr01	47.7	CAAGTACAATATAAACATTTATAATTTTTATCAAATTTAACTTAAATGATAAAGCTATGTAACTATAATTCATAAAATTACAATATATCAAAATAAATATA
chr01	65431713	chr01	48.04	CACCCCTAAATTCTCATCAAGTTTAAGAGTATTTTCAAAACTTCTCTCAACTTTTTATTAAGAACTTCATGCTCCTACAAGAGTTTAACTGTTTGAGACCA
chr01	65504542	chr01	48.04	TCGATCACCAGAATCAAGTTTTCTTCCACCAGAAAAATAATTAAGTTTTAAAAGATTAAGAGAGATACTTTTTCAAACAAAGACTAGGAGAGTTAATAGTA
chr01	65504558	chr01	48.04	AGTTTTCTTCCACCAGAAAAATAATTAAGTTTTAAAAGATTAAGAGAGATACTTTTTCAAACAAAGACTAGGAGAGTTAATAGTAGAAAAACATGAACTGT
chr01	65708053	chr01	48.04	GAGAAGCTCATGATTTCTAATAAACTGATAATAACTAGTAGACACTTTATCTGAAAGCATCTTTAATCGTGAAAAACTGATAATCTGAAATATGCAGCCTA
chr01	65726114	chr01	48.04	CTTTTTTAAACTTTTCTTTTTTCAAATGTCAAGTTTTTTTATTTATCAATCTCTTTTTATGTCCAAACGCCTACCAGTCTCCTGATCCAAGTAAGCATTAC
chr01	65726116	chr01	48.04	TTTTTAAACTTTTCTTTTTTCAAATGTCAAGTTTTTTTATTTATCAATCTCTTTTTATGTCCAAACGCCTACCAGTCTCCTGATCCAAGTAAGCATTACCA
chr01	66773124	chr01	50.89	TATACTAAAAATGGAAAGCCACAAAATTAAAAATTAAAATACCATTTTACCTTTATCATAATTAAAAATGTTATAAATATCTAATAAATTAAATATTAAGT
chr01	66809785	chr01	50.89	ATTTTGCAATACAAAATTTATATGAAATATTTTGGGATAAACGTGCAACGCACGTTCCCATATCTAGTATTATACTAAAAATGGAAAGCCACAAAACTAAA
chr01	66979784	chr01	50.89	TGACTTCTGCAAGGTCTCGAGACAAAAAGTCAACTCTAGTAATCTAGGGTCCTTTTTTCCCAAAATAGTTCCACTAGCAACTCTAATACTTGCTCTTCCTT
chr01	67020773	chr01	50.89	TTTATGACCACAATATTCAAAAGTCTTCTTTATTTTCTAAACTCCGTGTCAAGTCAAACTAGGTCATTTTTTGTGAAACGGATTATAATTAAATCATCACC
chr01	67019755	chr01	53.37	AGCCGACACTGGTCTTTACTTTTACTTTTCTCTTTCCGTGCAAACGAATATAATGCAGTTAAACCAACCGTCAATAATATATTCAATATAATTAATCACGC
chr01	67170414	chr01	53.37	ATACCGTATATGTTCAAGTCTAGTTTATAATTTATATTACTCTTAATAAAAATAAACGACCCTATCTCTTTTAAGTTGAAAAAATTCATTATTTTGTGGTG
chr01	67170420	chr01	53.37	TATATGTTCAAGTCTAGTTTATAATTTATATTACTCTTAATAAAAATAAACGACCCTATCTCTTTTAAGTTGAAAAAATTCATTATTTTGTGGTGTATAAA
chr01	67590408	chr01	54.67	ATCTTGATTTTTAATAATGGTAGCACTTCCACTCAGGTGATGAAATGAGCTAATTAAATGCTGTGAAAATGGATAAAATATTTCCGCTTTTAAATCATAGA
chr01	67594552	chr01	54.67	GATGTGACAGACAAAAGTTGTATGAGGCTCTTCTTAGAATTTGTCAAGTGGATTATTGGATCCCATTTTCAGAAAAATGGGCCAAATCCGTTTCTCTCTCT
chr01	67594649	chr01	54.67	CTCTTCCTTCTTAACTTTTTCTCTTTTATTCAAATCTTCAATTTTTCAACATTTCTTTTTCTTCTTTGTTTTTCCTTTTTTTAAAAAATAATTTTATTTAT
chr01	67603154	chr01	54.67	TTTTTGCGACGTATGGTTTTCTGGTCTTGCCTAATAGTAGAATAAGAACATGAAAAAGAAAGTAAACAAAAAAGAAACAAATGACTATAAAATGTTGATAC
chr01	67611985	chr01	54.67	TGTATGATTGTCACTGATCATGATCCTCTTTTGGATTCTTTTCCTTCTGTGATTAGGCGACGTTGTCTCTTCGCGAAGCTTACCTCTGGAAATGGATGCAT
chr01	67614561	chr01	54.67	TCAGCATGCATCACATATGAAGATAACTGTTTGTGTACTGTCATCTTGGCTTTGTTGCAATGAACAAGTTGTCTGCAATTTTGCTATAAAAATATGGTTTT
chr01	67614588	chr01	54.67	TGTTTGTGTACTGTCATCTTGGCTTTGTTGCAATGAACAAGTTGTCTGCAATTTTGCTATAAAAATATGGTTTTAGGCCTTCCATGTTCTGTTCCATTCTT
chr01	67626928	chr01	54.67	AAAAAGACAAGCTGTTTATAGTGTTTAAGTTATCCCTTGCTGTGCTAACCTATTTCTTTTAGTACAATTGGTCATGATTATAACAAGAAAGTCTCGATTTT
chr01	67642238	chr01	54.67	GTATTATTTTTTCCCCCTTCTATTTTGGTGTTTCTTAATTAATTTATTTATTTTGGTTTTTCATTCGGGGTTCGAAGCCTTCATTGGAGCCCTGAATCCGA
chr01	67649248	chr01	54.67	ACATCGAGTGTTGTTAAGTTTTTCGAGATAATAATAAAAAAAAGTTGTCCCGAAAGATAATTGTCAAGGTAGGGAATAATTACAGATGATCTCATCTGAAA
chr01	67567311	chr01	55.5	AAATGGATGTTCATCTATTTATATACTAACTTAGGGGTTACAATATAAATAATAATTATTATGTCAGTCCTTATATATCTACAAAGTAATCATTATTCTAG
chr01	67579132	chr01	55.5	TAAATAACATAAGTTAATTGAGTATTCACACAATTTTCTCTACTGCAATTGTTGAAGGTACACTAAAAAAATCCCTTAAAGATCTATACTACCATCTCTTG
chr01	67579144	chr01	55.5	GTTAATTGAGTATTCACACAATTTTCTCTACTGCAATTGTTGAAGGTACACTAAAAAAATCCCTTAAAGATCTATACTACCATCTCTTGAAGACAAAATTC
chr01	70317256	chr01	58.57	GGAAATTGCCACCTAAGTTTATGTGATTAAATCAAGGTAAGAGAACCACTTGGTGGTGGTGAAATCAGAAATTTCATTAAGAATATTTAAAATTTAATTTA
chr01	70318043	chr01	58.57	GTTTTAAGTATCCATTAATTCTTTATTTGGTTACAAAGTGTGAGATAACTCATCGCATGATAAATAATTATGACAGGGATAAGTTATTGTGGGTGGAATAC
chr01	70318050	chr01	58.57	GTATCCATTAATTCTTTATTTGGTTACAAAGTGTGAGATAACTCATCGCATGATAAATAATTATGACAGGGATAAGTTATTGTGGGTGGAATACTAATCTC
chr01	70331177	chr01	58.57	TCTACCCGATCCATCTAACCCTCTACTCATAATTTTTATTTTTTTTTATATTTACATTTTTCTCCTTTTAATTAAGATAATACGTGGAGTGGAAAAAAATA
chr01	70340107	chr01	58.57	AATAATAATTTAAGAGGCAATTGAAACTATAGCATCTAAAAAAAGAATTTTGACAATGAAACTTTCTTACCTTATACTCACTGATATCATCTCTCACAGAA
chr01	70340117	chr01	58.57	TAAGAGGCAATTGAAACTATAGCATCTAAAAAAAGAATTTTGACAATGAAACTTTCTTACCTTATACTCACTGATATCATCTCTCACAGAACTAAGAAGTT
chr01	70341377	chr01	58.57	AAGCTTAGGTGGGTAATCAGTAGTGTTGACCCTTAGGTCTTCATGAACAAAGACAACCAACTAACAAATATCTACTGAAGTTTACTCCTGGTCTGTAACAT
chr01	70341761	chr01	58.57	GTTGAGGGAATTCTGTATTGAAATGAAGGAACTATGGAAAAAGTCAAAAACGTAAGTTGGCAATGCAAAATGGACAATCAATGATGCACCAAGAGTGTAAC
chr01	70384619	chr01	58.57	CCAGAGGCAGGGGGAGAATAAAGTTTGCAAGCTTCTCAAGTCCTTATATGAACTTAAACAAGTTTCTAGGCAATGAAACCTCAAACTAACTGAGGCTCTAA
chr01	70384623	chr01	58.57	AGGCAGGGGGAGAATAAAGTTTGCAAGCTTCTCAAGTCCTTATATGAACTTAAACAAGTTTCTAGGCAATGAAACCTCAAACTAACTGAGGCTCTAATGGA
chr01	70389902	chr01	58.57	AACTATTCATATTAAATGATGTTTAATTTTAAATCTTGAAATTAATTTAAGAAAAAGGTAAAACCTAGAAAAAATGCATTTCTTTTGAAATGATAAAAGTT
chr01	69022721	chr01	60.26	TTTTCATCCATTAATTAATTAAAGTATGTGACCATTTCATCTAAAAACTTAAGTTATTTTAAAAAAATATTTTTATTATTTAATTATATTCTCGACTTAAT
chr01	69030339	chr01	60.26	ACCTAATTATATTGAAAGTTAGAAATTGAAAACTTATGTTTAACTATATAAATCATATACCTAATTAAGTCACAACTCCTATTAGGGTGTTTGGCTTAATC
chr01	69046216	chr01	60.26	GAGAGATCTTCTTCTAGCCTAAGATAGCATCCCTTTCAAATATTAGACCAATCGGTTTCTTATAATTATTAAATATTAGACTATCAATAAAGAAGCTATTG
chr01	69046241	chr01	60.26	AGCATCCCTTTCAAATATTAGACCAATCGGTTTCTTATAATTATTAAATATTAGACTATCAATAAAGAAGCTATTGAATTAAAATTGATGTAATAAGTAAG
chr01	69068392	chr01	60.26	ATTGTTATCCCTGATTACTATATCACCCAAGGTGAGGGATAATTTATCCCGATACTAATTATTAATTTCGGGATAAGTTATCCAAGACTTGCCAACCAAAC
chr01	72753880	chr01	67.12	AATTCAAAACAGATTCTCATATACGACACGAACAATACTTCAAAGGAGCCGGGCTTAAAGCTAACTTTTTTATAAAGTGAATTCACTTTAACGTCACACTT
chr01	72778209	chr01	67.12	ACTTTTTCCTATTATAAAAAATATGGTTGTACTGAAAATTTAAAAGTGTAAGCCGTACATAGCAAAATGAAAAATATCCAATCTTGTTAATTTTGAACAAA
chr01	72778243	chr01	67.12	AAAATTTAAAAGTGTAAGCCGTACATAGCAAAATGAAAAATATCCAATCTTGTTAATTTTGAACAAAAGCAAAATTTAATTACTCAAACACTCTAATAAAG
chr01	72781743	chr01	67.12	ATCGAAATCTTTGATGTTTTCCTTATCTAAAACTTTAATTGAAATGGGCGAATTTATTAACTGGACAAACAAATATTTTGAAAGATTTAAACAAATACAAG
chr01	72864255	chr01	67.12	TTCGTCTTTGCTTCCAACTTTATAATTATAAATTTAATCGTGAAAATAAAGTATATGAAGAACTTCTAGAAAAGAGTAAAAAAATAAAATTGTAGCATTGC
chr01	72867639	chr01	67.12	GAAAATCAAAGTACGTGGTTGAATGGTAAGCTTCTACTTTTTCATTCTTAGTTATATAGAATTTAGATTTAGGACAAGTATGAAATCACTTTCAATAGAGA
chr01	72944518	chr01	67.12	CTTCATAATGGAGGGGTAATGGAAATAATTAGTCATAGTAACTTCTTGGTGTAGTGGACATCCATACCATAATATTTTATAACACATATTTGGTTGATGGA
chr01	72962427	chr01	67.12	AACAATGAAGAACTGGCAAATTCATTGAAAATTGCTTGCTTGAAAAAAAAATTTAGACTGGAAAAGGTGATCAATTCTCGTAATGTGTTTTCTTTTAAATG
chr01	72968445	chr01	67.12	CATGAGGAGGGTTATAAAGATCTGAAATATTTTTGGCAGTTTTTGTTTTTGATATCAACCATCTCAATATACTTGGAGATGAGATCTCTTCTTCTGCATTT
chr01	72982850	chr01	67.12	AATACAAAATCAATGCCCACTTTTTTGAGCTCTAGTCCAACACCCTCTTTGACAAACTAATCAACATTCAAGAGTCTTCTTCATCGCGTCAAGTTACAGCA
chr01	73021113	chr01	67.12	AAAAAGTAATGATATGAATTATTACTTTTAATAACATATGAAATAAATTGTTAGTAGATATAAATGTGGGGTTATTTTTACAAAATATAAACTTGTCGGTT
chr01	73022734	chr01	67.12	ATTTTGGTATATTTAACATAACTAGGACCACAAAATTGAATAGTTTTTTTTATTTTATTAAATTTCGTGTCAAATCAAATTAGATCATTTTTTTTTTAAAC
chr01	73026373	chr01	67.12	TTTTGACATAATGTATGGGCCAATCTGAAATCTTAGAATAATCTTCTGTTGAGCTGTCTGCATTTTTTCTAAAGATTGGTCTGTAAGCTAAGAATTTTCTT
chr01	73042394	chr01	67.12	ACCAAACGACCCTTAACACCGTTTGGAGGGTTGTTACGGATTGTTTCATAATGTATCATATTGTATTGTATTATTTTAAGGAACACAAAATTTGAATAGGT
chr01	73042798	chr01	67.12	TATACAATACAATACAATGTTTAATGTTTGTATTCAGTTTATATTGTGCAAGCCCTATAAGAGTTGGGTGAGTTGAACATTTGTTCATTGCTTATTCCACA
chr01	73087984	chr01	67.12	GGCAAAATTTCAAAGTAAATGTTCACCAATAACAATAATGTTTTTGCTTTAACCTCGTTATAAGATAATATACTTTTCTTTTAAGCAATAAAATGAAGTTC
chr01	73095657	chr01	67.12	GTTTACCCTAGCTATTTGTATACGGTTTATGAAAAATTCATAATTAATTACCCTGTTTGTATATTGACAAGCGAAATATACAAACGAAGTTCTGAAATTTT
chr01	73247455	chr01	67.12	TATAATCCTAAACCATTATGAACTGAAATGATTTTATGCACGAAACAGTTAGTTCAATGCATAGAAAATATTATCTAGGAGTGTCAATTATCTAACTCTTG
chr01	73335848	chr01	67.12	CAAGTCACTAAGAAAGTTATAAACTAATAAGAAAATGGAATACCAATTAATAGGTGACACTAACGAGTATAAATCTATTTGTTATATGAGGGATTGCGTGC
chr01	71990731	chr01	67.22	ATCCGCTGATAGAAACCTTAAAGAAAAATAAATAAACCATAATCAAGTGTCCCCAAATTTACTATAGCAAAATACTTATAGGATAAAGAAGCATTCCAATA
chr01	71990757	chr01	67.22	AATAAATAAACCATAATCAAGTGTCCCCAAATTTACTATAGCAAAATACTTATAGGATAAAGAAGCATTCCAATAGACGCTAAATTTAATTACTGTATAAA
chr01	71990759	chr01	67.22	TAAATAAACCATAATCAAGTGTCCCCAAATTTACTATAGCAAAATACTTATAGGATAAAGAAGCATTCCAATAGACGCTAAATTTAATTACTGTATAAAGT
chr01	72084754	chr01	67.22	AGTCAATGAGGTCCACCAATGCAAAAAAATATCTCTGATTTCCCCTCAAAACATCGGTAATTTCTGCTTAACCTATTGTCGGCAGTATGCAAAAGAGGAAC
chr01	72767828	chr01	67.88	GTTTGTTGGATATTATGGAAGGAAAGAAATGCAAGATGTTTTGAAAGAAACGCAAATTCTGTACGGAAGATTAAGGTTAGATGCTTATGACTTTTGGCTTT
chr01	73037922	chr01	67.88	AAATTTATAATATCGTGGTTTTGGTATTATAGTATTTAATATGGTATATAGTATACATTTTAATTATTATTTTTGTATTCGATACGTTATTTGGTATTTGG
chr01	73226668	chr01	67.88	TGCTTAATTGAGAAATAATTAACATATCCTCCATTTCTCTTGGATTAGAGGCCTTGTTAAACAAAATCATAACAAACATAGAAAGTCAACTTCAATTAAAA
chr01	73226863	chr01	67.88	CTTCTATAAAATGTTCAAATTAATGTTTAATAGTGTCCTCATCAAGTATTGCTTAGTCATTTGACATTTTTACACAAGATATTACTTTTTAAACGTAGTTC
chr01	75030104	chr01	67.95	GTTTCTAAATCTATTGTAATTTGAAGGGTTTATATATATAATATATAAGGGAAAAAATTGTGAAAATGTTTATCTTATCTATGAGAAGAAATATATATAGA
chr01	75048157	chr01	67.95	GATTTCATGCTAATACTTGGTGGCACATAATTAGAACACAGATACCAGCAGTTTCCATGTTAGTTGAAGACAAAAAGTTAAAACACCCAGGTGAAATCATC
chr01	75048177	chr01	67.95	TGGCACATAATTAGAACACAGATACCAGCAGTTTCCATGTTAGTTGAAGACAAAAAGTTAAAACACCCAGGTGAAATCATCCAACAATAAAAGAAAAAAGA
chr01	74039937	chr01	68.04	AGAACTTGAGACTTAATTAAAGAAATTCAAAAAATGAGTTAAAAGTATCTGTTAAATCTTGAAATTAAAAAATAACGATTATGATTTAGTTAAGTAAGATC
chr01	74046395	chr01	68.04	TGAGTTATGACACAAAAATTCTTGTTTCGAACTCAATTATGTTTTGTGAGATTTGTTGTTTTTGTAAGCTCAAGCTATATTTTTTGGGTGTGTGCGGTAAG
chr01	74062505	chr01	68.04	GATACTGAAACTTTTACTTCTCAAGTGTCATGCTAAACCTATTGATTGTTGCTCAAATTTGGAATTTAAATTTGCATTATTATATCTCAGTTTAGACTTTA
chr01	74149882	chr01	68.04	CCTTTATTGTATATACATCAGCATCAACTGAAACATGTTTGAGATTTTACAGTTTATTGAGGCTAATGTGTATAATTAAAAGAAATAACATATTTAAATGG
chr01	74151464	chr01	68.04	ATTTTTCTTCTTTTTCCATGAAAAGTATCAAGGGGTGAGCTGAACTTGGGTATGAACACATGTTGGACCACTAGTCTATTCGAAGTATATGTATTGATGAT
chr01	74612085	chr01	68.04	TCTGGGTTTCTCTTAGAACATCTTGAATGTGTCAGTGTTACTCTGTAAATTTAATTTAATTGGGTTTAAGCAAAAAAAAAAAAAATATACCTGGTTACGCC
chr01	75267645	chr01	68.3	ATACTCAGTAGTCCAACAAATGTGCAGTATGGACTTCTTGAATGAAGAAAATAGAGACCATTAATCTTTCCTTGATAACTAGAAAACCTATCTTTGTATGT
chr01	75429274	chr01	68.3	ACAATGTTAAAGATATTAGTTTGACACAAGTACCTTTATGTTTGCCTTGACAATGCTTTATCAGATATTTTTGTTAGATATTTTGTTGAGTTAATTTTTTA
chr01	75498982	chr01	68.3	ATGATTTGGACAATATTTTTTGATTGCTAAATTGGATGTCTCTTTAATTATAAAATCAAACTATATCTCCAATAATTAATTAATACTCTATTATCACAAAG
chr01	75531267	chr01	68.3	AAAATCACTGGCAATATCAAATTGCTCTGTTATTTTGTTGATTCCAATTTTGGTTTGAAGTTTAAGTAGTTAAGTTGCTTCCATGTGAATTAAATATGATG
chr01	75731701	chr01	68.3	TTTTTGAGTTTAAAAAGAAAACCAAATGATCAAAATCCAATACTTATCAAGAAAAAGACCAAATCTTTGAGTTTAAAATAACCCAGATGATCAAAATCCAA
chr01	75754888	chr01	68.3	TTATTGTCTATTAATAGTTTTATGCCCAAAATCATTAGTTGTTAGCACACCCCACTTTCAATTCGAACTTTGTGAGTTTGAACTAGTGGTAAGTTCAAGTC
chr01	75796139	chr01	68.3	ACACTATTATAAAAAAAATTATTCTTACCAAAGGTGTTTCATAATCTTTTATTGAAAGCATTAAATATTTGAGGGGTAAAACTTTCATTTGTGCACACTTA
chr01	75862263	chr01	68.3	TTAAAATTTTGAAAATAATTAAATTATGTTACTTGTTTCAAAATTTAAAAATGATATGATAATACAGACATACGTGGATTTAGGATTTAAGAATTACGAAT
chr01	75894831	chr01	68.3	ATCATTAAACAGATATCAAATGTATATTTTAAACTAAAATGACATATAGAAGCTATGAGTCACTTTTGAAAAATAAAATAAAATAAAATGACTAATCAATT
chr01	75925414	chr01	68.3	ATTGTTACTCTTCTCAGACAAAGAGACAAAAGGTTTTGTAGATTGTTACTATTTGAACCTCTGTGTTTGTGTACACTACTTCATGATGGGAACTGAAGATA
chr01	75928137	chr01	68.3	ACTGACTCTGTTCATTTTTACTTGTCTACATAACTATAATATTTTGAGATGTCTAACTATATATTTTTTATTTACAAAATTAATGAATATTTTATTATTTT
chr01	76030512	chr01	68.3	TAAATGGGTGACTAGTTATTATAAGAAGATTTAATCCCTAATTTATCTATCAAAAAACTAGAGGAATAGATGATCTTTCACTATTAGATGTGATCATTGTG
chr01	74764704	chr01	68.64	GTTTGTGTTGTTTTAACTTTACACGGAATTCAAGAAAGTAAGTAACACTTAATAGATTTTGTGGTTTTAAACTAAAGATATATATAATGTATCTGAATGCG
chr01	74764826	chr01	68.64	TATGTTACGGGGAAAGTTGAAATTGAAGAGTTGCCAAAAAGGTAAAAGAGTCATTCTTTTTTACCTGGGTTAAAAAAAGAAAGTAAGACAAACAAATTGAA
chr01	74781692	chr01	68.64	ATATCTTTAGTTTTTTTGACGAAGAAAAAAAAACCACAAGATTCAAAAGTTTTCTTTTCTTCCTTCACTCTGTGCCAACTCAAAACCAGACAAACAAATAG
chr01	74537956	chr01	68.66	GAATTTCTAAAAACCCTAAAATTTATAGTTCGCAATTTGCAGGATTCAGATTAAACTTGGAGTGTCCAGCATATTAGTAGATTATGGGTCGTTTCAAGAAT
chr01	74537970	chr01	68.66	CCTAAAATTTATAGTTCGCAATTTGCAGGATTCAGATTAAACTTGGAGTGTCCAGCATATTAGTAGATTATGGGTCGTTTCAAGAATGTAAGTAGTTCTGC
chr01	74537973	chr01	68.66	AAAATTTATAGTTCGCAATTTGCAGGATTCAGATTAAACTTGGAGTGTCCAGCATATTAGTAGATTATGGGTCGTTTCAAGAATGTAAGTAGTTCTGCTTT
chr01	74537974	chr01	68.66	AAATTTATAGTTCGCAATTTGCAGGATTCAGATTAAACTTGGAGTGTCCAGCATATTAGTAGATTATGGGTCGTTTCAAGAATGTAAGTAGTTCTGCTTTG
chr01	76477681	chr01	68.78	AAGTAACACCATAGTCACGAAAAGACATTTTTGTTTATATATGTCTAGCTGCCTTAAAACGACTCTAGGATAACAGCTTAATCTAAGGGGAATTGTGTTAT
chr01	76501890	chr01	68.78	TTAAATGAGAGGAAATTAAAGAAAACTCAACGTTGCTTTTTGAAGTAATTCAAAGTAGGACCTAATTAGTCCTTAATCCATGTGATAAAAGGGTCCTACAA
chr01	76515446	chr01	68.78	ATATTTTCTTATCATGTTATAGAAAGAATACTTTTTTACATACTAAAAAATTTATGTTTTCTTATCATCTTGTAGAAAGTGTCAAAATTATACTTCCTTAT
chr01	76596223	chr01	68.78	TTGATGTAGATAAACTGACCATCATAGAACTAGAACCATCAGGAAGAGACAGTTGTGCTTCACCGGTGACAAATGGATGCTACATGCAAAGATAAGAATTA
chr01	76795614	chr01	68.78	TTCTTTTCTAGACGCAAAAATATTCTCAAATAAAGAAAAAGATTTAAAAAATAATAATACTCTACTTGTTTGATATTGTAAAAAAATAAATTACGTAACTT
chr01	76941341	chr01	68.78	TCTTTTTCCCGACTTATATCAGTTAAAAAAGATAACATTTGGTAGATGCAGACCTGTATGTGAGTCTTAATAATTGCCTTCCCGATCAGAGTTGCTGTAAA
chr01	76946512	chr01	68.78	AAAGTGATGATTCCTCTATCACACTAACTTTTCAACTTACTTTAATAGTTCCTTCTTTTGTCATTAACAAAATATATAAGTCAAATTAACATCTTAAACTT
chr01	74881444	chr01	69.59	AAGAATATAATTAAGTGAACAAAATTAAAATGAGATTTTTTATATTTATGGTTTAGTTACATATTATGAAAACTCTTGGAATAAGGACAATAATACATTAA
chr01	74889002	chr01	69.59	GGATAAAAGGGTGTTCGTATTAAACGAATAAATACATGATATGTGTTTTTGTCAAACGTTTATCACTTCATGATTAATTAATGTGTACTTAGATAATACTA
chr01	74912639	chr01	69.59	CAAAGGTACTTTTTTTTTTAAAAAAATAGTCAAACATAATCTACTTATCAAAATCATTTTTCAAATTAATTAGTCAAACACAAATAAATTTTTTTCAAAAA
chr01	74913896	chr01	69.59	TCGTGAAACTGTTTTTCTCTATTTTGATTCTCCTCTTTTTCCGAGATCTTAGATGATCTTGTTCTCTTAGAGGTATCAATTTGATATATAGTATTTTTGCT
chr01	74923857	chr01	69.59	TGTTGTTGTTGTGAAAACTTTCTTACGCTATTTGTTATTGTTGTTAAAAATTTTTTTAATTCTTGACGTACGTATCTGAATATTTGAGATGGGAGATATTA
chr01	74951294	chr01	69.59	CTATCCAATTTTTTTTAAAAGATGACCTTTAGCTTCAAGCTAGAAGTTTGTATTTTTTCTCATTCAGTTGTTGTAAAATGAAATTATTAGATTTGCAAATA
chr01	75118327	chr01	69.69	ATCATGCAAATGAATACTTGGTTGGAAAGGTAACTCCAGACAATTGGTTTTGCGTGAATCATGAACATCACAAGATGCATTTTTATTAGCAGAAACATCCA
chr01	75118328	chr01	69.69	TCATGCAAATGAATACTTGGTTGGAAAGGTAACTCCAGACAATTGGTTTTGCGTGAATCATGAACATCACAAGATGCATTTTTATTAGCAGAAACATCCAT
chr01	75118330	chr01	69.69	ATGCAAATGAATACTTGGTTGGAAAGGTAACTCCAGACAATTGGTTTTGCGTGAATCATGAACATCACAAGATGCATTTTTATTAGCAGAAACATCCATTA
chr01	73650543	chr01	69.73	TAATAAAACAATAATAATTGTAACTAGTACTTACTTAATATAATCCTCTCCCATGGTATCAATAATATGTTCATGTTGAGGATAATTTATTTATTTTTGTA
chr01	73714873	chr01	69.73	ATTGCGGGAGTAAAAATACTCCCATTCCATAATGTACACGCATCAAATCGGACCATAAAACTTCAGATGAAAATATGAAACTCTAAATTAAGAATATTATT
chr01	73722462	chr01	69.73	AAGGAGCCTGCAGAGACCAGATTTATGTCCACATGAAACAAAGAGTTACCTTTTAATTCATGAATCAAGGCTCAAGAAGTCTTGAAGCATATAAGAGTTGA
chr01	73724424	chr01	69.73	TCCCTTGTTTCGTCTTACTTTCTTAAACTCCGTACCAAGTCAAAACCAAACAAACAAATTGAAAACGGAGGGAGTACTAGATTAAATATTCTCAAACACAT
chr01	73794051	chr01	71.03	CATATATACAGTTATACACTATTTATGCAAATATCAATATATTACATAACGTGCGTTATTTTAGTTTGATTGTTTTTGTTAGTTTACATTATATATACATA
chr01	73794064	chr01	71.03	ATACACTATTTATGCAAATATCAATATATTACATAACGTGCGTTATTTTAGTTTGATTGTTTTTGTTAGTTTACATTATATATACATAATTATACACTATT
chr01	73918532	chr01	71.03	TAATTATAAAGAATAATAGTATGAAATTGGTATACGATTATTAAACAATCCCATCTACCACTATACTTTATTAATATTGAGAAGAAATCTTCCATCACAAT
chr01	73924077	chr01	71.03	AAAAAAATTGACTAACATTTTATGATGTATTTTTTCATCATATTGATATGCAAGAAATTTCAATTTAGAGTAGTTTTGTATAGTTTTTGAATATTTAATTT
chr01	73956296	chr01	71.03	GGTAAAGTATAGAAGGGGTGGGTTTTCAATTTTTTTGGATAAATAAATAAATAAAATCAGGTAAGTTATTTAGATGATGTCATGTGTCAATCTGTTAGTCT
chr01	74165880	chr01	71.03	TAAAGTTAAATTGTTTGTAGTTATAATAAGGTGATATTCTTTTTTAGATAAACTAGAAAGGAAAGGATGTCACATAGGGATGGAGGGAGTATAACATTAAA
chr01	74165885	chr01	71.03	TTAAATTGTTTGTAGTTATAATAAGGTGATATTCTTTTTTAGATAAACTAGAAAGGAAAGGATGTCACATAGGGATGGAGGGAGTATAACATTAAATAGCT
chr01	74399990	chr01	71.03	TCTTTATTTTGTAAAATCTTCCAGTACTTCTTGTACTTCCTATACTTAAATTGTGTAAAAAGCTTTCATTGTTTTGTGTACTTTCTATGCTCAAAATTTCA
chr01	74404384	chr01	71.03	TGTTTGAGAGACTTTCCAATGTTATGGATGAGAAATTAGAAGGCTCAGGGATTACCTTCACAGTCAGTTGACTGTACAAATCAAGGCGTGTTTGGTACGTG
chr01	75500012	chr01	71.29	AATTGAAGTAGGTGTAAACATTTATGGACAAAAAATAGTTTAGGTTTTTACATACCATTTAAGAAAACAATTTTTTGACTGAATTGCTCTTATTTACCCTC
chr01	75531270	chr01	71.29	ATCACTGGCAATATCAAATTGCTCTGTTATTTTGTTGATTCCAATTTTGGTTTGAAGTTTAAGTAGTTAAGTTGCTTCCATGTGAATTAAATATGATGTTG
chr01	75616363	chr01	71.29	TTTCATGTTCCTCTATTTTGCAATTTTCTCAAACTTATTGTTGCACCCAGAATTTTTTTGTTTATTTATCCGATTCTCTCTTTTATATTCATCTACTAGTT
chr01	79452833	chr01	73.47	AAGTTTATATAGGTATAAAATGCTTCAAGTATAAATTTATTCGCAATATAACATTTGTTTTGAGAGAACAACAACACGATGGTCACTACAATCCCATAAAA
chr01	79452875	chr01	73.47	GCAATATAACATTTGTTTTGAGAGAACAACAACACGATGGTCACTACAATCCCATAAAATGTAGTTTGGAAATGATAGACGGTATGCAAACTTTATAGAGG
chr01	79452888	chr01	73.47	TGTTTTGAGAGAACAACAACACGATGGTCACTACAATCCCATAAAATGTAGTTTGGAAATGATAGACGGTATGCAAACTTTATAGAGGTAGAGAGACTTTC
chr01	77194441	chr01	73.56	ATATGGTTGAGAGATAAACTTGAAATCACGCAGGCCACCATTTTCCTTTTTGCCAACATAAATACCTCCATATATATAAGAAGATCAATGATATTAGAGAT
chr01	77246316	chr01	73.56	TTTGGGATGGGCATTGACAAGTTGAACGTGCGAAGGATCATCCACTATGGTTGGCCCCAGGTGCAATTACTCAGCTAGATGTCCTTAATATATTTTATTTA
chr01	77285554	chr01	73.56	ATAAGTTAATAGATATTTCTGTGATTATAAATCATCTAATTAAGAATAAAAGATAAATTTAAAATAAAGTTTTTCCAATGATGAATTCACGAAATAGGTAA
chr01	77327777	chr01	73.56	GCTTATATTTATTAGCATCTGGCGTGATTTAAATAATTATTAAATAGGAATTATTATCATTTTAATTGTCATTAAAAATAATTAATATTTCATAATTAAAA
chr01	77532875	chr01	73.56	CTTCTCTCTCCCGAATATCACCAGGAAGATTTCCGACGTAGATAGTCCGACTTAGACGACCCATATTGCCTGAAATCAATACCCAAAAAAATAAGCAGCTT
chr01	77641765	chr01	73.56	AGATAACTTTACTATATCATTTCTATTAATTATTCTTCTGTTTACTTTTATTTGTCACATATTGATTTGGTATACCCATTAAGAAAAAAATTATTGAAATA
chr01	77690104	chr01	73.56	GTACTGGTCATCTAGTATACCATCAAGTCATTTTCATGTCACAACATTTTAGCTTGATCATGAAAATTAAAATGATTATTTTAATCTTGTGGCTGTAATTG
chr01	77703963	chr01	73.56	AGACACATATTCTATGGAGCCTTTTTATCGGTGGGAGGGTTTGATGATCCCAAATTGACTTGGCCTTTGGCAAAAGGCCTCTTCTCTATCGGATTTTAGAA
chr01	77986821	chr01	73.56	AATGCTGTCTGGCCTAGTTTTGATCATTCCATAAGTTTTAGAAACTTTTTTCCTTACACATTTTACTAGTAGATATCTGATCGTTCTTTTGGTTATTTCTT
chr01	78016541	chr01	73.56	TTTAGTATCTAGTTAGTAATTAGTAATTCTTGATGTAGTTATCTTTGAATTTAATAAGGAAAAATTACTGAAATGCACGTCTTATGTTTTTCTTATTTCTA
chr01	75774073	chr01	73.64	TTTATTTTTTATTTATCATCCCGTATTTATATTAGAGCCCGTTCCAATTCGCACTGCTTAGAACCCAGGAAGCACTCCTGCTATGGATTTTCTACTTGGAG
chr01	75797012	chr01	73.64	GAAGGATTCTGAAAGAGTTGGGGTGTTTACTTGTTAAATGTTTATATGTGTGTGGTTTGTAGCTTCATCCTATCGGAGTTGGAGTTAGAGTTTATTTTCTT
chr01	75808313	chr01	73.64	AAGCATTCTATCTTAAGTCTACTATTCAATATAATTCATACAAATTTTTGCCTGCAGATTTTACTCTCTCTCCCTTGCATTACATCCCAAGATCTTCTCGC
chr01	76439044	chr01	73.64	AAAATTTGTATGTGAATAATTTTATACATTTTAGTTTGACCACTTTGGTGACTAACAAACTATAGAAGCATAATACATGCATCAAGTGATCATAAATATGA
chr01	76798247	chr01	73.64	GCCGCAAAGAACATCCTCAAATAAATGAAAAAGGGTAAAAATGTAACTTACTGAGGTTTATAAGCCTTCAACATTATGATAAACCTTTTAATTTTATCACT
chr01	76858335	chr01	73.64	TTGATGTAAGTATTTGGGTTAGCACACACTTGAACTCCTTGAGATCCACATCTTTTATGTATGTTATAATTATAGTCCCCTCCTGTTCCACAACATGCTTT
chr01	76858372	chr01	73.64	CTTGAGATCCACATCTTTTATGTATGTTATAATTATAGTCCCCTCCTGTTCCACAACATGCTTTTTGTAGAAAGTTTTTATCGAATCCTGAAAATATATTT
chr01	76917899	chr01	73.64	TAAAGCAAACTTGTGCCAAGGTCATCATTGGAGTTTCGTGTTGCATTACATTAACTTTCATATTTTGAGTGTGTTATCATTAACTCTGCACAGAGCACATC
chr01	77325592	chr01	73.64	TCCCTACTAACTCAACAAGTGCGCTTCACTTTTGAGGTCAATTTTCCTATCAAACCTTTTAAGAAATTCTAATATTTAAAAACCATTTTTTTATTACTATT
chr01	75851515	chr01	74.7	AGCTTGGTTCTTGCTGAACCATTGAAGTATGAAAATTATAAATGGTACTTATATATTTTTTTAATTTCTCATTCGATTCAATCACTTATATATTGAAATTC
chr01	75885110	chr01	74.7	TTGTAACAAAAATTTCAGTTGTTTACTGTAGCTGACATTTTCTTTTGTCCCTTTTACTGGTAACTTCAGTCTACAGGCAACATTTTTACAGTACTCTCCCT
chr01	76216860	chr01	74.7	TCAATTTGTGCATATCTTGAAAATTTTATGAGACATTTATATAACAATAGGTATTAGAGCCACAAGAACATAATTAAGTGGTTGGGAGGTAGGCCTTCTAC
chr01	76391537	chr01	74.7	AATTAATGCAATTTAAATAGTAGTTTATAAAGGACATAAGAATTTAGTTGTGATTTTAAATTCATGGATTCTAAAAATTGATTTCTGAATAAAATATTTAT
chr01	75851413	chr01	74.85	ATAAGAACACATACATGCAAAATAATAAAAATAAATCTATTCCATATATTTTTACAATATGAACTCCACAATAAGTCAATTTTCTTCTTATTTAAAAGAAC
chr01	75851422	chr01	74.85	CATACATGCAAAATAATAAAAATAAATCTATTCCATATATTTTTACAATATGAACTCCACAATAAGTCAATTTTCTTCTTATTTAAAAGAACTAGCTTGGT
chr01	75851435	chr01	74.85	TAATAAAAATAAATCTATTCCATATATTTTTACAATATGAACTCCACAATAAGTCAATTTTCTTCTTATTTAAAAGAACTAGCTTGGTTCTTGCTGAACCA
chr01	79096400	chr01	75.88	TTATACAGTAATAAATTGTGCAGGATGATATGAGTGAGGCAAATATAATATACTGCTGCATCATTTATTTTTGGGGCAAAGAACGAGAGTTTCATGAATAA
chr01	79202837	chr01	75.88	TTAGACTTTGACCCTTATATTATAAACATCGTCATTCTTTTCTGGAGACAAGGAGTAGTATATTTCTTACTTTTAAATAATGAACTACCCATCTTGTGTTT
chr01	79204503	chr01	75.88	GGGGAAATTGGTAAATGCATTATTGTCTTATCAGAGAAAGTATCTTTTCATGAAATGTTTGCATTACTTTGAAACAAAATCTTCTCTAAGAAGTCACCCTA
chr01	79204510	chr01	75.88	TTGGTAAATGCATTATTGTCTTATCAGAGAAAGTATCTTTTCATGAAATGTTTGCATTACTTTGAAACAAAATCTTCTCTAAGAAGTCACCCTAGAACTTA
chr01	79452549	chr01	75.88	GTTTTGAATTAGAAACTCTCGATTCAAATTCTGAAAAGATTTTTTCGTGTGTTTTCATTTAGGTATTAGGTAGTTAAGTCAATCACATAAAATATTTCATT
chr01	79476265	chr01	75.88	CCTTTGATATATTCATCTATTGCCAACGTGAATTTGTGCAAACTTTACTATTTCTCGCCACAGCATAAATTTCAGAAGTATCAAGATGTAACTTGTGTCTA
chr01	79476307	chr01	75.88	CTTTACTATTTCTCGCCACAGCATAAATTTCAGAAGTATCAAGATGTAACTTGTGTCTACTGTCTAGCACTAGGAAATTTGTCATAGATAGGTTTAGTCAT
chr01	79675471	chr01	75.88	TGCTACTTGCCTTCAATCGGGAGAAGGATGTCCTGCTAAAAATTTCAGTTTAAACTGCTCATATGCTTTTCACGAGCATATTCCATCAAAGATAGTAAATA
chr01	79793635	chr01	75.88	TTAGATCACTAATTTGAATTCTTAGTGCATGTAACATTCTCATCTTTTTTCTATATACAATTCCTTCAAATAAGTGAAAGGAAAGGAACCAAACCTATTAT
chr01	79813200	chr01	75.88	CATGTACATTCCTAGGTATATCTCTTTTTCTGAAATGACCTCTACCACTCAATCACGAACTACTTGGTCTGCAATAAATGTCTTCAATATCCATTTCACTT
chr01	79823749	chr01	75.88	TCATGTTCATTGACCAATTTAATTAATCAAAATAAATTAATTTATTGAAAATTTGACTTTAAGAAAACACTAAATAAGAGTTTTAATGGTCAACTCACCTA
chr01	79842265	chr01	75.88	GGTTGTTTTCTTATTTATGAAGGTGAATATTATCATGTCTCATATAGCCATATTTCTCAAATAATGTATGTCAGAAATGTAGTGTCTTTAGCTCCAGTAGA
chr01	79842323	chr01	75.88	AAATAATGTATGTCAGAAATGTAGTGTCTTTAGCTCCAGTAGATGGCAGAGAATAAATTTGAATTTTCATGTGGGGAAATTCCCCCAAAAAACAACAAAAT
chr01	79843686	chr01	75.88	TTCTCTTCAAAGAAGGCTACTGATTTGTGGCTCATTTTCGACATTGTCAAAGCCAAATACACCCACCAAAGAACGACATATCAAAGGAAGGATCAGAATTA
chr01	79872351	chr01	75.88	TTAACGGAATGCATCATTTCTTTTTGTCTGACTTGATAAAGATTTGTGAGTTATAAGAAGCCAAAAGATATGTCTGTTTTTTGGAAGAGATCTTTTAAGTA
chr01	79885356	chr01	75.88	CGCTGCCTATCCATCCTGGAGAAACCAAGGATTTAACTTTCACCGAACAACAGATTACTGGGAGAAATAATGTTAAGGGCAGAAACATGAAAATGCACCAT
chr01	79891845	chr01	75.88	AATTACTTTGAAAATGGTAGAACATCTTAAAAATCTTAAGTTAAAAATCCGTCTACTTCATAATTAATAAGAGTAAGATTGTAGTCATTATTTTCTTAATA
chr01	79921263	chr01	75.88	CTAAATAATTGTGGTAGTAGTTATTTTTCTTTTTTTTAGAAAACAAAAAATAAACTAGTTAGGCCAAGAAAATTACTAAAAACTTCAATCGATTTGGTTTT
chr01	80081011	chr01	75.88	GTACCAATGCTATATTTTCATAGAATTACAGTAATTTCATATTGAAGTCGTATGAGCAAATTTTTATATAAGACATGCGTAGTAATTATTACTCTACTATT
chr01	80289092	chr01	75.88	TACTATTAATTTTACATCTATTTTTACCTGATATTTTGGGTTTATGTTTTTCAGGTTATTCAACCATGGAATTGGAATCCATTTATTAGGAAAAGAAGATG
chr01	80420015	chr01	75.88	TTTCCTATTTTACCTGACACTCTTTCTTTTTTAGTCTATCTAAAAAAGAATATCATCTTATTATAATTAGAAACAATTAAACATTAAAATATCCATTTTAC
chr01	80557755	chr01	76.67	TTGCCTTAAAAAATTAGTTCAACTTTTTCAAACTTCAAACTATAAAATTTGCAATATTTTTTAAAGATAAAAATGGGGAAATCCCGAGTTATTGAGAATTA
chr01	80558493	chr01	76.67	GATGACTTATTTGGTTGCATATTTAGATGCAAGTAAAGAACATGTTGAACCTACGCACAATATTTATTTAGTAGTGATAGAGCTTTAAACTTGCCATTTAT
chr01	80736811	chr01	76.67	CCAAAAACAAAAATGACTTAAAATAAGTTAAAAATCAAAAGTAAATCCCCCCTACTTTTTATTTTTTAACTTAAAAATCATTTCACTTTGACTTTATTTTT
chr01	80775302	chr01	76.67	ATTATTGTACATATCCGACATAGAATTAATAAGCTTATCATAAAAATGTAAAATGTGCCTCAAAGATCGATCAGCGTACACACTAATTTAATAAGATTTAT
chr01	80933657	chr01	76.67	CAGGGAGCACCACCAGAAAACCTCAGCTTAATTGATTAAGTTTAATAGGCCTCTTTACTGAAATAAACAAACCATTGAAAGAATAGAGAAGGTTGGCATAC
chr01	81280214	chr01	76.67	AGAAATACTTGTCATTTCACAAAATTAATGCGTAAATGACATTATTCTTCATATTAACCTTGAAAATATGAAATTAACCAACACAGGAAACTAAATAATTA
chr01	81410178	chr01	76.67	AGCTGTGCCTGGATATCCTTTTTCCCCTCATCAGTTTCATATTTCTTGGAATATTTTAGGAAGGCCTTCTTCTTGGATTTGCACCAGTTCTTGTAGAACCT
chr01	76164982	chr01	77.5	ATGGCAAGTCCACCTCTCAACATCTTACATTAATTATCTAGCTAAATGAGGTATCCAATAAGTCATCGCTTCTACAGCTACTGATGTTGATTTCTCATGCT
chr01	76164994	chr01	77.5	CCTCTCAACATCTTACATTAATTATCTAGCTAAATGAGGTATCCAATAAGTCATCGCTTCTACAGCTACTGATGTTGATTTCTCATGCTCTTTCATTTCCA
chr01	76187524	chr01	77.5	TCAGTATTCACCTACATAGCACATGATAAAGTTTTAGCATTCATCCCTTATTAAAGATATCACATCTTATGGTCCACATAGAATTATTAAACCAGTCCACC
chr01	76211509	chr01	77.5	ATTGTTACAGAGAAGTCAAAATAAGGGGAGCTAGGTGTAATATACCTAAACCACAAGAGAGGTTAGTGTTACAAAACGTAACCTGGAGGAAGTTCTCTAAA
chr01	76211574	chr01	77.5	GTGTTACAAAACGTAACCTGGAGGAAGTTCTCTAAAATTATCCCTTTACTTGAGTACACGACTTTGTACTATCTTATATTGATAACATATGAGAACAAATA
chr01	76211633	chr01	77.5	GACTTTGTACTATCTTATATTGATAACATATGAGAACAAATATAAGGTCACAAGGCTAAGTGGATTTATAAAAAAAGAACACATGTTTTTGTCTGCTGTTT
chr01	76307441	chr01	77.5	GTTGAACAATGGTAATTTTAATACCTTTGAATCACTAATCTCAGTGGCAATGACACAAAAGAGAACAAAAGGGCATTTTTGGCTCAAAGAAAATATTGCTT
chr01	76423593	chr01	77.5	TACTTCATGGGTCCTAGGAAAAATGATAGAACTTGAGTATGAAGTAAATATACCTAAATTTGCTTGCATGAATTGTATATTGATTATTCAAAAAATAAAAA
chr01	76443076	chr01	77.5	ACTAGTTTTTTTTTTTTGGAGAAGTGCCTCAACTCTTCTGTGGATATCCAGGATGCTCTATTGAGAAAAACTGATGAAGTTACTTCAAAAATATGGTCCTC
chr01	80937219	chr01	81.77	TGAGACCATAAAATGTACTTACCTGCTAAATTGCTCAATTGAAAGAATGGAAGCTACAGAAAGATCACCATTCGGTGTTTGGCTATCAACAGTCTGTTCAG
chr01	81022454	chr01	81.77	TTTATCCTACTATTATCTTCTAGAACTTTATAGTGTTCCATAGTTCTATAGATACTTTTTAGCTAGTACAATTATCTTACAATAGTAGAGGAGACGGAAGC
chr01	81043839	chr01	81.77	AATCGTAAGCGTATTTTTCTTACTCTTTAAGTTAATATCCTTCTCATATACGATTAATTAAAAAACACGTTTATATATAGAAGAAGAAGAAGAAATGTTGC
chr01	82413015	chr01	81.92	TTGCCCAATGGAAAAAGATATTCTAAATGTAATCTGGATCAGATATCCTCTTGTTGTACATTTAAGCATGCCATATTAGTTTACAAAGAATACTGAGACGA
chr01	82646491	chr01	81.92	TGAATTATCTACTGAACTGCAGCTAGATTTCATGCATTTTGGGGATGAATTGTTTCTTTAATGTTCTTGCTATGAACTGGATAGTTTCTGTGGTGTGCATC
chr01	82662496	chr01	81.92	TTTCTTTCTTTTCAGGTTTTACGCCTCATTTGAAGTATTAATTGCGAATGGTGTTATTTTTACTTTCTTAGATAAAATAGATACTCTAATGGATTAAACTG
chr01	82662529	chr01	81.92	AGTATTAATTGCGAATGGTGTTATTTTTACTTTCTTAGATAAAATAGATACTCTAATGGATTAAACTGGTGCCTAATATAACTGTTCTATGATGTATTTAC
chr01	82702749	chr01	81.92	AAGAGTTGACCTGATCATTTAGATCTTGATTTCTCTTTACTTGCACTGCCATTTTAGTCTTATGGCAAACACTATAAAGGCTTATTTAGTTTATTGCTGTG
chr01	82705453	chr01	81.92	AGTTGATGTCTAGAACTTGAAGATTCCAGTCGATACTAGGTGTTATTTTAAAACTTGTAAAGCATCTGTCAATATTATAGCCAAGAGCTCGCCTTATGTAT
chr01	82745660	chr01	81.92	TTACAATTGGAAAAGACAGCAAACGAAAAACTAGAGACACAAGACAGCTGTAAGTAAACGAATTTAGAACAAATTTCAACAACTCAAAATAAGCCTTAAAA
chr01	78066200	chr01	82.53	CTAACTTTTATTTAATATATGCTGAACATCCTAAAAATGCAAACGTATTGCTGCAGTAAATTTTTCCTTCTGGTGCTATATAAATGAAATGAGACAACATT
chr01	78069261	chr01	82.53	CTATATCCTTGATTTTTAAATGATTTAGAAAGTCACTGTTATGGGAGTTCGGTGATCACTGTTTCCCTATATACACCCCCTAAAAAGAGAGGTACAAAATG
chr01	78203992	chr01	82.53	TTTATATCCAAAATGGTCACTTAAACACCTAGGTTAACTATGTACTTTTTGCTTTATATTAAGCGTAAAGTTCACTGATTATGGAAAAGAAAAAAGTGTCT
chr01	78244424	chr01	82.53	ATTTTATCAATTCACGCTTTAAAAAACTTATTGAAATTTTACAAATAAATGTAAACACTTTAAAAAAGAATAAATTGTAAGGATAATATAGAAATAATTTA
chr01	78538500	chr01	82.53	TACAACTTTCATTTGTTCTTTTGGTTGTACATAATGCATTGAATTATTGGCTACTCCACCACCTTTTTATCACTTCAACTGCAGTCGCTTTTTTTTCTTTT
chr01	78560032	chr01	82.53	TCCCTACCAACTAGACTAAAATACTAGAAATACTTGTCAATTAAGATAAGACTCAATTACCTCAAGAGATTTGTGGCTAATATTAGTAACCAAAAACGTCA
chr01	78592935	chr01	82.53	ATTTTTTTTTAAAAAAAAATTATTTATAAACTAGTGTTCAGCCATGAAAAATTTCAATTCAACTCAAAAAGTGCATCACAAAATTTACCACACGGATCCTG
chr01	83604381	chr01	83.72	GATGTATTATATTCTAGCTTACACCATTCTACCAAGAAACTTTACCTATTCCTTTTTTGTCCATCCAATAAATCCTAACCCACTTTCAGGAGAAAGCTTTT
chr01	83604394	chr01	83.72	CTAGCTTACACCATTCTACCAAGAAACTTTACCTATTCCTTTTTTGTCCATCCAATAAATCCTAACCCACTTTCAGGAGAAAGCTTTTCACCTCTGTCAAT
chr01	83604395	chr01	83.72	TAGCTTACACCATTCTACCAAGAAACTTTACCTATTCCTTTTTTGTCCATCCAATAAATCCTAACCCACTTTCAGGAGAAAGCTTTTCACCTCTGTCAATC
chr01	83604397	chr01	83.72	GCTTACACCATTCTACCAAGAAACTTTACCTATTCCTTTTTTGTCCATCCAATAAATCCTAACCCACTTTCAGGAGAAAGCTTTTCACCTCTGTCAATCCA
chr01	83310781	chr01	84.77	GAGATTTGAAGTAGAAATATCTTAAATTGCTACTATACAAATGAATTACCGTGCTATTTGATAGTATTTATCAAAACCGGAAACCATCAGCATTTGCTTGA
chr01	83310812	chr01	84.77	ACTATACAAATGAATTACCGTGCTATTTGATAGTATTTATCAAAACCGGAAACCATCAGCATTTGCTTGAACAGCTGTGGACTCTGGGGTAGTGCATAAAA
chr01	83426882	chr01	84.77	TATAATCTACACATAACTATGAGGGTGGAGATGAGACAACAAGTGTGTGGCGTCACTAGCGAAACTTATTTTCTTAGAGCCAATTTTTTTTAACAAAGAAA
chr01	83572005	chr01	84.77	ATTTGTAAGTGCACTTTTAATCCTTTAAACAATGAATCTTCACAAATTTATCGAATTTGATATAATCCTAAAATACTCAAAATTTAAATATTACAAGGACC
chr01	83574954	chr01	84.77	TGTTATATATATTATGAAAAAAATAAAAGAAATGTATGATGCGAAATTTAGTATATGTAAGATCGCAAGAAAGGAAGAACGACTTTTCAAACTGAGATTGA
chr01	83574963	chr01	84.77	TATTATGAAAAAAATAAAAGAAATGTATGATGCGAAATTTAGTATATGTAAGATCGCAAGAAAGGAAGAACGACTTTTCAAACTGAGATTGAAGTTACAAA
chr01	85493181	chr01	87.23	GAAAACATAAAAATATCTCTAAATAAATATTTTGCAAATGTCCTTAAAAGCTTGAGTAGAAAATAAGTACTTCCTTTTATTTTAGAAAAAACATGGATAAT
chr01	85493184	chr01	87.23	AACATAAAAATATCTCTAAATAAATATTTTGCAAATGTCCTTAAAAGCTTGAGTAGAAAATAAGTACTTCCTTTTATTTTAGAAAAAACATGGATAATTAA
chr01	85493194	chr01	87.23	TATCTCTAAATAAATATTTTGCAAATGTCCTTAAAAGCTTGAGTAGAAAATAAGTACTTCCTTTTATTTTAGAAAAAACATGGATAATTAACTCTAAACGG
chr01	82013990	chr01	87.31	TCTATAATATTTTTCTTTACAGAATGTAAGATCCTTATATGTGCATTCATGTTCTTCCATATTGTAGAGAACCTGGAGCTGAACAGAAATTTAAGGAGATC
chr01	82013998	chr01	87.31	ATTTTTCTTTACAGAATGTAAGATCCTTATATGTGCATTCATGTTCTTCCATATTGTAGAGAACCTGGAGCTGAACAGAAATTTAAGGAGATCAGCAATGC
chr01	82070682	chr01	87.31	CATGATTGACACTAGCTAGTTGTTTGTGAGACATCTTTTTGTCTTACAAAATTTTATACTTTTGTGAGACAAAAAAATACTCCCTTTATTTTATATTAAGT
chr01	82118520	chr01	87.31	TTTAAGCAAGAATAAACTTATTTATTACTATTATAATAGGATAATTTACTATACTGAAATTCTCCAATTTTATTATTAACAAACAGTCTTAGATGAATTGA
chr01	82416951	chr01	87.31	ATTATGTAAAAACTATTATAAACGGTAACAATTAGCAACTTAGAATATTTAAAAAAATATATCAAAAAATTTAGCGCCACATAAATTAAGGAAGAGGAAGT
chr01	82421514	chr01	87.31	GCCAAAACTCAAAATTTATTACTGTTGCTCATAAACGTACTGGAGATTACGTTGAATGTAACTGTTTGATGGATCAAATATATGGCTTTTGAAGGGATTCG
chr01	79190818	chr01	88.33	ATACCAACACAGAGCCAAATTAGGTAACTACAAGCAGTTTGGATAACTTTTAAGAGAAAGCTTTTTGAAGGAAAAAGAGTGTGCAAAATAACCTTGTTTGA
chr01	79455971	chr01	88.33	AATGGATGTAGTTAATGTTTCATCTTCAGCGAAATTTAAATGTTCAATTCCTTTGTGACAGGGAACACGTGATTTTGCAAAGGAACAGATGGCTATAAGAG
chr01	79718746	chr01	88.33	ATTGTGAAAATTAGATGTCTGATCTACTTTGAGCAGTGTCATTTCATATAAGAGGGAGGAATCCTATTTTTTGTAATATATGGATTAGAAAAAAAGAAGAA
chr01	79761863	chr01	88.33	CTATCTCATTCAATAGAGAGATTATCAGCAACAATGAAACAACACGAATTTTCTGTCAAGACTAGGAGTTATTAATCGAGGATATAAATGTCAGACTCTAT
chr01	79820945	chr01	88.33	AGACCAAATTCACTCAACATATGAATAAAGTTTGAATATAAAGCTCATTAGGGAATCAACCCAAGTTTGAAAGACCATTTACCCATGCCTTAAGTCTTTTA
chr01	79821018	chr01	88.33	ACCATTTACCCATGCCTTAAGTCTTTTAACATGGATTAATTAGCACTCCGGTAGCAATAAAATCACACAAATGTTTAGTCTGGGAAAATCTCATTAGTGGA
chr01	79821035	chr01	88.33	TAAGTCTTTTAACATGGATTAATTAGCACTCCGGTAGCAATAAAATCACACAAATGTTTAGTCTGGGAAAATCTCATTAGTGGACAAAGCGAAAAGCAGTC
chr01	79827630	chr01	88.33	TAGTTTTACCCCTACCGTTACTAATGTCACCATATATACTCTTTATTTGAGGGAAAGTCCCAAATTAACTTAAATTGCCCAATTTAATTAAAATAGCCCGA
chr01	79827646	chr01	88.33	GTTACTAATGTCACCATATATACTCTTTATTTGAGGGAAAGTCCCAAATTAACTTAAATTGCCCAATTTAATTAAAATAGCCCGATTTTCTCTTTTAATCA
chr01	79842246	chr01	88.33	ATAAATATATGGATGGTAAGGTTGTTTTCTTATTTATGAAGGTGAATATTATCATGTCTCATATAGCCATATTTCTCAAATAATGTATGTCAGAAATGTAG
chr01	79891684	chr01	88.33	TATGAATTTATTTTTTGACTATTTTGCCATTATTTATATCTTAAGATATATTCTCTCTGTCTCTAATTATTTGCTCACTTTTTCTTTTTTAGTTGTGTCCC
chr01	79900081	chr01	88.33	AAAACGAATCTAATATTTTTTACCAAATATCAGAAAAGTATTTTAGGTTAGCCTAATCTCACGTAAAGTGGACATTATATTGAAAATTATTAATCAAGAAA
chr01	79902833	chr01	88.33	AGAAAAAAGGCAACTTTTTATTTCACCACTAATAATAATAATTCTTTTATTGTTAAGTCCCTGTCAGTCTATTAACAGATTTAATTTTAGGCATAATACAT
chr01	79903025	chr01	88.33	GGTAAACATGCATATTCTACGTGGCATAATACACGTAGGACGACACGTAGAATACAAAATTGTAGGACGTCATATAGGGATGAATAAGTCTATTTGTTACC
chr01	79903055	chr01	88.33	ACACGTAGGACGACACGTAGAATACAAAATTGTAGGACGTCATATAGGGATGAATAAGTCTATTTGTTACCCAAATTCATAGTTATCAGTTAAAGTCAAAT
chr01	79914551	chr01	88.33	ATACTTAGTTAGTAAGCTGTTTAAAAGTTGAAATTTCAAACAAGAGTAACATCAGTTCTCTTGATGCAAGTGTTGAATTGCTCAGTCTGTTAGGAGTTTGA
chr01	80567394	chr01	88.33	TAAAGGCTATAGATCTTAAATACAATGAGAAAAGTCTTACTCTCAAATGAAGATTAGCTAATGATGTTTATTTTAGTGTACACCTTTTATGTAGTCATAAC
chr01	85251994	chr01	88.79	TGCTTGATGATTCTTTTTTCCCCTTTCGTGATCCTATTTGTTATTTTCTTTTGAGTACTGAGATGATTGGAAAGAAACAAGAAAGAGGATCTTGATCCCCT
chr01	85255720	chr01	88.79	TATCTACAGTCATGAACTTTAAATAGTTTGCTTATTTTATTGTGTTAGAATAGAGTTAAGTTCTTAAGTTACATATTGCTCCATATTGGACAAGTACTATA
chr01	85267455	chr01	88.79	TAGTACTTATATATGTTGAATTTTCTAATTTTATACTGGCATTATGTATAGTTAATTATTCAATCAATTGATGTCATAAAATTGTATATATCATTTCCAAA
chr01	85298480	chr01	88.79	AAGTTTCCCCTTGTATATTGTTCCAACTACATATCCGGTCAAATGTACTCTGGGGTATCACCCAAACAATTTGAGCTAATGCTGCAAAAAGTTGTCATAGT
chr01	85346223	chr01	88.79	TATCTGTATTAATAAAATGTCGCTAGACACCCTGTCTAGTGGTATATATTAGTTAGAAAAAAATCACATAAGAATTCCACATTTTACACTATATCTTGGTC
chr01	85355293	chr01	88.79	CTCACAGGGACGGGATAGGAAAGATATAAATGCACTTTTTCAAGTCTCTGAGAGTTTGCTGGACCCACAAAGTTGCTTTTTTGGGCAATTCAGACGAGTGG
chr01	85519624	chr01	88.79	TTGCATTGTTAAAACATTGATTTGATCTTCCTTAGAGATCCTAATTCCCGGGTATCGCATATTTCTATGTTAGGAGTTAAAAGAGTTGTTAAATGCCTATC
chr01	85691304	chr01	88.79	CCAGCTAAAGCCTCAAAAGTTACTTACCGATTGCTAAACATGCTTAAGGATCCCGATATAAGAACTCGAGCATTATTTCTTGCCTGCAATTGGAAACAATT
chr01	85723037	chr01	88.79	GGTAAGAAAATAAATGATTCATTGCATGTGGCTACATTAGTTGGTCAAAGATTCACAACATTAGCCATAATTTCCTAATTTTTATTATAGTAAAACAACCT
chr01	81596013	chr01	90.05	GTTTTCCTATACAGCATCCATTTTCACAAGCCCCTCATGAATTCATTTCATGATTCATAACAGATTGTAGCCTCTAGCTCTCAATGTTATGTTTTGACGCT
chr01	81607027	chr01	90.05	TGCTAATTTAGATGTTGTTACATATAAATCGAGGAGTAGATATATGAACTCACAATTTATGTTTTTTGGTATTTTATTTCTATACAGAAAATTGATATTTA
chr01	81768181	chr01	90.05	CTCTCATCATGTGAACAATGCCAGTACTGATGATGCTGATTTCTTTGTCCTATTTATACCTATTTTTTTATAATTATATTTTTTTGGCTTATTGTTTCCTA
chr01	81880623	chr01	90.05	TCTTCCCTTGGGGTTTAGTTGAGTTGATTCAAGAAGGTTGATGCAAGCTCCGTTGAGCTTGCTCTCCATATGTTGGTTATTTTCTTGCATATTGGCCCAGC
chr01	82343565	chr01	90.05	AAAATATTAATTTTTTTAATGAATATGTCCAAGCTAAAAATAGTCATATTATGAAACGGAGGGAATAGATACACATGGAATGCTAAGATTTACGTTTATTT
chr01	82418116	chr01	90.05	CTTCCTTATCTTAGAATGGGAAGAACTATTATATATATTTGATGCTTTTAGTTTATCATCGTTTTCGTCTACAGCAAGAAAGTAATAATTGCATATTCTGA
chr01	85067406	chr01	90.27	TCCAATTGAACCAAGATAGTAATATTGATATGTAATTAGAGAAAATAGAGATAGTTTACTGATGTCAATTCCAAACACTGAAATTACAACGAAACGAAACA
chr01	85067408	chr01	90.27	CAATTGAACCAAGATAGTAATATTGATATGTAATTAGAGAAAATAGAGATAGTTTACTGATGTCAATTCCAAACACTGAAATTACAACGAAACGAAACAAC
chr01	85067414	chr01	90.27	AACCAAGATAGTAATATTGATATGTAATTAGAGAAAATAGAGATAGTTTACTGATGTCAATTCCAAACACTGAAATTACAACGAAACGAAACAACAACTGA
chr01	86155181	chr01	90.37	ATATTCATTGAGAGCTAAACTAAAGAAGTGTTGTACGGTTAAGTGACCAATGAAGTCAACCTCCTTTCTATGAGAATATTCTTGTAGAGCTAAATTTTATT
chr01	86275629	chr01	90.37	CATATGAATGTCAGCCCATCAAGCATTATTTGCTGGCTCACGATGAAATTATTTGGGTTGGGCCAGATAATGGGCTATAAAGGTCTAGATTAATTTCATGA
chr01	86616454	chr01	90.37	TGTGAATTATGATATTTAAATACTCCTCGAATCTATTTTTCAACTTCCGAATTTTCTATTTCAAATTTGAATTGAAAGAATGAACCACGTCATAAAACAAA
chr01	86478973	chr01	91.17	GACGCCGCAGGTAAGTATTCACTCGGCTAAACCCTTATTTCTATTTTACATAATATTTACTCCTAATTATTATACAAAACCAATTATAAAAGCCTGAAAGT
chr01	86513602	chr01	91.17	TGCGATTTTATAATTTTTTGTTTATTTGGTAAGAATGAATAAACAATTGGGGTTATTTTAATAGTTTCACAACTTATGAGATTCGTATATTTATGAGAAAA
chr01	86513606	chr01	91.17	ATTTTATAATTTTTTGTTTATTTGGTAAGAATGAATAAACAATTGGGGTTATTTTAATAGTTTCACAACTTATGAGATTCGTATATTTATGAGAAAATGTA
chr01	86530979	chr01	91.17	ACGAACCCAGTAAATCCTGGGCTGAAGAATATAAATCACCTGCAACTGGAGTTTCTTTTCAAGGTCATCAATATACTTGTCTGATAGAAGACCCTGTTCTG
chr01	86567029	chr01	91.17	ACGTTACTTATCTATCACCTTTCAAATTTAAGATACAAGTGCATTATCTTCACTTTATTTTATCTTCACTTTATTTTGGTTCGATCCCAATCTTATTAAAG
chr01	86607622	chr01	91.17	CCACTTTCCTCCTAACCTTGAACGTATTTGACAACTAATTTCGGTTATGTCATTCTTCTGCCATCACAGATTTCCAATTCTAAGTGAAAAATGAACAAATT
chr01	87146807	chr01	92.79	TGAAAAATGATTAGTAAATGGGGTATTTATAGGGGGGAAATAGTGGAAGTATATAAGGTTCATGTATATGAAGACAAATAAAATAGAAAAACACAAAAGCA
chr01	87213530	chr01	92.79	TTCATATTGCTCTTTGTTATTCGTGGAAACTTGTACTGCTCCTTTCTTTAAACTCCATTTTGATCCTATTCCTTTCTAATGTGTCAGTATTAGGATACTTA
chr01	87223256	chr01	92.79	GGGAGAAGAGAAAGAGAATTATCTGAAACTGTAGTTTAATTTGTTCTTCAACTGTTTCAGATCTCCCTCTCCCAATTCCCTTGTAAGAATTTTGTGGAACT
chr01	87239274	chr01	92.79	AAGTGAATAGGCATTGTCAGACACCCATTTGTGTAAATGATACATGGAGCAATCGAAAAATCAGCTTTTGAGCATCACCTAGATTTGTTAAGGTATGAAGC
chr01	87292062	chr01	92.79	TTATATTATATTATTTTTGATGAAATAAGGCTTGGTAAAAAAAATGTTTATAAGCTATTTCCTCCCCACTCACTTGTCCAATTTTTACTTATTTAGGCTTA
chr01	87326792	chr01	92.79	TTCTATGAAAAACTTAAACAAACAAATAAACAAAAATAGTTGGTTTATTTATTCGACTATTATTTCGTTCAGTCAAAGACTTGTAATATCCCTATTATTAT
chr01	81019023	chr01	92.88	ATAACTTCTCTGAATTGACCTTTCTCATATTTCCACTCCAGCAAGAATGACTTACTACTAAATTATAAATAAAGATGATAGTCAAATGAAGATTCCACAGA
chr01	81019026	chr01	92.88	ACTTCTCTGAATTGACCTTTCTCATATTTCCACTCCAGCAAGAATGACTTACTACTAAATTATAAATAAAGATGATAGTCAAATGAAGATTCCACAGATCT
chr01	81019031	chr01	92.88	TCTGAATTGACCTTTCTCATATTTCCACTCCAGCAAGAATGACTTACTACTAAATTATAAATAAAGATGATAGTCAAATGAAGATTCCACAGATCTGAAAC
chr01	81019032	chr01	92.88	CTGAATTGACCTTTCTCATATTTCCACTCCAGCAAGAATGACTTACTACTAAATTATAAATAAAGATGATAGTCAAATGAAGATTCCACAGATCTGAAACC
chr01	86913018	chr01	93.22	AAAGAAGGCCATTTTACTTGATTTTGTAGACTACTCTGTGTGAATTGTTCTTTTGCTATGTTTGTTCAGCGTCTTTAAGCTGTAATTCTTTGCTTTTGCAG
chr01	86941538	chr01	93.22	AGCTTGTACCAGCAGCGCAATGACACTTCTATGCTTTTCATGAGTACACTATTAATGATATCTTAATTTCTGCCAGTTTCTCTAAATAGATATACATATTT
chr01	86941544	chr01	93.22	TACCAGCAGCGCAATGACACTTCTATGCTTTTCATGAGTACACTATTAATGATATCTTAATTTCTGCCAGTTTCTCTAAATAGATATACATATTTTTTCTT
chr01	84251452	chr01	93.85	ATTAATTTTATTTTATATTGTTGTAGTATCATTATATACTGATTTAGTATCAATTAAGTGAAATTATCAACCTTAATGATACCAATATAATATATGATACT
chr01	84393246	chr01	93.85	TGCCTACTGAATTGGTAAAAAATTAACTCTAAAATATTCCCTACTGCTTTATAAGATCTGTTGGCAGAGCAGATTATTCTTTTAACTCTTGTAATATGATA
chr01	84556002	chr01	93.85	TGCCTAAACCTATGAAATTAGGCACCTCTAAGATGTGCCTTCATTGTTTTATTAGTCTTTATTGCACAAGAAAGGCATAAAGACTAGTCTTTGAAAACACA
chr01	84645495	chr01	93.96	ATGCCTTGGCACCGGTACTTTTTCTTACAGTTATGATGGTACTCAATGGGCCCACATAACCCGATCTATACATGGTGTACATGTCTTAAGTGGAGAAGACA
chr01	84645496	chr01	93.96	TGCCTTGGCACCGGTACTTTTTCTTACAGTTATGATGGTACTCAATGGGCCCACATAACCCGATCTATACATGGTGTACATGTCTTAAGTGGAGAAGACAA
chr01	84645502	chr01	93.96	GGCACCGGTACTTTTTCTTACAGTTATGATGGTACTCAATGGGCCCACATAACCCGATCTATACATGGTGTACATGTCTTAAGTGGAGAAGACAAACCAGT
chr01	84645503	chr01	93.96	GCACCGGTACTTTTTCTTACAGTTATGATGGTACTCAATGGGCCCACATAACCCGATCTATACATGGTGTACATGTCTTAAGTGGAGAAGACAAACCAGTC
chr01	84645507	chr01	93.96	CGGTACTTTTTCTTACAGTTATGATGGTACTCAATGGGCCCACATAACCCGATCTATACATGGTGTACATGTCTTAAGTGGAGAAGACAAACCAGTCTTTG
chr01	87852809	chr01	97.13	GAGACTCAGCAATCCTATTTTCAGAGAAAAAGACAACATCCAAGAAAGTTGAGTTAATCAGGAATATGAAAGGAGGTTTCGTAAGTTTCAAAGGTCTGAAA
chr01	87991508	chr01	97.13	TGTCATTGTTCTCATTTCTTTTCTCATTTGCTTCACCAACTATGTTTGTTATGTGAATCGATTTCAAAACATTTTATATATTTATTTATTTATACAAGAAC
chr01	88116906	chr01	97.13	AACTCTAATATCCAAAAATCTTCTTTCTTCTTTCCTTTTTTAAGATCCAAAGCAGTTGGCATTGAAAACCTAGTTGAGGTGAGGAAGATGACGGAAAGTGG
chr01	88323806	chr01	97.13	GATGCATTTTGCTTCAAGAATTAATTTATGATCTTTTTGGATATTTACTTAGTTAGAAACGACAATGGTGTTTGATATCTCCTAAAGTCTTGTGTGCACGC
chr01	88570504	chr01	97.13	TCTCTCCTCCTAATATGTATTCATTTTTTATACAAATTAGTTTTTATTTGATTTTTTCCTTCAAAAATTCGTGAAAAATACAAGAATGCCAATGCGTAGCA
chr01	83729411	chr01	101.93	ATGTCCTTAAAGGTTTTAGCGACATTGAATCTAATGGCATTTAACTAATGTCGGTAAAGATTTAGCACTCTTTATTAATGTGTCTATTTATTGCCGCTAAA
chr01	83734834	chr01	101.93	ATTTGTTTTAGACTTATAATTTTTTAACTCATAATAATAATATTAATGATCTGAATAATCCTAAACATATTCCTTAATACTATGATATTAAATAGATATAT
chr01	83734839	chr01	101.93	TTTTAGACTTATAATTTTTTAACTCATAATAATAATATTAATGATCTGAATAATCCTAAACATATTCCTTAATACTATGATATTAAATAGATATATTCCTC
chr01	83758000	chr01	101.93	TTTAACCGTCTGTAGTCATAGCATGAAAAAGATTCAATCTTTATAACATCACATCAAATATCTACTAAAAATGTCATACTGATGAATTATTCAATGAGAAT
chr01	84463473	chr01	101.93	CATTGTAGTTTCCTGGTACTATTAGTCAATCTTACATATGCTAGATGGGCGAAATTATTTTCATTATATTCTTTTTGAGCTTTTGAATTGTACAAAAAGAA
chr01	84467613	chr01	101.93	AATAAAAATGTGTAGCATATATCTAGTTTAGAGGTAAAAGAAAAATGAAAGTTATAACAAAACTACCCATCTTCAATAATGCAACAGAATGTCGCACATAA
chr01	84479668	chr01	101.93	TAAATAATATATTTTGGACACCCTTAACATAACAAGTTGCTATTTCTGGACATCTTTTGTAAAATTTCTGGCTCCGCCACTGTCTACGACTGAGTTTTGTT
chr01	84487578	chr01	101.93	GGATTTGTACTTTTCTACGTATATTTAGTGGAATTCTCTCGATCCTTTACTGTGTCTTCAGCTTCTTTTTTTCCGTAGTCCTGTTCTCTTTTATATGTCAC
chr01	84504263	chr01	101.93	TTCTAAAGTTCTTGGACAAATAACAACTATGCAAAGATGACAAGTTTCAACTATTAATTGGCTTGTTTTGGAGATCACCGACCCATGTCAACCTCTCAACA
chr01	84509439	chr01	101.93	AATTATTTTTAAGCTAAACGAGGTCTTGGGTTCAAGACTACTTAACCACATTTTTTAAATATGAGTAAAATATTTTGCAAAAAAAAACTTTGATAGAGGAT
chr01	84693361	chr01	101.93	CCTTATTCTCAAAGTATTAGAAGTTTTATTATTTAATTTTGTTTATATTAATTTCTCAGACCCGATTGAATACGTTCAAATATTTGTTCACTTTTTTATTA
chr01	84734211	chr01	101.93	TAAAAAATGATTAATATATTCAAACATTTTAACATCTTTATGAAAGTCGAAAGGATATGTTATTTTGTCAACTTATAATTGTCGTTGGTGTTAAAATAACC
chr01	84753746	chr01	101.93	GTATAAAAAAGTCCATGGAAGGGAATGTTATCCCGAATGAGATTCTATCTGGTGCGAATCCGAATTAATCGAACTCCAATATGAGTAAGCAGATGAGAAAC
chr01	84804717	chr01	101.93	TTACTATTTAATATAGAGTTGGTGGGTTTTGAGCACTATAGAATTGCAAGCTCTTGTCCTTTTGCTTTTGAAGAAGACATGAATTGTTGCAAATTCACTGT
chr01	84816368	chr01	101.93	ACTAGGGTCATAAAAAGTGGAGAACTAATGTCTTCCTATTTCTTTCCTCTGCTTTGCGTGATAGTAAGCCCAAAACTGTTAATCTCAAAGAAATTTATGAG
chr01	84819457	chr01	101.93	ATAAAGATATGAACTGATCAGTCCAACTATACTTTAACCATACAAATAATAAAAGCTTTACAACAAAGTAAAAAGATCTATTGTTTTAATACCTTATTGTT
chr01	84720179	chr01	102.75	TTTCTTTCCTTCTTTTCACTTTAATTTAAACTAAAGTGAATCTTCTTTTCCGTAACAGGGTTATGATAAAGTCATAAATATTTTTTTCATCTTTAGTTAGA
chr01	84720183	chr01	102.75	TTTCCTTCTTTTCACTTTAATTTAAACTAAAGTGAATCTTCTTTTCCGTAACAGGGTTATGATAAAGTCATAAATATTTTTTTCATCTTTAGTTAGAAGTT
chr01	84720188	chr01	102.75	TTCTTTTCACTTTAATTTAAACTAAAGTGAATCTTCTTTTCCGTAACAGGGTTATGATAAAGTCATAAATATTTTTTTCATCTTTAGTTAGAAGTTTTACA
chr01	84720191	chr01	102.75	TTTTCACTTTAATTTAAACTAAAGTGAATCTTCTTTTCCGTAACAGGGTTATGATAAAGTCATAAATATTTTTTTCATCTTTAGTTAGAAGTTTTACATTC
chr01	87414937	chr01	105.7	GAACTAATTTTTTCTATATGATGCATCGTTATTTTCCTCCTTTTTTCTCTCTTGTTTGTCATAAATTGAAAAAATAATATTTAAAATGGTGGACAAGATCG
chr01	87543167	chr01	105.7	TGTCACTTTTATGAATGAAAAAGAATAAAAAAAAATAATGTATCATATTATAAAAGAACAACAGGTTAATAAAACACAATTCATGTATATTATTACTAACT
chr01	87543171	chr01	105.7	ACTTTTATGAATGAAAAAGAATAAAAAAAAATAATGTATCATATTATAAAAGAACAACAGGTTAATAAAACACAATTCATGTATATTATTACTAACTCTTC
chr01	87543172	chr01	105.7	CTTTTATGAATGAAAAAGAATAAAAAAAAATAATGTATCATATTATAAAAGAACAACAGGTTAATAAAACACAATTCATGTATATTATTACTAACTCTTCT
chr01	87003645	chr01	105.73	TTCTACTGATGTGCATTGAATAGACATTATGTGAGCACCAGCTAAAGACAGTAGCACCTGAAGTATAACATGGTTTTGCCTTCCAACTCATTGTCATACTA
chr01	87043206	chr01	105.73	TGTATCGAATAATTCATTGTATTTTTTATACTTTACTTAAAATAAAATATTAATTATAAGATTTTTCTTTTTATATTATTTTATGCTTATTCATGTCTTGC
chr01	87043207	chr01	105.73	GTATCGAATAATTCATTGTATTTTTTATACTTTACTTAAAATAAAATATTAATTATAAGATTTTTCTTTTTATATTATTTTATGCTTATTCATGTCTTGCA
chr01	87059847	chr01	105.73	AAAATTTGTGTGGGAATTGTCACTGAAAATTTCAATGAGAAAATAATAATTTTTCAGTAATGAACATGTGTATTGTTTCATATGGAACTTGGAAGTGAAAA
chr01	87091033	chr01	105.73	CATTGTTCAAAACATCTCTGAGCAAAAGGTCAAGACCTGAAAATTACCCAATGTTATCAATTTTGATTTCTGTCTAGTAATTTGAAGCAGTGGGGCCTGCT
chr01	87186447	chr01	105.73	ATGATTTTTGTTTACTCACACTAAATTTCCATATTAAACAAGTTCAAATACAAATTAGTGATGTTTTAAGTTTCTGGACTTTCAATATCTAAGGAGTAACA
chr01	87280879	chr01	105.73	TTGCACAAACAACTCATCTAAACCTCTCTTGTGATCTTCATTCTTCACTCATCGTTCAACACATTATTTTTGTCAATTTCAAGCATGAATGACAAAGAAGC
chr01	87314584	chr01	105.73	TTCCTTTCCTCTAAATTTTTGTGACATAATTAAAATTCCGAGACTCATGACACTAACTATACTTTATACTTACTTGATTTTATTAGAGCTCGAACTTGTAG
chr01	87314585	chr01	105.73	TCCTTTCCTCTAAATTTTTGTGACATAATTAAAATTCCGAGACTCATGACACTAACTATACTTTATACTTACTTGATTTTATTAGAGCTCGAACTTGTAGT
chr01	87326955	chr01	105.73	AAGTTATATAACATAAAAAGTATAGAATTTATTAACAATAGAGAAATTAGTGAAAGAAATTTATATATAACATGATATGTTGCTATTCGTTACATTTTAGC
chr01	86408611	chr01	106.1	ATATGAAAACTGTATAGTCAGTCCACTGGCTGGTTTTGCCGCTATATCTCTCATTAGGAAATATACATACAACAACATACCAAGTGTACGTAAATGCTAAT
chr01	86408612	chr01	106.1	TATGAAAACTGTATAGTCAGTCCACTGGCTGGTTTTGCCGCTATATCTCTCATTAGGAAATATACATACAACAACATACCAAGTGTACGTAAATGCTAATT
chr01	86434114	chr01	106.1	AGATAAATTACATTACTTGCAAAGTTATGTTCATGATTTCACAAAGAATAAAAGTGGAAAGTATGATTTAAATGACGTTTTGAATATTTTTCTTAATAAAT
chr01	86434139	chr01	106.1	TATGTTCATGATTTCACAAAGAATAAAAGTGGAAAGTATGATTTAAATGACGTTTTGAATATTTTTCTTAATAAATGTGCCTTGCATCACAAATTCAATTA
chr01	86459121	chr01	106.1	TTCAGCACTAGAGAACAAATTAAATAAATTGCTCATCAGAAATCACAAGTAGTAATTTTTGTGGATTGGGACACAAACAACAGATAAAAACTCTGTTATAC
chr01	86540047	chr01	106.1	CGCAATTTCTATCATTATTTATTATTTTTTATGACTCGACAATCATATTATTTTATTGTTAGCATCATATGTTATGATTTTCCTAATTTTTGTTATGCCTA
chr01	86550827	chr01	106.1	CAAATACAAAAAACTAAATTACAATATAATTGCAAAAAAATAGTTTTAAATTTTTTCTTTACACTAAAGAATGAAAAAACAAACAAACAAGAAACTCGAAT
chr01	86607562	chr01	106.1	TTTAACGAACACAAAAACTTTTCCTCCCAACTTAACCCAATTCCTTTTTAAAAAAAACCACCACTTTCCTCCTAACCTTGAACGTATTTGACAACTAATTT
chr01	86607563	chr01	106.1	TTAACGAACACAAAAACTTTTCCTCCCAACTTAACCCAATTCCTTTTTAAAAAAAACCACCACTTTCCTCCTAACCTTGAACGTATTTGACAACTAATTTC
chr01	86755451	chr01	106.1	ATGAGAAAAACTTTGTGAAACCATCACAGGTAATTACCACAGTAGATTAGATTAGTAAACGAAAGTTGTCTTTTCAAAAGCATTCCAACCTTATCAATGAA
chr01	86882994	chr01	106.1	AGGATCATATGATAAATATTTAATCTATAGTGTGTTTACATTAATTTAATGAAGTTAATGTTAAAGAGTAAAAATAACATATTATTTAGGCTTAATATATT
chr01	86944145	chr01	106.1	TAAAACAGAACTATTTCTTACACTTTGTAAAGTGAAATTTTTTCTTACACTTTATAAAATGGAAGAAGATTACATTTCAAGAAAAGTTACTTTCACGAAAT
chr01	282018	chr01	0	ATAACAGTGATGTTCACATCTCATCGAATACTATACCACAAAAAAGAAACTTGAATTAGTTAGGAATTTCACCGTTTTAACATTTTTTTTTTTATAATATA
chr01	345164	chr01	0	TAGTTCCGCTACCTCAACTTCTCTATTTCTAGATCATCTTTGACTTTGTATATAAGATGCTTTGATCTCACTTGCACTAATTTTACAAAGATGGGAAAAGA
chr01	345155	chr01	0	GAACTTCTGTAGTTCCGCTACCTCAACTTCTCTATTTCTAGATCATCTTTGACTTTGTATATAAGATGCTTTGATCTCACTTGCACTAATTTTACAAAGAT
chr01	1524667	chr01	0	TGAGAGAGTGACGTTTTAAGAAAGACACGCTAATAAATCATTAATTTCTCCTCCAATTTAATTTTATACGCTGATTTTATAAATAATTCTCCATATTATCA
chr01	1527653	chr01	0	ATGAGTTTTTGGAAGTTGTGCAAGTATTTTACTGCAAGTTTTTGAGATGAATTGAAGGCCAAGTGTGTCAATTGAGCTATCTCATAGTCCTTTGATGGTTT
chr01	1592664	chr01	0	CATAAACAAAATATTGAGCACAATTAATTAAGCAAGAAATAGGCTTTGCATATAAGATAAATAATCAAAATTTAACCATTGTACTACAATGGTTATCATTT
chr01	1592685	chr01	0	AATTAATTAAGCAAGAAATAGGCTTTGCATATAAGATAAATAATCAAAATTTAACCATTGTACTACAATGGTTATCATTTACACCAAAAACAGTTAAGCTG
chr01	1592697	chr01	0	AAGAAATAGGCTTTGCATATAAGATAAATAATCAAAATTTAACCATTGTACTACAATGGTTATCATTTACACCAAAAACAGTTAAGCTGTCAATCCAATGT
chr01	1592730	chr01	0	AAAATTTAACCATTGTACTACAATGGTTATCATTTACACCAAAAACAGTTAAGCTGTCAATCCAATGTATGCATACACAAACTTCTCCATAGGCCTAAATT
chr01	1671859	chr01	0	TCGAGCACCGAATTCCCTACAACGCTATCATCCAACACTGCTATTCAGTGCCACAGACCATCAGCAGAACTTTCAAACTCTTTCACCCCAACACTCAAAAT
chr01	1303899	chr01	1.34	CTTTGAATTGTTGCATTTGAGTCGAGTGTCTTTCGGAAGTAGTCTCTCTAAATTCACGAGGTAATGGTAAGGTCTACGTACATTCTATCCTCCCAGATCCC
chr01	1922890	chr01	1.34	TTTTAAAATATATGTCCTAAAAATGGGTTATTTACAAGAATAACCTTAAATGTGGATAATTTCAAACTTTTGACCTCGTTTGCTTTATGGACAAAATTTTT
chr01	1925356	chr01	1.34	CGTACCAAATGGCTTATAAGGTTTGATCATATTTGTGTTTTTTGATTATCCCCTTTTTGTTCTTGGAGTGTATGCTGCGTAGTTGGAGTCATTTTTCTTTT
chr01	2031516	chr01	1.34	AGGAATATGTTATATATTAGAATATTTTAAAATTATTTATCCACAAATTTAAAGTAATAATATAAATTTTACATAACATGTAAATAGTCAGATGATGAAAT
chr01	3521212	chr01	8.33	ATAGCATGATTAAACCTGTTTGATTGAATACGAAATTTTAGGAAGAAAAAAAGACTAACCTTTCCAAATGGAGAGACAATTTGTTGGAGAGCTGTAATTTT
chr01	3521213	chr01	8.33	TAGCATGATTAAACCTGTTTGATTGAATACGAAATTTTAGGAAGAAAAAAAGACTAACCTTTCCAAATGGAGAGACAATTTGTTGGAGAGCTGTAATTTTG
chr01	3521214	chr01	8.33	AGCATGATTAAACCTGTTTGATTGAATACGAAATTTTAGGAAGAAAAAAAGACTAACCTTTCCAAATGGAGAGACAATTTGTTGGAGAGCTGTAATTTTGT
chr01	3258602	chr01	8.41	GATTAATTAATGAATTAAATAAATCAAAAGACTTATTCATATATAGCAAGTGTTTAATCAAATATAATGGGAATAAGAAATTAATCTAAATGCTTATCATG
chr01	3258619	chr01	8.41	AATAAATCAAAAGACTTATTCATATATAGCAAGTGTTTAATCAAATATAATGGGAATAAGAAATTAATCTAAATGCTTATCATGAATATTTCCTAGCAAAT
chr01	3258622	chr01	8.41	AAATCAAAAGACTTATTCATATATAGCAAGTGTTTAATCAAATATAATGGGAATAAGAAATTAATCTAAATGCTTATCATGAATATTTCCTAGCAAATTAT
chr01	3258625	chr01	8.41	TCAAAAGACTTATTCATATATAGCAAGTGTTTAATCAAATATAATGGGAATAAGAAATTAATCTAAATGCTTATCATGAATATTTCCTAGCAAATTATTTC
chr01	3267418	chr01	8.41	ATATTATTAATATTATATAGTAACATATAAAGAAGAGCAACTCCACTCCCGATCTACTTTATATATCTTTGATAAATCCAATAGAAAAAAAAAACATTTTT
chr01	3372836	chr01	8.41	CATTCAAATTATCTATTTTTAATGGTTTTAACTTTTAAATTTTAATCAAAGTGTGGTTTGTTTTTTCTCAGGTTCGAAATGCTTGTTATCCATATTTTTTT
chr01	3972061	chr01	10.12	CCTCCCCTCTCATCCCTTACTCCTCAAAAGAAAAGATAGCAGAAATAAAATGCAGAGAGCGCGAATATGGATGGCGTGCTTTATGCTTTCCTTATTTTCAT
chr01	3972071	chr01	10.12	CATCCCTTACTCCTCAAAAGAAAAGATAGCAGAAATAAAATGCAGAGAGCGCGAATATGGATGGCGTGCTTTATGCTTTCCTTATTTTCATGTTTGACCTC
chr01	3972073	chr01	10.12	TCCCTTACTCCTCAAAAGAAAAGATAGCAGAAATAAAATGCAGAGAGCGCGAATATGGATGGCGTGCTTTATGCTTTCCTTATTTTCATGTTTGACCTCTA
chr01	3517969	chr01	10.39	ATATTATTTTAGTATAAAGTACAAAAATTCCATATATTTGGAGTCTAATTACATCCTATCTCAAAAGTTTTCTCAATTACTAAAATCGCAATTTTTTCATT
chr01	3518021	chr01	10.39	ATCCTATCTCAAAAGTTTTCTCAATTACTAAAATCGCAATTTTTTCATTGCTGTAGGATACATTTTTGATTGTCCGATACATTGCAAATGAGGGATGTATC
chr01	3518025	chr01	10.39	TATCTCAAAAGTTTTCTCAATTACTAAAATCGCAATTTTTTCATTGCTGTAGGATACATTTTTGATTGTCCGATACATTGCAAATGAGGGATGTATCCAAG
chr01	3509477	chr01	10.89	CTTAATTTATGTGAAGTTTATAATGGAAAACAAATAATGTAGTAATTATATGAAAGTTATATTGGTTATAACTGATTTTATATTGTAGATCAAATATTAGG
chr01	3509479	chr01	10.89	TAATTTATGTGAAGTTTATAATGGAAAACAAATAATGTAGTAATTATATGAAAGTTATATTGGTTATAACTGATTTTATATTGTAGATCAAATATTAGGTA
chr01	3509482	chr01	10.89	TTTATGTGAAGTTTATAATGGAAAACAAATAATGTAGTAATTATATGAAAGTTATATTGGTTATAACTGATTTTATATTGTAGATCAAATATTAGGTAATA
chr01	3509560	chr01	10.89	TGTAGATCAAATATTAGGTAATAATTTAATTCTTTATTAAAAAATTAAATTTTCTTATACTTTAGAGCAAACGACTTTTGAAGTGTATACCTTTAAGAAGT
chr01	3509589	chr01	10.89	TTCTTTATTAAAAAATTAAATTTTCTTATACTTTAGAGCAAACGACTTTTGAAGTGTATACCTTTAAGAAGTTTAGCAAGAGAAATTTGTAAAAGTTACTG
chr01	3509604	chr01	10.89	TTAAATTTTCTTATACTTTAGAGCAAACGACTTTTGAAGTGTATACCTTTAAGAAGTTTAGCAAGAGAAATTTGTAAAAGTTACTGATGAATTATAAAAAG
chr01	3509633	chr01	10.89	ACTTTTGAAGTGTATACCTTTAAGAAGTTTAGCAAGAGAAATTTGTAAAAGTTACTGATGAATTATAAAAAGCACAAATTATTATAATTATTTATATGGTG
chr01	3509639	chr01	10.89	GAAGTGTATACCTTTAAGAAGTTTAGCAAGAGAAATTTGTAAAAGTTACTGATGAATTATAAAAAGCACAAATTATTATAATTATTTATATGGTGAATAAT
chr01	4029487	chr01	12.47	AGACATGTCAGGTCAAAAATGCTTGCCAACCCATTGTACTATATTGCTTCATGAATCTCATCTCTAAGGCAGCTTTTGATCAAGATTTTCCATTTGTTCTG
chr01	4029490	chr01	12.47	CATGTCAGGTCAAAAATGCTTGCCAACCCATTGTACTATATTGCTTCATGAATCTCATCTCTAAGGCAGCTTTTGATCAAGATTTTCCATTTGTTCTGTGG
chr01	4029510	chr01	12.47	TGCCAACCCATTGTACTATATTGCTTCATGAATCTCATCTCTAAGGCAGCTTTTGATCAAGATTTTCCATTTGTTCTGTGGTATATTCAAATCTTTTAAAG
chr01	3763420	chr01	14.15	TAGTATGATGTTTTACACTTTGTGATTTTAGTTAGTTTGTGCTTTCTTCCATTGGATTTTATCATATTCTCACTAACAACAAGTTAATTCAAACTGTGCAG
chr01	3763449	chr01	14.15	AGTTAGTTTGTGCTTTCTTCCATTGGATTTTATCATATTCTCACTAACAACAAGTTAATTCAAACTGTGCAGGAAGTGAATTTCTGAAAAGGTTAAGTTTG
chr01	3763454	chr01	14.15	GTTTGTGCTTTCTTCCATTGGATTTTATCATATTCTCACTAACAACAAGTTAATTCAAACTGTGCAGGAAGTGAATTTCTGAAAAGGTTAAGTTTGCATTA
chr01	6200189	chr01	24.25	ATTTGCTAAAAATGTGTGATATTTGCTTCAAGGTTTTGTTCTGGTTGATGGAAAGGATTTAAGTTTGTAGTGTATATATATACACTTAGAAAAATTCACAA
chr01	6457473	chr01	24.25	AATTGTAAACATCCTCCATGGTACAAAGTTTGTCAGTGATTTTGTAAATCAGAGAAAGCAGTTGGTTTTTGGATACCCCATAAACAGAAGACTAGAAGAAT
chr01	6543524	chr01	24.25	ATTATAGAAATGTGTCATTCTTTTTGAGACTGACTAAAAAAGAAAGTAAGTCACATAAATTGGGACAGATGGAGTATCATTTTCACTCATTTAATAGGTTA
chr01	6669069	chr01	24.25	CGTTCACTTTTAATTGTCATGGTTTCCTTTTTTTAGAGTCAAACAATAAAAACATTGACTTACATTTTATGATGTATTTTTTCATCATATTAATATGCAAA
chr01	6669212	chr01	24.25	CCATATCGAATTAATATAATCTAATTTAACTTTAAAAATTAGTCCAATTAACTTTCGAAAAACGCAACATGACAATTAATAATAGACAGATGGAATAGTTA
chr01	6790544	chr01	24.25	GATTCAACTAGTGGGAAGTTGCATATATATCAGGTGTGTAAATAACTCCACCTCCCTTGGTTGTGGTTCCTAACATTATGCAAATAATACTGTAATTTTGT
chr01	7409630	chr01	25.26	TTTATTGAATTGTTGTGCTGAAACTCAATTTGTATGTGGAATTTGACAAATCAAGATTTTTGAGTTTTCTGAAGGTAAAAAGATTCAATTTTGGATTTTCA
chr01	7409641	chr01	25.26	GTTGTGCTGAAACTCAATTTGTATGTGGAATTTGACAAATCAAGATTTTTGAGTTTTCTGAAGGTAAAAAGATTCAATTTTGGATTTTCAAGAATCTAATG
chr01	7409643	chr01	25.26	TGTGCTGAAACTCAATTTGTATGTGGAATTTGACAAATCAAGATTTTTGAGTTTTCTGAAGGTAAAAAGATTCAATTTTGGATTTTCAAGAATCTAATGAA
chr01	7817647	chr01	26.46	TCAACATTTAAAATTTATGAGTTTCTATCGTAATTCTAAGTTAACGATATAGTAATAATTGGGTTCACACTGAAATATTTGTAGATATTTTTACTTAATGT
chr01	7817666	chr01	26.46	AGTTTCTATCGTAATTCTAAGTTAACGATATAGTAATAATTGGGTTCACACTGAAATATTTGTAGATATTTTTACTTAATGTGTATGTTGTTTTTTAAATT
chr01	7817669	chr01	26.46	TTCTATCGTAATTCTAAGTTAACGATATAGTAATAATTGGGTTCACACTGAAATATTTGTAGATATTTTTACTTAATGTGTATGTTGTTTTTTAAATTACT
chr01	8188709	chr01	26.47	TAATTTTTTTGTGTAATTTTTTATAATCTCTTTGTTTATAAAATCATGTTCGAATAAATCAAATAATTTTTTTAAATTATGTTGTATGCGAGGTTAGTGGA
chr01	8188739	chr01	26.47	TTTGTTTATAAAATCATGTTCGAATAAATCAAATAATTTTTTTAAATTATGTTGTATGCGAGGTTAGTGGATGAGATATATACGGGGAATTTTTATTCCAA
chr01	8188748	chr01	26.47	AAAATCATGTTCGAATAAATCAAATAATTTTTTTAAATTATGTTGTATGCGAGGTTAGTGGATGAGATATATACGGGGAATTTTTATTCCAAATGCAAATT
chr01	13334457	chr01	26.93	ACTGAGCATTAGTAAAACACTGCATGTGTAAAGGGAACACACCCCTGCACGAAGCATCCCGAGTTCATGTAGGGTAATTGCACCCCATTAGGGTGTGAGTG
chr01	13336234	chr01	26.93	GGGCCTCATAACCCTCATTCCTATGTCTAGATTTAGAGGCTTCCTCATTATATGTCATTTTGGCATTATCAACAAGCAATTTCAATTTATTAGTGGATGTT
chr01	13381387	chr01	26.93	ATCTGAACAACTCCTTAATTATATATATCAAGTTGAAGATAAACAATGCAGTTTCAAACTATACTCATGAAATTAGAAATTTCACTAAAGATAATCAAAAT
chr01	7875879	chr01	27.01	CTGGGAGAATTTTTTAGCCCCTTTCTTTATCTAAATTAGTCATACTGAACGAGAGAACATATTTGCTGAACGCGTATAAGATGCATGTAATGATAGCAACA
chr01	7905628	chr01	27.01	TTATTATATATCACATAATACTTGTATCAAATAAGTACTTAGTTATTGATGTTCTATTTACACTACAAAAATAATTAATCTTAGGATATTTATTACTTTGC
chr01	7905657	chr01	27.01	AATAAGTACTTAGTTATTGATGTTCTATTTACACTACAAAAATAATTAATCTTAGGATATTTATTACTTTGCAGTTAAAAGTGAATATCTCTTGTTAAATA
chr01	7925711	chr01	27.01	TTAACCCTTTCGAAAAGAGATATTTCAACCCCTAGAACCAAGCTATTCACAATTAGTAAAGGAAAAACATTTCATTGAATGGGTTGGGGAAATTCTACACA
chr01	7925788	chr01	27.01	AATGGGTTGGGGAAATTCTACACACTCATTAATCATTGAGTTGTCCAGAGTATAATTTTAGTTTAATAGCAAGAAACTGATTTGATTTTCCTGAAACTACA
chr01	7972743	chr01	27.01	AATTCAAACAATAATTAGTATACTAATTAGCTCATTATGCGTCACTACCCCAGTATGCTTTTCTCAATCATTTTTTTCTTTTTGTTGATAGAAGGAAAAAA
chr01	17556321	chr01	27.7	GACCTGACCTTAACACTTACGAAATTTTAAATTCCTTGGTAAAATCATACTCACAATGAAGAATGGTTTGAGTCTTAGCTCAAAAAATTTCTAGGGTGTTA
chr01	17556324	chr01	27.7	CTGACCTTAACACTTACGAAATTTTAAATTCCTTGGTAAAATCATACTCACAATGAAGAATGGTTTGAGTCTTAGCTCAAAAAATTTCTAGGGTGTTACAG
chr01	17556340	chr01	27.7	CGAAATTTTAAATTCCTTGGTAAAATCATACTCACAATGAAGAATGGTTTGAGTCTTAGCTCAAAAAATTTCTAGGGTGTTACAGTTTCAAAGTTTGCTTT
chr01	43448733	chr01	28.41	TCAAGAAAATACAATTATTTTTCCATGTCTTACCCTTAGCATTAAATACTCTTCTTCATATCATTTGTCAAGGCCCAATATTACACATTAATTAATAGGGA
chr01	43448741	chr01	28.41	ATACAATTATTTTTCCATGTCTTACCCTTAGCATTAAATACTCTTCTTCATATCATTTGTCAAGGCCCAATATTACACATTAATTAATAGGGATATTATGG
chr01	43448756	chr01	28.41	CATGTCTTACCCTTAGCATTAAATACTCTTCTTCATATCATTTGTCAAGGCCCAATATTACACATTAATTAATAGGGATATTATGGTAAAATAGTTGTATC
chr01	60226191	chr01	28.5	TAGATTGCCTCTCCCATATCTTTCATGTCAAAATTGTTAGAGATATATTTCTTAATATCATACAACAAACCAACATCATTAGTAGCAAGCAAGATGTCTCA
chr01	60332016	chr01	28.5	CATACTCTACAATTTACCCTCTAAAAGAAAATAACCACTAAAACTTATTAGTATTATAATAAAAACATCAATCCATCATGAATAAAAATAAAATTACTTTC
chr01	60526177	chr01	28.5	ACAAGTTCAGGAGAACTTTTATGGTTTGAGGGGAGCTCAAGTTAAAGGATGCAAAACTTCTTTCCGTTTTGAGATGTCCCAAAATATTTTAACACCATTCT
chr01	12026502	chr01	28.55	TATCTAAGTTTAATTAGTTAAATAGTGTGATATTTTTGAAGTTATCAATAATTTGAGGACGAAACTAATAATTTACGTTAAATTTAGAATTATTTTTAATT
chr01	13738741	chr01	28.55	ATTTCTTGATGCCCACGTCTCTTGCCCTTTTGACAACTCTTTAGTGTCAACTTTCTATATGACAGATTTAATACCATGAGATTAAGGGCATTTTGATATAT
chr01	16102672	chr01	28.55	TCTTTCCCAGTTAATTAATGGATACATTGAAAGAATTTGGGAAAATCATGGAATAAATAAAAAGTCATGTTAAAAAATGGAATTATCTTGGTACGATTTGA
chr01	16771971	chr01	28.55	AACTTCTAGTTTGATCAGGGAAACCACAGAAAATGAATCTTCCACTACACATGTTTCTAGCAATTCACATGGCATCATGAAATGATACAAGTCTCTGATAA
chr01	16771993	chr01	28.55	ACCACAGAAAATGAATCTTCCACTACACATGTTTCTAGCAATTCACATGGCATCATGAAATGATACAAGTCTCTGATAAGAATCTACAACGTACTAGAACG
chr01	16908181	chr01	28.55	CTGTAGCTTAACAATTATTCAGAGAAGTAATAATGTGCTTGAAAAATTCATCAACTATTGAAGAGAAGTGGATTGCAGACTATCAAGGCATGAGAACTAGG
chr01	17711439	chr01	28.55	CTTAAAGAAGGAATGATCAACCACCGGGGGAGAATTAAAACATGCAAGTTCACCCTAAAAATGATACATATTATTTTTCGAAGCATTGTTAAGCACATGAT
chr01	19067041	chr01	28.55	GTTCTGCTTAACCTGTAGCTAGCGCCTTTGGCTTCGCTACTGGATCAATAGATTACTTGATCACATTTTGAAGATTAGCGAAGCGGGAAAAGAAAGAGGGA
chr01	20723712	chr01	28.55	AAGTATGTGTCAAAATAATCAAGGTCTTCTTTTTGTCTAAAGCATTTGACGACAAGTCTTGCTAATAGTTTCATCAGCTTTCATTTTCCTTTTGAAGATGC
chr01	23369232	chr01	28.55	AAACTCTTGAACACACTTTATTTGTGAAATTAATGCATACTAAATACTATGACAATCAAGAATCAATGATAGGAGATAAAGGGAATTCGAAATCATAGAAT
chr01	27416016	chr01	28.55	ACGAACAATTGTCACATAAATCACATTAAGGTCCATATATTTATCACCATACAAAATCAAACAATGGAAGTGTTGGACATCAGGGCACATACAACTTTTAA
chr01	28903294	chr01	28.55	TAACTTTATATTTACTCTATCATTAGTCTGTCAATAACAATAATTACTTCTTAAGGTAAAATGAGAAAAACTATTTACTTTTATCTTAAAAATTTATAAAC
chr01	31078573	chr01	28.55	AATCATGTGCCCAGAGACTAGTATTTTCCTAAAAAAACATATGTATATATCTAACACAAAACGAGAAAAATGTAAAAATAAAATAAAATTGAGAGCGGAGG
chr01	31885665	chr01	28.55	TACACAACTTTTTGTGAGTCCTCATGGTTTGGAGACGTGCCACTTTTGTTTTTCTTATGATCATTCCTTCAACATATAACTATTCTCTTTTATTTAGTGAA
chr01	32207224	chr01	28.55	ATGCTCTAGAAGGGTCTCAGTTTCAGAAATTCTGTTTTTATGATCACACATGGTAGATGTGTACATTCACAATTTCACTTTACAAACAGAAATAACATTCT
chr01	32209205	chr01	28.55	GTATATAACTTTGAAATTTTTTATAATTTCCCCCATTCTGGGGGTTTTAATTTAAAAATAAAAAAACACTTGTGCAGTAAAATATGACATCGGGAATCATA
chr01	33226227	chr01	28.55	ATTTCATACAATTATTTTTTGTTGAAACAAATTGAAATTAAGAAAAAATGTAACTTCTTGATATAATAAATAATAGTATGTCTAATTTGAATTAATATATT
chr01	35872026	chr01	28.55	TAATTCTCACTACTGATGAACCAATTAAATTTCTCAAACCAGTGAACTTTGCGCATATGTGAAATCACAGCAACTGTCTTTTCCTGCATATTTATATGGAG
chr01	35872302	chr01	28.55	CAGCAAAGTGGTTATATATATTCAGAAATTATACTGTTTAGAAGAGTGCTATAGTACAGGATATTAAATTCAGTATTAAAGAAATAACAAAAATGCTTAGA
chr01	36012379	chr01	28.55	TTCTTCTTACCACTGGGCGGCTTTTTTTTTTATATAAGTAAAACTAATAACGAACCAAGAAGGTGTCAAAAGTAGTCTATATCTTTTGCAGAGAATGCTTA
chr01	37020468	chr01	28.55	AATTGCAACAGGAAAACAAACACTTCATATTTTGAGTACGAGGATGTCCCAACTGCCTATGCCACAGTTTCCAAAGAGCATTGGGTGAGATGATCTGCTAA
chr01	37674883	chr01	28.55	TCTTGCTCCTCTGTAAAGGATCAACGAAGATAAATTAAAAGCTTCAATTCGTAATGAAAGAGAGAAGGAGAAAAGAAAAGTAAATTTTCTGAACTTAGTTT
chr01	37883882	chr01	28.55	ATGATTCACAATTTAATCAGCTACTCAACGAAGACTCAAGCTTCAATTGGTAAATTAATATTTTACTTTTCCATGTATGAGGATTTTCATATGATAATGAC
chr01	42077370	chr01	28.55	TTCCAATACATAGGGGATGGAATTCCCATATTTCTATAACCTTTATAAAGCCATGTTATTCAATTTCTTTTAGATTTGCTCAAAATGGTCAAATGTCAACA
chr01	44428267	chr01	28.55	TTCTTAGTTATTATATTCTATAAGGTGACAGCAATGACGAAGTCAAGATTATTGTGTTCAAAATATGAATAAATAAACATACAAAGAAATTGAAGGGGGTC
chr01	45027198	chr01	28.55	GAAAGAAAGTTTGATTAAGACTAATTTTTTATCACACATCCAATGTATTTAGTAAATTGTTTCAGATGCATGACCACATCAACAATTATTCTTGTTATGGA
chr01	45669173	chr01	28.55	ATTAACAAATGTTTTCTAAAGAAAGATTGAAAATTTGTATATTTTAATTTATGGATGTAAAAAAGATAAATATTGAAACAAGTGAAAATTGAAATATTGGC
chr01	45920359	chr01	28.55	TTTCGTTTGTGAGATTTGGAGAATGGTGCCAATGAAAATGAATTGAAGAATATTTTTCCTTTGGAGCTTGAGCAACATTTGTCCTTCACTAATGTTTTATT
chr01	46526887	chr01	28.55	AAAAGTTAAAGAAAAGGAAGTACCTAAAGGCTCGAAAAAGTTAGGATAGCGGGTTTGCATGTCAAGATCGGTCTCCCAAGCTGCCTTCTCGACCAGATGTT
chr01	46596038	chr01	28.55	AAAGAAAACTTTTTTCTACCAGAAAATCAAGAATCAAAAGCTTTGAATTACGAAACTGTAAAAACAGATAGAGACTGATGAGTTTGAATAAATTGAGCATA
chr01	46663526	chr01	28.55	CTAAATTTTGAGTGTATATGAATTTATGTGACACAATTGGATCATTGAATATTCACACTTTACATCATCCTGATTAGTCAGAATATTCTAATATATCACAA
chr01	49038861	chr01	28.55	TTGTTTTGATGCCGATCCTTGTTTGATAGCTAGCTAGACAATTTTTTCCCGATTTGAATTTTGTATGTTGTAGTGACTAGTTGGCTTAGTTGTGAGCCGTC
chr01	50076945	chr01	28.55	TCGGTTTTTTATATTCTTGTGACACCCCTAGCTGTTAGTGGACTAAGCAATTACTTTCTAGTTGTTGTTTCTCATAGAAACGTGTTTTAGTAGTTCCTAGT
chr01	50078111	chr01	28.55	TTGATGAATTGCAAAGTTCATTGTTGATTCATGAGCAGAAAATGAATCGACAAACGATCGAGGAACAAGCTCTTCAAGTCTCATCCAACTACCACTCTTCA
chr01	52934638	chr01	28.55	TTTCAAAATAATCTGTTTGAAATACAAACAGTGAATGATCGAATTGTTTTGATTTTGTTGTATGTTGGATGCTTGGAATACAAAATAATTTGAAATCCTAT
chr01	53655838	chr01	28.55	AGAGATGAAGCGACCTAATGAAGCTGGAAAAGTTGATGACCCAAATTATTGCAAGTATCATAGACTTGTGAGTCACCCTCTTGATAAATCTTTTGTCTTGA
chr01	53712466	chr01	28.55	TTCACTACAATAGATCGAGTTTACTTTATGCCACTAGTCAAATTCAATTACCGGCATTTTCCTGAACATTCAAAATAAAATTATAAGTTAGTGAAATAAAT
chr01	54433845	chr01	28.55	AATAAATTATACTCGGCGTTACGGACTCAATGGAACCATTGAAAATGAATTTGAGGTCTCCTTGACCCGATATCTGTGAAAACCACAAAAAACTAACTCAA
chr01	56568872	chr01	28.55	AATTCTTTGAGGTGTCTTCTTAAATATTTAAAGATCAAACTAATTAAATTTAAAAAGACACTGTCTTAACATTGAATATCTTCTAAAGTGTAATAATCACT
chr01	43536660	chr01	28.82	AGCTTCAATTTAAAGCTCATTCTCTACCTTTTGATCTTAGAAAAAAGGTTATACTCTTTTCTTTTTTGTGTGTCAATTACAAGTTGTGTGTTTTTGAAGGT
chr01	43536661	chr01	28.82	GCTTCAATTTAAAGCTCATTCTCTACCTTTTGATCTTAGAAAAAAGGTTATACTCTTTTCTTTTTTGTGTGTCAATTACAAGTTGTGTGTTTTTGAAGGTA
chr01	43573987	chr01	28.82	ATCAACAACGCCTCCTCAATCTATTTCCTCAACTCTTTATCTTTAGATTAAGTGAAATCGTGATAAAGAAATGAATTAAGAATTTAACTTAATATATAGTT
chr01	16061186	chr01	28.96	TCAAACCACTAAAGTAGTATAGACTTGCCCATACTTGTATTTGTGTAAAATCAAAGTGATCTGAGTGATGTGACACTTGAATTCCTGCTATATCCCTCTAA
chr01	17764569	chr01	28.96	TCCAAAATTAATGCATGGAAAATAAATACAAAAAGACTTTCAATAACAATCTCATCAACTAGAATTCATGCGAAATATAATCATTAACAACAACTCAAGGT
chr01	19050122	chr01	28.96	GAGTGTACGCAGACCTTACCACTACCTCGTGGAGGTAGAGAGTTTGTTTCCGAAAGACCCTCTGTTCAAGTGTAGCAAGTCCAAGTACAAAGAGTAAGAAA
chr01	32165804	chr01	29.16	TCTAATATTCTCAGTTTACATATCTATTGTCCTAGAAATAATCTTTTATGTTTTGAGATCAATAGGATAACTAATTCGATTGATTTGAAGATATTAATTGA
chr01	32165813	chr01	29.16	CTCAGTTTACATATCTATTGTCCTAGAAATAATCTTTTATGTTTTGAGATCAATAGGATAACTAATTCGATTGATTTGAAGATATTAATTGAAAGCAATAT
chr01	32165818	chr01	29.16	TTTACATATCTATTGTCCTAGAAATAATCTTTTATGTTTTGAGATCAATAGGATAACTAATTCGATTGATTTGAAGATATTAATTGAAAGCAATATATAAA
chr01	62505600	chr01	29.41	TCCACTATGAGGACTTTTTAGTACTTCTTGAATAAGAAGATTCTATTATTTTCGATGGTTAATTATAAGACCTCTGATTAAGTGTGAGTCTGAATTTTATG
chr01	62505606	chr01	29.41	ATGAGGACTTTTTAGTACTTCTTGAATAAGAAGATTCTATTATTTTCGATGGTTAATTATAAGACCTCTGATTAAGTGTGAGTCTGAATTTTATGTATAGT
chr01	62505616	chr01	29.41	TTTAGTACTTCTTGAATAAGAAGATTCTATTATTTTCGATGGTTAATTATAAGACCTCTGATTAAGTGTGAGTCTGAATTTTATGTATAGTGAAAGTTGGA
chr01	61537109	chr01	30.16	TTTATCGATAACGACAAAATATAATCAATGAGTTGGAATCAGAACAACTAATACGTACTAGAACACGACAATTTTTAAGTCGCATCAAATAATTACAAGTC
chr01	61537112	chr01	30.16	ATCGATAACGACAAAATATAATCAATGAGTTGGAATCAGAACAACTAATACGTACTAGAACACGACAATTTTTAAGTCGCATCAAATAATTACAAGTCAAA
chr01	61537116	chr01	30.16	ATAACGACAAAATATAATCAATGAGTTGGAATCAGAACAACTAATACGTACTAGAACACGACAATTTTTAAGTCGCATCAAATAATTACAAGTCAAAATAG
chr01	59827609	chr01	30.32	CTTTTATGTGTTTTTTGGTTGTGGGGTTGATGGTTTGGGGTTTGATTTATTTATAAAGTTTTGATCTTTATGGTGAATGATAGATTTCTGTGCAAGTTTAA
chr01	59835920	chr01	30.32	GGCAAAGTTCAAAAATTTCATATATTTGAGGCTAATTACATCTTATTCTGGAAGTTTGCTCAATTAAAAAAATACTTATTTTTCATCGCCCGCGGATACAT
chr01	59838404	chr01	30.32	ACATCATCCACATACATCACCTTACTTAACTTGCACCTCAAGTATTGGTCTACATTATTAAAAATAGTTGTCCTAAATTACTTGTCAATTTATAAAATCAA
chr01	59882193	chr01	30.32	AAAACTTATTTACTAGATTTTGACATGACAAAACCTCCAAAGAAACTTGGCGGATAAATCCTTTGCTGAGTCATCACTTGAGGTGCATAGAAAGAGAAATG
chr01	59882208	chr01	30.32	GATTTTGACATGACAAAACCTCCAAAGAAACTTGGCGGATAAATCCTTTGCTGAGTCATCACTTGAGGTGCATAGAAAGAGAAATGAAAGTTTTTTTTCTC
chr01	60240557	chr01	30.32	GTTGACTTACTAGGGAAGACGGTTGATCAACTTTGGAGTGATTACAAGGCTAAATTTGGGGCATAACTTAAGAAATCCAAATTAAATCGAAAATGAGAAAC
chr01	60249410	chr01	30.32	TCTGAAATTAGCAACTACACCTACAAATATTCAATACAAAGCACAAATATCCTCTCGTAGGAGCGGTCCTGTTATTGTTTCCTCAGTTTTGCTGAAGTGGT
chr01	60453853	chr01	30.32	GATCTGGTTGATGTAAATACTTATGTGAATTGATTCGTGGAAGAAGGGATCTACTTGGTATCACTTAATTATGAAAATTCAAACTAAACTTGTAGACTCAA
chr01	60453872	chr01	30.32	CTTATGTGAATTGATTCGTGGAAGAAGGGATCTACTTGGTATCACTTAATTATGAAAATTCAAACTAAACTTGTAGACTCAACTATGTTTCCGCAATAGGT
chr01	60546042	chr01	30.32	TTTGAAGTTTATTGATTCCTTATCAAGTATCAATTTGTAAACACGCTAAATTGTTATGATATCGATTTATAAGTTATTGATCGTTGTTGATTTTGTTATCG
chr01	60546043	chr01	30.32	TTGAAGTTTATTGATTCCTTATCAAGTATCAATTTGTAAACACGCTAAATTGTTATGATATCGATTTATAAGTTATTGATCGTTGTTGATTTTGTTATCGA
chr01	60546054	chr01	30.32	TGATTCCTTATCAAGTATCAATTTGTAAACACGCTAAATTGTTATGATATCGATTTATAAGTTATTGATCGTTGTTGATTTTGTTATCGAATTTATTGTTA
chr01	60546062	chr01	30.32	TATCAAGTATCAATTTGTAAACACGCTAAATTGTTATGATATCGATTTATAAGTTATTGATCGTTGTTGATTTTGTTATCGAATTTATTGTTATACACACA
chr01	60546070	chr01	30.32	ATCAATTTGTAAACACGCTAAATTGTTATGATATCGATTTATAAGTTATTGATCGTTGTTGATTTTGTTATCGAATTTATTGTTATACACACATTTTTTTT
chr01	60733923	chr01	30.32	TGTTGAGTCGTTTTATCTTCATAATTGGAGCTATTATAAAGTATCATCGATATTTTGTTAAATTCAAAGGCAACTATTGTTGAAATTCGAAGCTTCAAAAT
chr01	60784709	chr01	30.32	TTTCAGTCTGACCTTGTGAATCAGAAGAGCAAATGCTGACGATTTACAATCTGCTGATCCACTGAGCCTTTTCATGTATTATTATCTGGATTTTTTTGGGA
chr01	60844090	chr01	30.32	ATTTAATTACTATCCTAATGTTTAGGATTTTGAAATGAATTAAAGTTATAACTATTAAATCCTTACTTATTCGTAAGATATAAAAGTCCTAATATTTAGTA
chr01	60844111	chr01	30.32	TTAGGATTTTGAAATGAATTAAAGTTATAACTATTAAATCCTTACTTATTCGTAAGATATAAAAGTCCTAATATTTAGTATTTTGAAATTGACTATAGTTT
chr01	60844112	chr01	30.32	TAGGATTTTGAAATGAATTAAAGTTATAACTATTAAATCCTTACTTATTCGTAAGATATAAAAGTCCTAATATTTAGTATTTTGAAATTGACTATAGTTTC
chr01	60985816	chr01	30.32	AATATCCTTCTCTTTAGAGGGTTTTCAACTCTCTCTAGTTTTAAGAAAAATTTGGGAAGTGGCAAAGGGGTAAAATATTGACAAATCATCCTTTAATTAAT
chr01	61066123	chr01	30.32	AATATTATCTTTAGTAGTACCATATCTATTATGGAGTAATTTTCTTTTGTGTTGGGGAAATGACAAATTTTGATATTTATATATAATAGTAGTATTATTTC
chr01	61067589	chr01	30.32	TGAGACCTGCATTGAAATTTGATTAATTTGGATTCGCGTCGTGTAGGGCTCCATTCTAATAAAAGCACTCCCTACCAATAATTTTTCTATATCCATGGCTC
chr01	61114999	chr01	30.32	CTCACCATCATATATTGAATGTTTTTTGTAAAGATATAATGATAACATTTAATTATTAAGAAATAATGAACATTATGTATAATGTATTTTTACAATGAATT
chr01	61115034	chr01	30.32	ATAATGATAACATTTAATTATTAAGAAATAATGAACATTATGTATAATGTATTTTTACAATGAATTTATTGAATTTTTTTCAATGAATCATTTAACAAAAG
chr01	61347200	chr01	30.32	ATAGTGGAAAATAAATTATAACTTTTCGGTATGTCATCTTCAATAATTCACTTAATATGGACTAGAGGGAGTACTATTTAAAAGATTATTTATCTTGATAA
chr01	61355723	chr01	30.32	TATGTTGACTTTCAAAATAAAATAAATACAGAAAAAAAAAATCATCATTCTTATATATTTTCTTCGTTTCATTTTTACTTGATCTTTATGCCAATTTTTTT
chr01	61482708	chr01	30.32	ACTAGATTGGATTCTTGAATTCGAACTTTGGAACAATTTTAAATGGATAAAGAATCAAGTGGAGCTCACTTTTTCGGTTGTCGTTCTGTGAAATTCTGTCA
chr01	61624797	chr01	30.32	CAGTTGTATGTTGATCTATTTATACAAAATTATTGACTAACTAATCACCATAATCAACCTATTCAACTAACTTAGCACTGAGTACACTTTGCATAAACTAA
chr01	61691762	chr01	30.32	TTGACTATACTTACATAAAGTAAGGAATGGACCATACATTAGTTATTGACTTATATAACATGGAGATACAAATTTTCTCACCACGTGCATATATTCAAGAC
chr01	61770440	chr01	30.32	GCTCTAAAAACTTTGATCATAAGAACAATTTTTTTATAGGTAATCTTATTGTTAGTTTTAACTAAATTAGTTTGGATTCATGAATTTATTTATGAGATGAG
chr01	62551333	chr01	30.92	GATCAACAATGCACGATATTTTTTGTTTAACTTGTTATATCTATTAAAATAGTGTTATTGCATAGTTAAACTATAAAATTATTTTCTTCATTTATGAATCT
chr01	62557496	chr01	30.92	GAAAGTGTTCCTATTAAAAAAAATTATATTTCTTACATTTGAATCAAGTCATTTAATTAAGAGCGGAAGGATCTCTTTCAACCAAGCAACACAAATATTTG
chr01	62585070	chr01	30.92	AAAAGACATAATTAATAAACGTGTCTTTTGCAATTGATCTCAACTAACATCCATGCCATTCAATATTGAGTGTGCATAAGTAGATACTTAAAGTTGTATAA
chr01	62594403	chr01	30.92	TTTGATTAGTGATATTTCAATATTTAGTCCATCAAATTTGTTATTCCACTATAATATTATAATGATAGAATAATTAAGTTATAATTAAGTTAATGAACATT
chr01	57382590	chr01	31.03	GTTATTAGTCATTCTCAGCATTTAATAGATTTCTATGTTCATGTTAGCAAGAAAGGCTGTCCAGGTGCCCTGGCTTATTATAATGTTTAAATATAAAAAAA
chr01	57382595	chr01	31.03	TAGTCATTCTCAGCATTTAATAGATTTCTATGTTCATGTTAGCAAGAAAGGCTGTCCAGGTGCCCTGGCTTATTATAATGTTTAAATATAAAAAAAAAAAT
chr01	57382606	chr01	31.03	AGCATTTAATAGATTTCTATGTTCATGTTAGCAAGAAAGGCTGTCCAGGTGCCCTGGCTTATTATAATGTTTAAATATAAAAAAAAAAATCAAGAAGAACA
chr01	57947231	chr01	31.77	AAGATCGACCAATGAGTTCACTAGAATCTAAAAGATGAAGAGATCATAGGGCAATGATATAGACACATTCAAATCCTCGATACTTTTCGTCATGTATTCCT
chr01	57951059	chr01	31.77	TATCATCAACATCATTTCTTAGTGCAAATTCCAAGACAAGTCGATAGACTCATAAGAGTTTCAAAGGCCTTATTTTTTATACCAAATTTATTTATAAGCTC
chr01	58059084	chr01	31.77	ATAAGTAATTTCTTATTTATTTTTAATATTTAGTAAGTTATCTGAAAAAATATTGTATATAATCTAGGCAAATACAATAAAAGATTGGCAAATACGACAAA
chr01	58290388	chr01	31.77	ATAGTTTAAATCTATTTTTGACTATTGATTAAAAATTGTTTTACGTTATATACGTCGATCAACGTTTATATTAGAGCTCTACAATAAAAAATAATAATTTA
chr01	58534380	chr01	31.77	CATCAGATTTCGGTATTTAATAAGAGCATTCTTTCTGTCATTTGTTTGTTTATTCTCAAGAATAGAGTCAAATATTAATGTGATTTGATTTTCTGATTGGC
chr01	58693893	chr01	31.77	TTTTGTCATTTTCAAAGGAGCAGATAGCTACGTTTTCGAATTTACAGAACATTAATCATATATCTCTTTTTATTTACATGGATAAGATGTAAAAAACGATA
chr01	62940571	chr01	32.01	TGTGACTAAACCACAAGCTTAGTTAGCTACATGGTTTAGTTAAACAGGAGGATAAAAAGTGAAGTTGGAATTTTGATGATATCTCAATTTAAATGTCTTTA
chr01	62981821	chr01	32.01	CATGTCATGTATTAAACTTTACTTACTCATGAAATATTTTTCATTTTTATCTAGATTAACAGTCACCGGAAATACATAGTATTAGAGATGACAAGAAATTA
chr01	62983571	chr01	32.01	TTAATTTTTTATTCCATGTTCGATATGAAGCTTGATTAATTTGAATTCGTATCGGATAGGGCTCATTCAGAAATAATAGTTCCTACCAAGCATTTTTCATA
chr01	62985527	chr01	32.01	TTCAAAACTCCTACTTTTTTTCATGTTACTTGTTTCTACATTACTTTCAATAGGGCATAATTAAGTTCTCAAGTGATATGTTAAAAATGACCCCTCATGTT
chr01	60049676	chr01	32.11	TCTGTAACAAATCACTCATAAAGATCAAACAACAATAATAATGTGCAATGTAATGAAGCGCAATGCCATATATAGTAATGCATGTTTGTCCTAACATACAC
chr01	60049752	chr01	32.11	AATGCATGTTTGTCCTAACATACACACCCGTTGAGACTCAAGCCGGGACCTATGAGGAACTCACAAGGTCCATGTATCTTTCAGAACCATTTCCCTTCGGT
chr01	60049759	chr01	32.11	GTTTGTCCTAACATACACACCCGTTGAGACTCAAGCCGGGACCTATGAGGAACTCACAAGGTCCATGTATCTTTCAGAACCATTTCCCTTCGGTATATCTC
chr01	61067546	chr01	32.16	GTATCAGTTGTGTATGATTTTTTTTAATATTCCAGATTATGTTTGAGACCTGCATTGAAATTTGATTAATTTGGATTCGCGTCGTGTAGGGCTCCATTCTA
chr01	61067549	chr01	32.16	TCAGTTGTGTATGATTTTTTTTAATATTCCAGATTATGTTTGAGACCTGCATTGAAATTTGATTAATTTGGATTCGCGTCGTGTAGGGCTCCATTCTAATA
chr01	61067559	chr01	32.16	ATGATTTTTTTTAATATTCCAGATTATGTTTGAGACCTGCATTGAAATTTGATTAATTTGGATTCGCGTCGTGTAGGGCTCCATTCTAATAAAAGCACTCC
chr01	64538855	chr01	37.19	TTAACTATGACTGTAAAAACCATACCAGAAAAGCGGAAGTGACTGACTGCGACAGTGTGACTTGCGGAGTTGAAATTTCAGAAAAAACTGAGGAGGTAGTA
chr01	64546453	chr01	37.19	GAGATTTTGTTATTTAATTTTTGGACCCTCTTCGTTAAATTCCTGGCTCCGCCACTGAGTGAATAAGGAAAGTACAGTAAAAAAGCACAGAAACAAAGCAA
chr01	64554495	chr01	37.19	ATAGACATATAGTAACTATATTCAACTTTTTAAGTGTATCATAACGTATAGTAAATGTATATCTCATGTATAAGTAAATTGCATTCAACCTTTTGAGTGTA
chr01	64561387	chr01	37.19	TGGGGGTTAGAATGATTCTTGGGAATGGTACAAACATATTTTATAGAATACAAGTGTTATACATAGAAATGCAGTCACATGAATACAATGTATTTCACTTG
chr01	64561438	chr01	37.19	AAGTGTTATACATAGAAATGCAGTCACATGAATACAATGTATTTCACTTGCGCGTGAATACATACATTATATTCCACTATTTTTTGAAACAAACTATCAAT
chr01	65377583	chr01	41.63	TGATTGAAAAGTCTACTTCAAAAAAAAGTTAAATAAGGATAAAATAGTAAATTTATTTAATTTCTTAATACACGTGAAATAAAAAATGGTGAGATATAAAT
chr01	65377584	chr01	41.63	GATTGAAAAGTCTACTTCAAAAAAAAGTTAAATAAGGATAAAATAGTAAATTTATTTAATTTCTTAATACACGTGAAATAAAAAATGGTGAGATATAAATA
chr01	65377596	chr01	41.63	TACTTCAAAAAAAAGTTAAATAAGGATAAAATAGTAAATTTATTTAATTTCTTAATACACGTGAAATAAAAAATGGTGAGATATAAATAGGAATAATGAGA
chr01	65377602	chr01	41.63	AAAAAAAAGTTAAATAAGGATAAAATAGTAAATTTATTTAATTTCTTAATACACGTGAAATAAAAAATGGTGAGATATAAATAGGAATAATGAGAGTATTA
chr01	65377636	chr01	41.63	TATTTAATTTCTTAATACACGTGAAATAAAAAATGGTGAGATATAAATAGGAATAATGAGAGTATTATTTTTTTTTTTCATTTTACTTTAAGCAAAATTTA
chr01	66370345	chr01	43.31	GGAGCTCTTGCCTAAAAGCGGTTAAACTTACTCCAGTCGGGGTAATCATAACAACTTTAAAAGCAAGAATATAAAACAAGAAAAGAATAAACATTGGATCT
chr01	66408156	chr01	43.31	TTATTCTTTTACATTAAAGATTGCATTTTTTATTTAAGTATTGGGATTTGGTTTGATACAGAGGTTTCTGTCATTTGCAAAGATGAATTGATTTCTAATTT
chr01	66408205	chr01	43.31	GGTTTGATACAGAGGTTTCTGTCATTTGCAAAGATGAATTGATTTCTAATTTAGTGGAGATTTTTTCTTCTGTTCTAGTCGTGATAGTTGAACTCTTGGAC
chr01	66408213	chr01	43.31	ACAGAGGTTTCTGTCATTTGCAAAGATGAATTGATTTCTAATTTAGTGGAGATTTTTTCTTCTGTTCTAGTCGTGATAGTTGAACTCTTGGACTAGTCTGT
chr01	66410520	chr01	43.31	ACTGGTGCTCAACCCCAACATTCTTCCCCTAAGAATCAGGAAGGACTAAATAAAAGAACTGTTTGTGATGACATCCCTCAAGATATTCCAGATATTGAACT
chr01	66415662	chr01	43.31	GCCTCAGATTATAACTATGACTTTTAATTTTGGACGTGCATAAATAGACATTTAAATTTATATAAAATTGAATAAATAAACATACGTGTCCTACGTATAAA
chr01	66415690	chr01	43.31	TTTGGACGTGCATAAATAGACATTTAAATTTATATAAAATTGAATAAATAAACATACGTGTCCTACGTATAAAATTTTGTATCTTGTAAAAAATAAATAAA
chr01	66415694	chr01	43.31	GACGTGCATAAATAGACATTTAAATTTATATAAAATTGAATAAATAAACATACGTGTCCTACGTATAAAATTTTGTATCTTGTAAAAAATAAATAAATCTA
chr01	66442225	chr01	43.31	TGTGTATTGTGACATTCCTAGTGTCTTTTTCTTTTAATTTAAAAGAAACTTGTAACATATCAATATAATATCATAAGTAAAGTCGGGAAGAAGTTGATAAA
chr01	66442327	chr01	43.31	GTTAAAAAAGATGGGAATGTAGTGATAAACTACGTCTACAAGATACTAATAAATTCTGTCTATGAGAGATTTGGTATATAAGCTCAGTTGAGTACTTCCTC
chr01	66442333	chr01	43.31	AAAGATGGGAATGTAGTGATAAACTACGTCTACAAGATACTAATAAATTCTGTCTATGAGAGATTTGGTATATAAGCTCAGTTGAGTACTTCCTCTTGTCA
chr01	64173119	chr01	44.24	AATACATATGCTATTATTATTTGTAATTAAGTTTAATTAGAATTATGATAATTTGGTCACAATAACATTTTACACTACTATTTAAAAGTAGTAATATTTTG
chr01	64173146	chr01	44.24	TAAGTTTAATTAGAATTATGATAATTTGGTCACAATAACATTTTACACTACTATTTAAAAGTAGTAATATTTTGTTTGTGCCAATTTATATGATACTCCTT
chr01	64173164	chr01	44.24	TGATAATTTGGTCACAATAACATTTTACACTACTATTTAAAAGTAGTAATATTTTGTTTGTGCCAATTTATATGATACTCCTTCCGTTCTTTTTTATATGT
chr01	64228587	chr01	44.81	GATGACTGCTGTGCTGATGTAATATTCACCTTTTATTCCGAGCCGAACTACATCCATTTCTCTCGCCTCCTTCTAAATTAATTTGTTTCTTCTTTTTCTTT
chr01	64228597	chr01	44.81	GTGCTGATGTAATATTCACCTTTTATTCCGAGCCGAACTACATCCATTTCTCTCGCCTCCTTCTAAATTAATTTGTTTCTTCTTTTTCTTTTTGGGTATAA
chr01	64228598	chr01	44.81	TGCTGATGTAATATTCACCTTTTATTCCGAGCCGAACTACATCCATTTCTCTCGCCTCCTTCTAAATTAATTTGTTTCTTCTTTTTCTTTTTGGGTATAAA
chr01	66962099	chr01	48.52	TTATCTCATAATATATAGATGTAAAATCTCAAGTAACTTGATCATCGAAGATTAAAATCACAAATGAAATTAATGTTTGAACCGTGATAGATAGTCGTTTT
chr01	67012092	chr01	48.52	CTTTTAGAATTGAATTAAGTTCAAAATCTATTTTTTTAGCATGGTATCATAGTCAAATCCACCAGATCTTCTTATATGATCGTGAATAGGGATGACAAAAT
chr01	67012093	chr01	48.52	TTTTAGAATTGAATTAAGTTCAAAATCTATTTTTTTAGCATGGTATCATAGTCAAATCCACCAGATCTTCTTATATGATCGTGAATAGGGATGACAAAATG
chr01	67224918	chr01	50.2	AATACATGTAGAGCTACTTTGAAAATGTAGGGTAAAAGAAGAAATATAATCCCTATGTCCCTAATTACTTGTCCATTTTTACTTTTTTATTTGTCCCTCCT
chr01	67256679	chr01	50.2	TGAGCATTGAACAAACTAAATGAAATGACGTGTCATCGCAGTGAAAACAGCGTTCACAAGAAGCACTAGAAATTAAGCACATGAATAAAACACCAAAATTT
chr01	67261111	chr01	50.2	TCCGTTTCCAGGAATGAAGCATCTTGATGTGGCTGGTGGAACAGGTGATGTTTTTGACATTGAACATTGATCCTGCTATGTGATTATGTAAAGCTTGGATT
chr01	67261125	chr01	50.2	TGAAGCATCTTGATGTGGCTGGTGGAACAGGTGATGTTTTTGACATTGAACATTGATCCTGCTATGTGATTATGTAAAGCTTGGATTAAAAGAAGGAAAGC
chr01	67054306	chr01	50.89	TATCACAGGTAACTATAATTTTCTTCCAGCTTCTTTAAGTTATATGTTATTGATCGTTCACATATGTAGTAGTTCTCTGTTCTAAGTTTCTGTTTTGTCTT
chr01	67054311	chr01	50.89	CAGGTAACTATAATTTTCTTCCAGCTTCTTTAAGTTATATGTTATTGATCGTTCACATATGTAGTAGTTCTCTGTTCTAAGTTTCTGTTTTGTCTTTGTTA
chr01	67079883	chr01	50.89	GGTGCAATTTTAATTATTCGCCCTTTTTCTCATAATTTGCGCTCACTTTACTCATATTAGATAAATTGATATCGCAAAATAATCAACAATTAGAAGTGTAT
chr01	72233567	chr01	61.49	GATTCTTGGCCAATATATTTACCAAATTATATATAGCCAAACATCACTTCTCAAGTTTTTCTCAAGTATTCTTGAGGTCAAACATGTCCTTAAAGAGTTGT
chr01	72233571	chr01	61.49	CTTGGCCAATATATTTACCAAATTATATATAGCCAAACATCACTTCTCAAGTTTTTCTCAAGTATTCTTGAGGTCAAACATGTCCTTAAAGAGTTGTCAAT
chr01	72233598	chr01	61.49	TATAGCCAAACATCACTTCTCAAGTTTTTCTCAAGTATTCTTGAGGTCAAACATGTCCTTAAAGAGTTGTCAATAGTAATAATAACATGTTTTGAAACCAA
chr01	72298714	chr01	62.44	GTAGATAGACAGTTATTATATGACAAAAACAGCAAAATAGACATTGAGGCTTAATACATCAACGGACTTAAATTTATAGTAAATTTCATTTAGATATTCAA
chr01	72379098	chr01	62.44	GTAAAAGTCGTGCTTGAAGGCAAACTTTCAAAATATGTGTTGTCGTTTTTAAAAATGGATTAGCAAAAAAGGGTTGAACTTGTCTCTCAATAATTTTTATC
chr01	72534926	chr01	62.44	TCATTCCATTTGTGTACAACTTTGGTTATACATACAATAATTAAGAAAGGGCAAACTTTTGTTCGAAGATTTGCCAACATTAGTTACAAATAAAATAATTT
chr01	72534939	chr01	62.44	GTACAACTTTGGTTATACATACAATAATTAAGAAAGGGCAAACTTTTGTTCGAAGATTTGCCAACATTAGTTACAAATAAAATAATTTGAAAAAAATTAAT
chr01	73758241	chr01	65.62	TAAATTACAAGACAACATAATTTTTTTAAACAAAATTGATGGAAGGTGTTACAACAAACAGGACACTGAACAGGTCTCAATTTATTATTCAGCTAGATCAG
chr01	73758251	chr01	65.62	GACAACATAATTTTTTTAAACAAAATTGATGGAAGGTGTTACAACAAACAGGACACTGAACAGGTCTCAATTTATTATTCAGCTAGATCAGCTACTTTACC
chr01	73758252	chr01	65.62	ACAACATAATTTTTTTAAACAAAATTGATGGAAGGTGTTACAACAAACAGGACACTGAACAGGTCTCAATTTATTATTCAGCTAGATCAGCTACTTTACCA
chr01	75274971	chr01	69.77	TCAATCTGTCCAATCTGTTTAAAATAACTCGCTCATTCATTCGCTCAATCATTTTCAACTCAACTCATTAATAACATTGTGTTAGGCTCCTTTGTGATTAA
chr01	75275032	chr01	69.77	AACTCATTAATAACATTGTGTTAGGCTCCTTTGTGATTAATTCGGATTTGAGTCCTTAGTATAGGGTGAAATTTCCTACCAAAGATAACTTCGTAGTTACT
chr01	75326302	chr01	69.77	GATGGCATAGCAATATGCCTAACATCTTATGGAGTGTTAGTTGGCTCTATTGGGCTACAAATAGATGAACTTTAAGAGTGACAATACAACAGATCTGGTTC
chr01	75342293	chr01	69.77	GCTGTGAGATGGTAATTGGCTTAGTCCCTCTTTTTACATAAGTTTTGATCGAGGATAGCAAACCTTGATCTTATTTATGCATAGGGATGTATTTCAGACAA
chr01	75435231	chr01	69.77	AAATAACTGCTTAAACATATCTAAGATTCTCTTTCGTTTTTCAAGCATAGAAATGTTTCTACAAAAATAAAAACTCAGATAAAAAATAAATACTCATAGGT
chr01	75532260	chr01	69.77	GCCTTAGAAATTATTTGTATCCTTTTACGAGTAGCAGAAATATTAGGGTTAGAATCTAGTGTGAATGCGCCCTCTTTTTTATAACTTTGATAGATATTCCA
chr01	77284197	chr01	71.66	TTTCTAACAATAGATTTGTAATAATCCTTTTCTTTACATTGAAATCTTTGAAAATTTTGGCGACAGTATTAGGCAAATTTTCGAATATGTGACTAGACTAT
chr01	77284200	chr01	71.66	CTAACAATAGATTTGTAATAATCCTTTTCTTTACATTGAAATCTTTGAAAATTTTGGCGACAGTATTAGGCAAATTTTCGAATATGTGACTAGACTATAAT
chr01	77284203	chr01	71.66	ACAATAGATTTGTAATAATCCTTTTCTTTACATTGAAATCTTTGAAAATTTTGGCGACAGTATTAGGCAAATTTTCGAATATGTGACTAGACTATAATATT
chr01	77618284	chr01	72.03	AATGTCTAGTATTTGATAGTAGGTATTAAAAGTACGTAACTACCTTTAGAAGTAAAATTCGATTAAATGACGAATTGTTTTGCCTAGAACACGTGCTGCTA
chr01	77618285	chr01	72.03	ATGTCTAGTATTTGATAGTAGGTATTAAAAGTACGTAACTACCTTTAGAAGTAAAATTCGATTAAATGACGAATTGTTTTGCCTAGAACACGTGCTGCTAA
chr01	77618316	chr01	72.03	TACGTAACTACCTTTAGAAGTAAAATTCGATTAAATGACGAATTGTTTTGCCTAGAACACGTGCTGCTAATACTGTTTTATGGATTTTGTGTTTAATTTTG
chr01	77618317	chr01	72.03	ACGTAACTACCTTTAGAAGTAAAATTCGATTAAATGACGAATTGTTTTGCCTAGAACACGTGCTGCTAATACTGTTTTATGGATTTTGTGTTTAATTTTGA
chr01	77094485	chr01	72.63	TTAGGAGTTAGGAAAAGGTATGTAAAGAATGTCTATCTATTGAATCAGTTGGTAGAAGAATAATCCATCAAAATTGTAGATAGGTTCTTGCTAACCAAGAA
chr01	77171185	chr01	72.63	CTTGTTATGGGGTTTTCAGGTATTTATGGATTTTTGTAATGCATTTCGTCCTACTGTATTTATCTCCTGGAAAAGATAGAGTTATTCATAGAATGAAGTAT
chr01	77171196	chr01	72.63	GTTTTCAGGTATTTATGGATTTTTGTAATGCATTTCGTCCTACTGTATTTATCTCCTGGAAAAGATAGAGTTATTCATAGAATGAAGTATGAATTGTAGTA
chr01	78139554	chr01	73.19	GAACAATCATTATTTTCATCAGTCTTAAAATAAGTGTCATCTTAAAAATTCAGAATGAAAATAATACTTATGTGTTTTCAGCTATACATTTATTCTCTAAC
chr01	78139559	chr01	73.19	ATCATTATTTTCATCAGTCTTAAAATAAGTGTCATCTTAAAAATTCAGAATGAAAATAATACTTATGTGTTTTCAGCTATACATTTATTCTCTAACTATTT
chr01	78139560	chr01	73.19	TCATTATTTTCATCAGTCTTAAAATAAGTGTCATCTTAAAAATTCAGAATGAAAATAATACTTATGTGTTTTCAGCTATACATTTATTCTCTAACTATTTA
chr01	76460854	chr01	73.41	ATGCCCTTGCAAAGATTTGATTATCTTACCTTTATGTTCACTCCGTGAATGTTATGTGCGTTTATATGATTTTCCTCATACAATATGAAAATAAATTATAT
chr01	76925022	chr01	73.41	AGGGAAGAACAAAAAGGATATGTCTTAGAAGTTGGAATGATTCTCCTACTAATAACGTCAACAGAAATATGGAAAACAAAAGTCAAAGAAACAAATTTTCA
chr01	76925024	chr01	73.41	GGAAGAACAAAAAGGATATGTCTTAGAAGTTGGAATGATTCTCCTACTAATAACGTCAACAGAAATATGGAAAACAAAAGTCAAAGAAACAAATTTTCATC
chr01	77494698	chr01	73.66	AAACATATTGCAGGTGATGAGCTTCTCTCAGACTCATTTCCCTACAAAGAAATCCAGAATGGAATGCTTTGGGAAGTTCAAGGGAAGGTAGGGTCTCCAGT
chr01	77494701	chr01	73.66	CATATTGCAGGTGATGAGCTTCTCTCAGACTCATTTCCCTACAAAGAAATCCAGAATGGAATGCTTTGGGAAGTTCAAGGGAAGGTAGGGTCTCCAGTTAA
chr01	77494704	chr01	73.66	ATTGCAGGTGATGAGCTTCTCTCAGACTCATTTCCCTACAAAGAAATCCAGAATGGAATGCTTTGGGAAGTTCAAGGGAAGGTAGGGTCTCCAGTTAATTA
chr01	77528440	chr01	74.03	ACTGCAAAAGAAATTTAAATAGATAGACGAACTAGGCAACTGTAAAACTAGGCATTCATATGCTTCCACTACTTAGATTCGGAATATTCTAGATTAATAGA
chr01	77554949	chr01	74.03	TTGAATAACAAAATACCAAAACATAGAGATTTTTTCCTATCAACTAGCAGTTTTTGTTTCTTTTTCATTTATCTTTCCGATTCTTTGAATGAATGGACAGA
chr01	77569373	chr01	74.03	GAACTTTAAACATACCATTCTCTTATTCCGAACTATAAAAAATATCCTAACAAATATGAATTACAGAGAATACTGCTGTAGTAGTTCAATTGGAGTTACAA
chr01	77625222	chr01	74.03	TTAGTTTTGGGAAAATAAGTTGCTTAATTTGGCTGTTTGAATTGAGAATTTGATCCAATTCTAACCACTTCCAAATCCCCTAATTTCATCCTCTTTAAGAT
chr01	77826911	chr01	74.03	ATACTTACTACGTTACCAGATTAAGCAGTTATTATAGGTCTACTTGGTCTCTTCCCTTCCATGGCATCTTTCTTCCTCCGACAAGTTGAACAAAGGAATGG
chr01	77832556	chr01	74.03	ATAACAGATGAATAATTATTTATAATGTAATGAATAAATAAAAATGGACAAAAGGAATAGTTGCTGAAAAAAATCTGTAAAATGAGTTAGTTGATATAATA
chr01	77849945	chr01	74.03	CTAGGGAAGTTGGTTCCCTTTTGCTTTCCACAATATAATGGATATTATAACTTAGTTGATCTTATATCCCTTTTAAAGAAAATATAGGTTGAAATTTATGA
chr01	77860262	chr01	74.03	GATGAAGAAGAAGAAGAGTTTCCAGTAACAGAAGGGATGGATAATTCTAGCAAGCGTCAGTTACGTAAGGCCACTTTTAAAGATGAGGATGAGGAATTCAC
chr01	77875432	chr01	74.03	TCATATATATTCAAATGAAGTTTGCTTAGTCGATATTCGTGAAAGGAGGATAATCGGTGGAATTTACTCGGGTGAAATTCTGATAATTAACTTGATCTGCT
chr01	77950205	chr01	74.03	TTTACCATTATTTAGTGTTCTCTTGAAGTCAAGTTTACAATAAATGAACATAAATTAATTTATTTTTATTAACTAAATTGACCAATGAACATGAATTAATC
chr01	78074204	chr01	74.03	TATTTATTTATTTAACTAATTGAACTTAAATACACCCCGATCTTATAACATGAGTAAAATACACTCATAAAATCTAGCCAAGTTTATGAGTGTTTTCAACA
chr01	78108120	chr01	74.03	TTATGTTATAAAACATTATTTGTTTTCCTTTCAAGAAAGTGTGTATCTCAGGATACTCCAATTCAATTCTGATTTCTGCCACTAGTGGACCATATGGTATA
chr01	78121553	chr01	74.03	TGTTTTTAAGACATATTGACCAAATACAAGCAAAATCTTTATCAAAATTAAATTTTTAAATGCATTTAAAAAAAAAATTTTAAAATTTTGGTCAAAAAGGC
chr01	78137952	chr01	74.03	AGATGATTTAATTTAGAAGAAGCTGGTGTTCCCTGCTCATTCAGTCTCTTTAATCCAAGAGTTATACTTTCAGGGTTTATGGCGGTGAGAGTTGGAATACG
chr01	78183873	chr01	74.03	CCAGCACTGAGAAGAAAAGCCCCCATACTGCAGTGCCGCAAAACATAAATTAGCTAAGCAAGATAATCTCTTTATTCCATGAAAAAAAGAAAAAGGCAAAG
chr01	78351295	chr01	74.03	TATTTTCTTATTGGTCAAACCAAAAACTGAACCGTTAAGGACCAAAACTGGTAAATCGAAAATCGATAAAAAATTTCTTATTAATTTAACGTATTTAGAAA
chr01	78351300	chr01	74.03	TCTTATTGGTCAAACCAAAAACTGAACCGTTAAGGACCAAAACTGGTAAATCGAAAATCGATAAAAAATTTCTTATTAATTTAACGTATTTAGAAACCAAT
chr01	78415046	chr01	74.03	ACTTAATAAAGTATTATTAATCAAGAACCTCAATGCAAACAATTCACATACGCAACACTAAATTAGCTCGAAAGTTGCACAAAAATGGATGTAGTAAAGAC
chr01	78477395	chr01	74.03	ATCTTTGTTTAAAATATACCAATTTTTCTCCATAAGGCAAATAATTAGAATATTTTAAGACAGTAAACATGTTCAATTGATCAAAAGTCATGCCTTATAAG
chr01	78494975	chr01	74.03	TGAAGAAATGATATTGATGATTTATTTTTATTTTTTTCTATAGATCATATTCAACCAGATGACTTTTGTTAGAACTTGTCATTCTTTTTAAAGAATTATTT
chr01	78495010	chr01	74.03	TTCTATAGATCATATTCAACCAGATGACTTTTGTTAGAACTTGTCATTCTTTTTAAAGAATTATTTATTAGGAGTTGTTTGTTAAATTAAGAGTACTTACG
chr01	78495020	chr01	74.03	CATATTCAACCAGATGACTTTTGTTAGAACTTGTCATTCTTTTTAAAGAATTATTTATTAGGAGTTGTTTGTTAAATTAAGAGTACTTACGCTTTAGTCAG
chr01	78555191	chr01	74.03	TGTATACCTCCTTTGCAGTATTATATCTGAGTTTTTTAACAAATATGTTCGTTAAAAAGTTCCAGCAAAACTCAAACCACATAATTTTACGGCACGGGGAA
chr01	78125624	chr01	74.82	TTCATTTTCATTTTTCACCACAGAAGAATGATAAACTAGAATTTGTTACTATGTCAAGTCCATATTAATTGCTAATTCTCTTTCCTTAATCTATAAAAGTA
chr01	78125633	chr01	74.82	ATTTTTCACCACAGAAGAATGATAAACTAGAATTTGTTACTATGTCAAGTCCATATTAATTGCTAATTCTCTTTCCTTAATCTATAAAAGTAGAATAGGCA
chr01	78125634	chr01	74.82	TTTTTCACCACAGAAGAATGATAAACTAGAATTTGTTACTATGTCAAGTCCATATTAATTGCTAATTCTCTTTCCTTAATCTATAAAAGTAGAATAGGCAT
chr01	78831807	chr01	75.63	TATAATTACATACTAAGATTTTATGTAATGCTATATTTTTTCAAGTTGAAGACGGAAACAATAGCATTGGATCAAGACAGACGCCATTGAAGGAAGAAAAA
chr01	78841087	chr01	75.63	CCAATATTATTATATTTTGGGTGCCATCGAAATAGACCACAAATCAACATTCCAAATGCATGGTGCAATTGTGACAAAAAAGACTAAAAGACAAAATAATG
chr01	78979751	chr01	75.63	GTCTTCTCAATGCAAGTACCCCATTCAATTCCATTATATACTATCCCATTTTGTATGACACTTTTTGACTTGACATAATATTTAAGAAAAAAAGGAAAATT
chr01	79018374	chr01	75.63	ACATCTTCTAATCTTGTATTTTTTACAAGAATCTTTCCTATTCATATAAGTAGATGTAGATCCAGAATTTAGGGCAATGAAGCACCTTTAGTGCAAAAGTT
chr01	79018378	chr01	75.63	CTTCTAATCTTGTATTTTTTACAAGAATCTTTCCTATTCATATAAGTAGATGTAGATCCAGAATTTAGGGCAATGAAGCACCTTTAGTGCAAAAGTTTGAT
chr01	79018380	chr01	75.63	TCTAATCTTGTATTTTTTACAAGAATCTTTCCTATTCATATAAGTAGATGTAGATCCAGAATTTAGGGCAATGAAGCACCTTTAGTGCAAAAGTTTGATGC
chr01	79270649	chr01	77.07	TGATTTCCAATTACAAGTATGAAGAAAGTTCAAGAAAGACTGTTTCACTATTCAAGAAATTCAAGATCAATTACAAGTATGAAGAAAGTTCAAGAAGGACT
chr01	79277143	chr01	77.07	ATCAACCAAAGTAACCAAAAATTTGGGGAAAATAATAAATATTTCCAAATCAAAGCAAACAAAACAAGAAGACCAATACAGAGGACTGAATCATGCTTCAC
chr01	79465016	chr01	77.07	GTCATTTTTGTCAGATCTGAGTATACCTCTTTCTTCTTCATTTCACTTAGTTATGGTCCCTGTCTTCTTTTTTTGAGTACAATGGGGTGTTATAAATGAAC
chr01	79498953	chr01	77.07	TGCAGAAAACAATTCAAGAATCAAGAATTCTCATTGTTGTTTTGTCAAAAGACTATACCTCTTCAGAGAGGTGCCTTGATGAACTTGTGTTTATACTTGAG
chr01	79684255	chr01	77.07	ATTTAACATATGTCGGTGATTGTATTGTCCCAAAACTACGCATTATCGGAGAGGTGTCCTTACGAGCCTGTCATAATTTTGGAGAAGCGCTCCCAAATAAT
chr01	79691055	chr01	77.07	GGCTGTCTTTTCCATGAGCTGCTATCTTTTCAGCTTGCTGATCGACGTCCACCTGCTGAGGTTAGTAGTTTGGCTTTTTTATGATTGATGGAAAAGGTTCT
chr01	79768693	chr01	77.07	TCTTAGGGTTTATGTTTGAGAATTTGACTTCTTGATGTTTCCTGATTGGAATTCACAATGTAATTGATATTGTTTTGCCTTACTGGTTTATTATGTTCAAG
chr01	79772592	chr01	77.07	GCAAATAGAGATGATTTTCCATGAACCCCACCCAAAAATCTCTACATAAAGGGACTTCTTGTATAGATGGGGAACCATCTTTCACTCTACATACAAGAAAT
chr01	79772598	chr01	77.07	AGAGATGATTTTCCATGAACCCCACCCAAAAATCTCTACATAAAGGGACTTCTTGTATAGATGGGGAACCATCTTTCACTCTACATACAAGAAATATGCAA
chr01	79824841	chr01	77.07	TTGATGTGAAAAAGTCATCATAATATCTGAATTATTAAATAAAAGTTACTCTCTGCATTTCAAATTAATTGAATTGTTGAAGTGTTTTGCATCCTTTAAGA
chr01	79839748	chr01	77.07	ATGTAGATGTCAATATTTATCTATGTGTGCATCAATTAAGAGTCTGTTTGGTTTGACTTATTTTTATCATTTAGCTTAAAAATAAATGGTTATAATCATTT
chr01	79914454	chr01	77.07	TCAAAGTTCTTTTATGTATGAAGTTCTTATTAGGTGTTAATTAAAGAATAAAAATTATAGCACATTGAATTGTCAAGATGATTTGGAAGGTTGCAGAATAC
chr01	79965861	chr01	77.07	ATTATAAATAATGTTCATAGCTTTTTAATAATAAAATATTATTCATTGTATTTTTACTAAAAACACTTGATATATGATGATAAGAGAATAAACTACATATG
chr01	79993038	chr01	77.07	TAAAAAATGAAAAAAAATAATTGTCTTTTTCTTGATATTTCAAAAGTGACCAGTAAAAATAAAAAATCTATTTTAGGAATTAGTGACAAATAAAAGGGAAC
chr01	79994068	chr01	77.07	TAAAATGTAAATTTTTAGTTGAATTTATTGTTATAAAAAAGTTATTATTGGAAATTATGAAGTAGAGAAAAAAAATCAATAAATTTAGTTAAATAACAAAA
chr01	80031521	chr01	77.07	ATTTACCAATTTTAAATAGTTAGAGGATATATAAGCCCTTTTATTTTTAATTTGTCTATCTGTTTTCTTCTCCGACGATTACAATTGCCCAGCAATTATTC
chr01	80104074	chr01	77.07	ACAAAAAGTGCTAAGCTTTTTCTTTCTATTTATCTAACTAGGTTATGTTTAGTGCTTTGACAAGGAAGCAACAAGTGTGAGGGAAAATGCGGTTACATTTT
chr01	80218558	chr01	77.07	CATTTTTAATATGAAATAGTATATATTCACTGTATATTTGACTAGAAAATATAATTATTTTTGTCTGAGTCTTCAAATGTGTAAATACCTTTATCAAGATA
chr01	80221938	chr01	77.07	TTTCTGTCTATCCTCACTTGTTGCTAGAGCGCATTTAAACACCACACAAATTTTTGAATTCGACCTCTCTTCATTTCCCCAATTTTTTTATTCATTTCCTT
chr01	80100858	chr01	77.6	TACAGCGATCGATGGATAACAGATATTGCCAAACGTCACCCTCCAAAATGAGGATTGTAATTCATCCGTCACAATTTCACTCTGTAATAGTTGTGTAGTAG
chr01	80192047	chr01	77.6	ATCTGAAGCTTATGTTTTTCTGTTTCTCTTATCCCTTTATGACTCAGAAGGGATTCTGACCCAAACAATTTAGGGTCTTTATGTCTCATCAGTCATCGCTA
chr01	80192066	chr01	77.6	CTGTTTCTCTTATCCCTTTATGACTCAGAAGGGATTCTGACCCAAACAATTTAGGGTCTTTATGTCTCATCAGTCATCGCTATTGCTTGAATGGTCATAAT
chr01	80188386	chr01	78.95	TCTCACTCCAACATTGATTCTTTTAAAGAATTCATTTAACAAGTTAACTTCCACTTCTTCAATGTAGTAATCATAAGTTTAGGAATGTATTACTAAATTTT
chr01	80188395	chr01	78.95	AACATTGATTCTTTTAAAGAATTCATTTAACAAGTTAACTTCCACTTCTTCAATGTAGTAATCATAAGTTTAGGAATGTATTACTAAATTTTAGCAAAATC
chr01	80188396	chr01	78.95	ACATTGATTCTTTTAAAGAATTCATTTAACAAGTTAACTTCCACTTCTTCAATGTAGTAATCATAAGTTTAGGAATGTATTACTAAATTTTAGCAAAATCA
chr01	81739321	chr01	82.42	GCTCCCACCCTTTTGCTCCCTTGCTGACTCGAACTCGCAACCTTCGGGTTGGAAGCGAGGGGTGTTTACCATCCGAGCAACTCCCTCTCATCGTTAATTAA
chr01	81739326	chr01	82.42	CACCCTTTTGCTCCCTTGCTGACTCGAACTCGCAACCTTCGGGTTGGAAGCGAGGGGTGTTTACCATCCGAGCAACTCCCTCTCATCGTTAATTAACTTTG
chr01	81739360	chr01	82.42	ACCTTCGGGTTGGAAGCGAGGGGTGTTTACCATCCGAGCAACTCCCTCTCATCGTTAATTAACTTTGTGTTCACTTTACCTTCTTTTTAAAAAAAATTATT
chr01	81779445	chr01	82.5	TAAAATCGGGAAGGTCCAAGATATTAGCAAGATTACCTGCTGTCTAAGACTTCTGAATATTTATCCTCAACCACTTCATGATCATACACTTCCATGATCTC
chr01	81779452	chr01	82.5	GGGAAGGTCCAAGATATTAGCAAGATTACCTGCTGTCTAAGACTTCTGAATATTTATCCTCAACCACTTCATGATCATACACTTCCATGATCTCAGTGTTT
chr01	81779476	chr01	82.5	ATTACCTGCTGTCTAAGACTTCTGAATATTTATCCTCAACCACTTCATGATCATACACTTCCATGATCTCAGTGTTTTCTACATCTTCTTTTCTTTCTTCT
chr01	82360440	chr01	82.63	TGGTACATCCAATTCAAGCACTACTATAGAAGAATTACTATTTCTACTCCAAGCAGAAAGTGTCCATTACTATCTCTATGTCATGGTTCAGGTCACAAGCT
chr01	82360456	chr01	82.63	AGCACTACTATAGAAGAATTACTATTTCTACTCCAAGCAGAAAGTGTCCATTACTATCTCTATGTCATGGTTCAGGTCACAAGCTTCATAGACTGAGATAG
chr01	82360463	chr01	82.63	CTATAGAAGAATTACTATTTCTACTCCAAGCAGAAAGTGTCCATTACTATCTCTATGTCATGGTTCAGGTCACAAGCTTCATAGACTGAGATAGAAATCGC
chr01	82269437	chr01	83.86	TTATGTCAGTATTGCAGAATTCAGGGCCGAGACATGAAGAAGAAGCTCATGCGGGAATTTCAGAGAATGCCACGGAATTAACTCTTGAAATTGAAAACGAA
chr01	82312770	chr01	83.86	ATTTGACCCTTAACCGATTAGTATTTAAATTTATATAAAATTGAACAAGTAGACATACGTTTTATATTACATAATACAAATTAGTTTAAGTGTTTCACATG
chr01	82773121	chr01	83.86	TTGTTTCTTCTTCCATAAATCTCTTAATTTTAGATAACGTAAATCACATCTTTATGACATTTATATTTTAACATATAAAAATTGAAAATTTGGGATAAAAA
chr01	81981598	chr01	84.15	CCATGTGGCTTAGTACATAACACAACAAAGTGCAAAGTAAAAGGCCTATATGGGCAATACAAACTAGTTATGATTATAGTTTTTGTCGTGTTAGTACACTT
chr01	81981599	chr01	84.15	CATGTGGCTTAGTACATAACACAACAAAGTGCAAAGTAAAAGGCCTATATGGGCAATACAAACTAGTTATGATTATAGTTTTTGTCGTGTTAGTACACTTA
chr01	81981603	chr01	84.15	TGGCTTAGTACATAACACAACAAAGTGCAAAGTAAAAGGCCTATATGGGCAATACAAACTAGTTATGATTATAGTTTTTGTCGTGTTAGTACACTTACAGT
chr01	82611819	chr01	84.79	ATTAGCAAACCAAATTTAATTTGGAAATTAGAAGTTCCAAAATCTTGCATTTCGAATGTACCAATTCGACGATCTGGAAATTATCAACCTTCTATTTGGGA
chr01	82611828	chr01	84.79	CCAAATTTAATTTGGAAATTAGAAGTTCCAAAATCTTGCATTTCGAATGTACCAATTCGACGATCTGGAAATTATCAACCTTCTATTTGGGACTATAATCA
chr01	82611832	chr01	84.79	ATTTAATTTGGAAATTAGAAGTTCCAAAATCTTGCATTTCGAATGTACCAATTCGACGATCTGGAAATTATCAACCTTCTATTTGGGACTATAATCATATT
chr01	82838357	chr01	84.97	TCAGTTGGACTCAGGTTTTTATGCTTATTTATCTTCTTTTTTTCTCTAACGTGTTCATGGGCATTGAGACATTTTTATTACTTCACTTTCGAACTAGAAAG
chr01	83044377	chr01	84.97	AGTCTGAGGTAAGCTAACAGAAATTGAAAAGGAGATTCCAAGAAAATTATTTTTAACCGAAGAGGCATATCACAGCACAACAAAGAAAGCGAGAGATAGAG
chr01	83133959	chr01	84.97	GGAATAATGATCATTTTGCCTATCTATACCCAAGATTTTGATGCATCAACTATACTTAAAAGTTATACTTTTTCCAACTAAAATACAAAGCATTGTCAATA
chr01	83134135	chr01	84.97	CACATAATTTAAACACCCACTATCATTCATTAATTAGTTTCTTTTTCTTTCTATCCTTTTTCTTTCGTGTGCTTTTTCTCATACCATTAACATTATAATAT
chr01	83244088	chr01	84.97	TAAATATTTTGAAACTATTATTTTTTACCACATGAACATTTCTATTAATTATTTTCAGTAGAAACTAATTAGTTTGATCAATAGGAGAACGATTATGGATT
chr01	83299422	chr01	84.97	TTACAAATCCAAATTTTATGGAGGAAATGACGATTTTTCATCTATTGAGTAACCAATAATATAAAAATATATTTACAACTTTAAGCTTTTAAATTTCACAT
chr01	83315457	chr01	84.97	AAATACTGGGGGTGTAAGATTAAAAGTCAATCCAATAATAATAATTGCATAAAGATGTAAAATCACCTGAACAATTCCAGTTTGGTCTCTAAGGTTGACGA
chr01	83422191	chr01	84.97	ATTTCACTCCGTCTTAGAGCTCTTGTAGCTTTTATTTGAATATACTCTTTCTCTTTATGAAAAGACCTCAAATCCAATGTTGGTTCTCACAGGTGAAGAAC
chr01	83651997	chr01	84.97	CTAATTGTAACGACGCGTTTTCTCATGCATTATATTAGTAAATATAGTATGTCTAATTGCTCTAACTGTGAAATTGTAATTACCCCATGATTTGATATAAA
chr01	83665917	chr01	84.97	TTTGATCTTTCTGAGTCCGGTCAATCGAAGAAGTATGTAAATTAGCTAACAATCTTTATCCATGTTGTAGTTCCTTTCAAAAGACTTCTATTTTTGTTTTC
chr01	83742226	chr01	84.97	CTTAATCTCAATTTGGGGGTTTGTTTTTACTTATTTTTAATCTTCATGATTTTAATTCTACTTTGAAATTGCTAAATTGGGGTTTTTGATATATTTAATTT
chr01	83760062	chr01	84.97	TCTCACACGAGATCACTATATGAGTAGTGAAGAAGTATTCAAAAGTTTAGTTGGTTGTTATGAAGTTGACCAACGGAAAGCATGGGAGGGAAAAAACAAAG
chr01	83866781	chr01	84.97	TACCAAATATACCTTATTCAAAAGCCTTAATTTATCAATGGATTTACTTATAGATATGACATTATAAATATTTTATATTATATATGATCAATATACTTTAA
chr01	83982718	chr01	84.97	ACTTCGGTTGTTGACAAAACATGACTATGTAATTTCTTTGTAGGTTATAAATGTGTAGCTATTTTCATAATATTGGTCTTTCTTCAGTTGGGAGAGTGAAG
chr01	83292488	chr01	85.13	AGTATAATATGATTGGGACATTTCTTAAAAAGTGAAAGTCTAATTCTTTATGATATAAATATATGTAAGTTGAAGTTGATCAAACTATAATAACCGATTAA
chr01	83292489	chr01	85.13	GTATAATATGATTGGGACATTTCTTAAAAAGTGAAAGTCTAATTCTTTATGATATAAATATATGTAAGTTGAAGTTGATCAAACTATAATAACCGATTAAC
chr01	83292494	chr01	85.13	ATATGATTGGGACATTTCTTAAAAAGTGAAAGTCTAATTCTTTATGATATAAATATATGTAAGTTGAAGTTGATCAAACTATAATAACCGATTAACCGTAC
chr01	84420001	chr01	87.32	TTGATATATATATTTTTTAATCATCTATGAATAATATTAATTGAAATTTTGAATATGTATATTTTAATTTAAAAATAATAAAAATTTAATCAAAACTATTA
chr01	84420010	chr01	87.32	ATATTTTTTAATCATCTATGAATAATATTAATTGAAATTTTGAATATGTATATTTTAATTTAAAAATAATAAAAATTTAATCAAAACTATTATATTAGATA
chr01	84420022	chr01	87.32	CATCTATGAATAATATTAATTGAAATTTTGAATATGTATATTTTAATTTAAAAATAATAAAAATTTAATCAAAACTATTATATTAGATATTTAAAATAATT
chr01	84420023	chr01	87.32	ATCTATGAATAATATTAATTGAAATTTTGAATATGTATATTTTAATTTAAAAATAATAAAAATTTAATCAAAACTATTATATTAGATATTTAAAATAATTT
chr01	88150476	chr01	94.31	GGTGCAAACACCTCAATAGAAAATAAAAATAATGACGAGAGATTGTATATCAAAATATTAATATAGGTAAAATATTGAAAAATCCCTCTCAATTAACGTTT
chr01	88371604	chr01	94.31	AAAAGTACCTGCATATACGTCAGCTGATCATAGCTCAAAGCAAGCTTTCTTACATCAGGATTTGATCCATCCTGCCAAAGGGAAGTAGAACGAAAAGTGGG
chr01	88386020	chr01	94.31	CAATGCAAAACTGTCAGGCCAACCGATCAAGGAGATAACAGTGATTAATGAACCTTTGCGATTCATAAGTTTTTTCGTTTAATCACCATAAGTTATACTTA
chr01	88603334	chr01	94.31	AAGTAAATTATTATTTTATCTATTTTAATTTGTTTGTTTGATTTTGACTTAATACGAGTTTAAAAAGGTTAAAAAGATTTTTGAATCTTATGATTTTAAAC
chr01	87233736	chr01	97.38	CGTGATCGAAAGTCCTAAAAGAGAATAATTGTTATTGCGTACATGCCTCAACGCTTGATCCAAAAGTAGTTGTACAATTAAGTTGTAATGGGTCATCAAGA
chr01	87233746	chr01	97.38	AGTCCTAAAAGAGAATAATTGTTATTGCGTACATGCCTCAACGCTTGATCCAAAAGTAGTTGTACAATTAAGTTGTAATGGGTCATCAAGAATCTTTAAAA
chr01	87269639	chr01	97.38	CAAATTTAAGTCTGGAAATGAAAAAATTCCTATAAGGAGCAGCGCCTATAGAAATGTTTGAATCTAAATTTAGTTAAACCCTAATACAGATACCATGCATT
chr01	85226117	chr01	98.96	TCATGGCCTTCTCCTGAGTTCTCAAAAGAACCTATGTCGCTCTATCTTCGTAGTCTTGATTTTGCTATCGGAAGCTCTGGAAAAGTCAGAATAGGAGAGTA
chr01	85342009	chr01	98.96	ATGCAGATACAATCATTCCAGATTTGGTTATATCGACTTAAATATGTTTTGAAAACGAAAAAATAATTAGATCTTTATATGATTTGCAGAATGAGCTGTAT
chr01	85533015	chr01	98.96	TGATTTCATCTCTTGATTTCATATTGTGATTTTATACCACATAACCAAACGCCTACTAAATAAGATCAGTTTAAAAAATTAAAAAATACGTTTATGTGATA
chr01	85608103	chr01	98.96	TCAAATTGTGTACCCTCGTGAAAAATTTGTCCAAAGTACCACAAAAAGATAACTATTCGTCCAATTGAGTCTTCATCATTGTTTATTATTAAAGCCGGTTG
chr01	85627013	chr01	98.96	CAAGCCTGTTCTGTTGGAATCTTATACCTGGTGCTTTAATTTGAATTTCCTGGTTTAATAATATTCATAATGAAAAGTAGTGTTCAACTGATGAACATCAT
chr01	85924463	chr01	98.96	TGCTCCCACCAAAAGCAATCATCTTAAAAAACACGCACGTCATCCCCTCTACATATATATTTAATATTATCACACTAAAAACAATAATTCTATGTACTAGT
chr01	85924686	chr01	98.96	TCCAATAACATATTGAAGTTCGACTACATTTAGATGGCAGGTTGCAAGACCTAGAACACAAAACTTTCAATAAGATTCTTTTCATATTCAAAACTCCGACC
chr01	85943978	chr01	98.96	GATTTTTAAAGTAATTTGTGTTTTTCTTCCTTCGCACTGGGAGTTCAGGCGCAAAACTCTTGCAATGAAACAAACTTGTCACTGAGGCTTCCTAACGATTT
chr01	88145935	chr01	108.8	AAAACCAATTTGTGACAAACATTAAATTTAGCCAAATGAAATTATTATATGGAAAAATGGAACTGTTGGTGAGAATGATCCACATGGAATTTTAGGCTCTT
chr01	88145937	chr01	108.8	AACCAATTTGTGACAAACATTAAATTTAGCCAAATGAAATTATTATATGGAAAAATGGAACTGTTGGTGAGAATGATCCACATGGAATTTTAGGCTCTTTG
chr01	88145938	chr01	108.8	ACCAATTTGTGACAAACATTAAATTTAGCCAAATGAAATTATTATATGGAAAAATGGAACTGTTGGTGAGAATGATCCACATGGAATTTTAGGCTCTTTGT
chr02	5793056	chr02	0	CATTTCAAGTCTTAGAAAGTTTTATAAAAGAAAAGTGGAAATCTAGACTTGTCTCATTAGCCATCTATTACAATCGAAGTCTCAATATAGGGTTACATCCC
chr02	7283221	chr02	1.88	CAAGCAAAAGATATGTAGACATGGGCAATAATTTATCATCATCAAAAAGGAGGGAAATGTTGTATTTTGGGATTTTGATGATTTAACAAGCTATAAAGAAA
chr02	5913385	chr02	2.44	TCTAATACACTCTACCAAGCGACCCGTAAGATTTCACAGGTTTCAACATTCGTAGGCATTCGGGAGGCTAGAACTCTCCTAGAAGAGATTCTCTTTCTTTT
chr02	1781402	chr02	2.6	AACTAAAAATACAAAATTTCTATGAACATTATGAAATGCATATTTGACCAATATGTTAATATTATAAATATAATGTCATAAAATTATTTAAAACATTTGAC
chr02	6877814	chr02	2.6	GTATACTGTCTTTTCGATTTTAAAAGTAGATGATCTATCTTTTTTAAATTGAAAATTGACATTTTGTGAATGATCAATTTACTAAAATGACAATTATTTGC
chr02	12095732	chr02	2.94	TGGCCCACATATATCTCTATTGTTACAAAAGTGACTCACATATACCCTTTTCATCTAACGGAAGTGAAAAAATAATAATATTATATAAATTATTTTTGATT
chr02	9278932	chr02	3.51	CTTAGAATTTTGACTAAAGTCAAACTTAGGACTTATCTTGTAAGTTAAAACGTCTAATCACATAGACTCACCCTAAAAGCCTCGGGAGTCCTGTTGACTAT
chr02	1331348	chr02	3.64	GTTATTTTCTTTTTGTCCTTTGCCTGACGAAAAAGGAGATACTATCCACAGTGTCTTAACTTTATTTTCATGCCTCATAACAGTTCCAGTATTCAATATGC
chr02	4837022	chr02	3.64	AGCTAAGGTTATGTAAAATAAACAAACTGTGGTTCAGCCCTTCTCTAGACCCCATGCAGGTTAGAGCACTGGACTGCCCTCTTTTTTTCCCAGATTCAATG
chr02	5164678	chr02	3.65	AAAGTCATTCCCTGTTTAATGAAGGCAGTTCATTTCTTATCTATTCAAGCACAAAGTTATCTTGTGATTGCTTGAGTTCATTCTTCTAGCTATACAAGAGA
chr02	4888202	chr02	3.65	CTAATGAAAAGCCCTGTGCACCTATATGCAAGAAAATGTTAATGTTTAGTCTCAAGGAAAACGTCTCTCAAATATTTCCTTTCTTGGCTTGACCAATAATT
chr02	7466670	chr02	3.65	TCATATCGCGGCTTCAGATATATGTTCGAAACTTGACGTTGTATAGACTCTTTGGCATCATAAAAGTATGTTGTTTTATAATTTGTATTCCCTTCATGTAT
chr02	2708626	chr02	3.66	GATTTGGTTTCTCAAGATACCAAACTTTGAAGGCTTTATTATATTTGTGATCATATTCATAGGTCCAATTTTTTATATGAAGCACATTCTTCAATTGTGGC
chr02	8362971	chr02	3.75	TAATTTTAAAATTAAAGTAGAATTCACTGTTGGATAAAGTTATGGACTTACGTTTTTTTAATCATATTTATGTATGTTATGTTGAAATTTGACATAAGAGT
chr02	18102965	chr02	3.98	TAACACATGTAGTTCTCTAGCTCAATAACTTTTATTGAAATGGCTTAGCTAGAAAGACAAACTATTAATAGGTTCCCATGGATAATATGTGTTTTCCTTAC
chr02	17215405	chr02	4.11	AATAAGTTACAAGAAACTAATGGTCATATGAGTTATAACAAAATAATCACTACAAGAGTTACAAGAACTAATGGTCATATAAGTTACAAGAATCAATAGTC
chr02	17215402	chr02	4.11	TTAAATAAGTTACAAGAAACTAATGGTCATATGAGTTATAACAAAATAATCACTACAAGAGTTACAAGAACTAATGGTCATATAAGTTACAAGAATCAATA
chr02	11315928	chr02	4.87	TAAATAAATTTATACTACAGTAAAAATTAAACTAAAACAAATTTCAATTGGCGTTATTACAAGTCATATGAACTTTTATTCATTGAAAATAGTGAAATGTT
chr02	11315942	chr02	4.87	CTACAGTAAAAATTAAACTAAAACAAATTTCAATTGGCGTTATTACAAGTCATATGAACTTTTATTCATTGAAAATAGTGAAATGTTAAGAAATAGTAATT
chr02	11315958	chr02	4.87	ACTAAAACAAATTTCAATTGGCGTTATTACAAGTCATATGAACTTTTATTCATTGAAAATAGTGAAATGTTAAGAAATAGTAATTCAGTAAAACAAAAGAG
chr02	15942951	chr02	4.94	TTGTTTCCTTTTTCCAGACGTCTAACCATTCCTAAGAATATTTAGTTTTTCTGTTATTAGGTTTCCTTTAACTTGATCCATGATTTATGTTCTGACATTTC
chr02	1327462	chr02	5	CTCACAAATATAGGTTTTATCAGTACAAATCCAGATATTCATAGATAAAACGTATCAACTAGTATTGACGTGAAAGTTGAAGTTGTATTAGAAAATACGGC
chr02	12105492	chr02	5.17	TTCATAAAGCATTCATAAATCCTTAATCAAATTCATGATCATAGTTCATAATTTCATAAGCATTGTTCATAATTTAAGTTCATAAATAGGCATAGGCATGG
chr02	15202480	chr02	5.39	TTTCATCTAAATAGTTTAAGAAAAATATTTTTTTGAATAAATACATATATAAAGTTTGTTTATATTTTAGGCCTCGAATTAAAATTTTGCTTAGGCCCCCA
chr02	11848753	chr02	5.5	GAAGTAAATACAAATTATGAATTTGATGATAGTGTCAATAGTAAAAATGATCACCTTGCTTCGAGTAAATAAATAATTTCATATTTTTGTTCTTTTGTTTT
chr02	12587040	chr02	5.5	TTGAAGGATATTTTCAAGTAGATTTGGAGTTGGGTTTTTGATTTTGAGCATTGTGGATCATTGTAAAGACTTGGATTGCAATACCCAGATTGTGGACAGCC
chr02	17146777	chr02	5.54	CCCGACTTATTCACGATTCCATTGTTGAAGAAATATTCCGACCTATTCACCGTCCACATAGATCTGAAATAGTCAAACAGTTCTTGTCTCAACACAGGGTC
chr02	17146781	chr02	5.54	ACTTATTCACGATTCCATTGTTGAAGAAATATTCCGACCTATTCACCGTCCACATAGATCTGAAATAGTCAAACAGTTCTTGTCTCAACACAGGGTCAAAT
chr02	6882509	chr02	5.63	TTATCTTCCAAGATTGTCATTTAAGTTTCTTCAAGAACATTATTCTTCCAGGTATGTAAGCTTTCATAGTGTTGGGTTCGTTCCTCCTCAAGCCAATCATG
chr02	6899178	chr02	5.69	GGGCTGCTTCCAAGTTTTAATGGTTCATGATCCCTCACATTATCTTTGCCCGCTTTACCTGTAGCAGTGGACCTAAAATAAATTCTGTGGAAGATGAGATT
chr02	9105057	chr02	5.92	AAGCACTTAAGATATTTTCCCACTTCAATTAATCTCTTTCGAGCATCAATCGAAGATCTAAACAAGGATTAAGTTTGCAACCTTAACCCATAAATTAACCT
chr02	17388914	chr02	6.05	CCACAAAAGAAATCATAAAAGGATGTTTTTGTACTGAGTGATTAATATATACGAACTGAGTGAATATACCAAGTGGATATAGATATGAACTCTGTTATGTA
chr02	17541542	chr02	6.22	GCTTATTAGCAATAAATTCTTTATTTTCTTAATCATTTTTACATTGTTCTCCGTGAGATTTGACCCGATTAATAGTTGTAAAAATTATATTCAACGAGCGA
chr02	17931239	chr02	6.4	TTTTACTTCAATTGGCATGCCTTGTAACAAATGAAATGTCATGGCAATGTCTAAAACTTCTAAAGGTACAACTGCTATAAGCCAAAAGTCTTTCTTTCTGT
chr02	15771866	chr02	6.4	ATGAAAAAATTATTGTTTCTCAATCCTTAAATGTTAAGGGGTAAAAGTGAAATTGACTTTTCTTTATTTCAAAATTTTGCAGAAGTAAATACATGGTCCTT
chr02	17426919	chr02	6.43	CTCTAATTCTTTTTCGACCTGCATATACCTTGCCTAACTCATTACGTACGACCAAGCTCTCATACATCCTCACTAATACACTCTCACACTTCCTATTCACA
chr02	17243841	chr02	6.43	TAGTGCCTTCATTTCAGTTCTCCAATTCAACAGCAAAAGTCCTCCTTCTCGCTGGTTTGCCTTTTTGGTAATTACTATTGTATGTGAAGGTATATTGTTTT
chr02	15288472	chr02	6.44	TCTTATTTATTTTAGTTGTTCAACACTTCTTACTCTTGTTCTAGTAAAAAAGTTTGCCTAAAAAACTTACTCTCCTTCCCAGAAAGAATAACAAATTCGAA
chr02	17214289	chr02	6.49	CACCATTTTAGATTTCACGTTCCTTAAAAAATTAGGTAAGTTTACTATTGCATTATTATTTAGTGTTCTCTTGAAGTCAAGTTTTCAATAAATGAACATAA
chr02	17496144	chr02	6.69	AAACCTAACACTAACAGAAGTTTTTGCCGCACGAAAAAATTCATATTTTGATTGTTCTGGTGTCACTTGTCTTTTTTCAATTTTTGATGTTGCATAGTTCA
chr02	12789954	chr02	6.72	CGGACAAGGATAAAGAAGGCTCGAGGTCCATTGCAAGTACTACTCATGAGGCATCCATTTTAGAGCAGTCCCAACTAGTAGGTGATTAGACCAGTGGTAAG
chr02	10046028	chr02	6.74	AGACAATATCTATCTTAAGAAAGTTGTTTTCACATTTATTTGATGAATTTAGAGGTCATATACCACAACTAATGCAATTAACATCCGAATGAATGTAATTC
chr02	19894105	chr02	6.81	AATATTTGAAATTCACATTGTAATAAAAAGTTAATAAGTTTTGAGAGATTATCATAATTTAGAAAATGATATGAAATTTAATGAGATGAATTGAATTTGAG
chr02	14550682	chr02	7.16	TTCATGTTAGGGAGTGTTCAAATTTCATTGAATTGTAAGATTCTCAACATCTGTAAATCACACTTGAGTATTTAAGAAGAGAAGAAACGAAAATAATAAAA
chr02	13556047	chr02	7.22	TTCATTAACCCGCATGTGTTGACTTGAGAAATCGAGAATTTGCACTGATTCTGATACAAGAAAGAGGAAGGTGTTGTGTTTTTGGACTAAGTTACGTTGTT
chr02	17176325	chr02	7.71	ACCTCTTTTAATTTGATCACTTCAGTGTTAATGAAATATGCATATAATATCGGAAATCATTCTATTAAATTCACTTATCATGGTAATGTGCAGATTCTGTG
chr02	15147083	chr02	7.71	TTTATGACTAGTATTACACTACTAACTTATTTATCAAGCAAGAATCGATTCAGAATCAAATATGACACTAGGTATCAATTACATTTCTAAATTGGGGTGTG
chr02	11745921	chr02	8.37	GGAGGAATGCAAACTTGATAAAATCTGAGTAATCAATAACCTTCGTCGCGCCGTGACGTTAATTTGTGCGTTACTTGGGAGGCAACCCATGATTGTAAATG
chr02	12995193	chr02	8.37	AGTTTCTTCTTTTCTATTGCTGATAAGGAGTACTCTAGCAAATGCAGAATGAGTTTGTTCATTCATCTCTGTAGGCCTAGAAGACTTTTTAAGCACCCCCT
chr02	13804887	chr02	8.37	GCCTCTTCTGCTTTGGGCAACTTCCTAGAGCACTCTCTTGCAGCTCCAATAATTTTTCCCTCCCTTCATTCCCATGTGAATATCCTTATAGTCGAGGTCCT
chr02	13923618	chr02	8.37	AATCACCATAACGAATCTTTTCTCACATAAGCATGATAAAATTCTAAATTAATACTCGCTACAATTAGAGGTGAACCTGAACCAACCAACACACTCATAAT
chr02	14687135	chr02	8.63	TCTTCCAAAGTGTAAATTTTCCATTCAGCCTGACCATCGATCTGCGGGTGAAAAGCTATGCTTAGTTTAACTTAAGTACCCAGTCCTTTCTAAAATGATGT
chr02	20199335	chr02	8.89	TGGCAGAATTGCTAGATCAAAAATTCAAAAATGAAGTTTTTATTTAGCCAACTCAAGAATCTTGCCGACAAAAACCAAGAAATGATGAGAAATCAATGACT
chr02	20751771	chr02	8.91	ATTTTATCCCTTATCTCATATTAATCAATAAAGTAAAGCTACGTTGAGCTTTTCCAATATTCACTCATGAATGCTTGCTAATTCTGGTTTCTTCATGTTGA
chr02	20751779	chr02	8.91	CCTTATCTCATATTAATCAATAAAGTAAAGCTACGTTGAGCTTTTCCAATATTCACTCATGAATGCTTGCTAATTCTGGTTTCTTCATGTTGATTGTTTTG
chr02	13779232	chr02	9.45	CTTTAACGACTTAAACCTTGTACGATTGTATATTATAAATTTGAGGCTCACGAGAAGAGCGTAATGTGCAAAAACATTACTTTACATAGTAATGACCCTGT
chr02	23433348	chr02	9.79	TGATTCACGCTTTCTTTGACTTGCGAATTCTTTTGCCAAAATAATGATTTTCTATATTCATTTTGTAATTAATTGCAAGATATCTCATGCATTTTATTTAT
chr02	23599775	chr02	9.85	GTTGGAAAGGAGAAAATGACATACTACTATTTTTTAATAAAAAATAGCAAGGAAACAATAACGACAAAAGGATTAGTTATTATAAAAATAAAAAAAACCTA
chr02	24352138	chr02	9.97	TGAAATAAGTGATTATAAACATGAATGTAATAATATTTATATAGCAACAAAACTTTTAAAATTTGTGATCTTAAATATTAAATAAAAGATTTTAATTTATT
chr02	23058085	chr02	10.54	CTCAACTTCCAAATATCACAATCTCCACCAAAAAAAGAAATCTCGCAAATCCGCTCATATAAAAAACCCTCAAATCACTTAATTGTTAACCAGTATCTTCA
chr02	23614589	chr02	12.05	CTTGATATTTCAACCGCTTAAATTTTGAAATCCAAAAATATAATAACTTTGACGAACAAAAGAGAAAGATAATATGTAATTTGTTGCAAATAAAAAGAGGG
chr02	23470892	chr02	14.68	AAACACAATTTGACACATACATAAAAGTGATAAGAACTGATAATGGAACTAAATTTGTTAATCAATTGTGTGTTGAGTTACTAGCTAAGTTAGGCATAATA
chr02	23083160	chr02	14.68	GATCTATAAAAGTTTCATTTCACATTTTAAGACACCAACATAAAGAAAATTTTGAACGATTTCTCTCCTGGTCTATATATAACTTTGAGCTATATATAAAA
chr02	26151182	chr02	16.21	AAAGGAATTCACCTTTATTATTCTTCGAGTAGAAATCAGGTAAATTTTGCATTGATATAAATTAGTCATGAAAGATAAATTTATGTGCGATAAGTTAATCG
chr02	25713886	chr02	19.6	GAAGTTTTTCAAAACAAAAATTGATAAAATCTCATCTAAGATCAACAATATCTTAAGAGAGAATAAATGAATTAGCTATATTATCAATTGAAAATGAATTA
chr02	21531688	chr02	21.27	ATTATTTTCTCTATGTAATTATATGCATAGATAAGTTACAAGAGAACATACGTATTATTTTGTGCATGTAACTATATGCAAAGATTAGTTATTCATGTATT
chr02	21531684	chr02	21.27	ATGTATTATTTTCTCTATGTAATTATATGCATAGATAAGTTACAAGAGAACATACGTATTATTTTGTGCATGTAACTATATGCAAAGATTAGTTATTCATG
chr02	21601289	chr02	22.2	GTGGAACTGATTGCAACTTTTCATTACTTCGAAGCGCTTTAATAGTCTCACCCTCTAACTCTTCCCATGTATTAGTCAAAATTCCATCAAAACACGTATAT
chr02	26661010	chr02	22.41	ATTCTTAGGAATTCAGATTCACATAGTGGGCGAACATTTGAAGATAACAACAGTCTGTCAAGCTGATTTTTGAGAAATTTTGAGATGTCAAGTTCCCTCTG
chr02	21869855	chr02	25.47	TACATCTCTACCTTAAATTTTCTTCAAGATCGTATACATATATATTAATCGGAGTCAAGTAATATGTAACGAAGCAAAAAAGTACTATGTTTTGTTGTTCA
chr02	21655746	chr02	25.47	CAAGTGTTGATAGAAAAGGTATATATTAAACTAAAATAGCAGATACATTTTTATAAGCTCTTGAACGAAGAAGGGGGCATAGATATTGTGTTAAGGAAGTT
chr02	26666270	chr02	26.15	ACATAGTTAAAATTTCATGGTACATTTTGATCTTTTACAACTTGGTTTGTCTAGAGCGTTGCCTTCATAATTATCTAGCTTTCTGTCTTTACATTCTAATT
chr02	28045963	chr02	26.97	TGACTTGACCATGTAAATTAGTATGGTTTGGTGTAATAAACACTAGGTGTGGGTAAGCTTTTAACATAAGGAACTCTATATGACACAAAATTCCCCCAGAA
chr02	28207780	chr02	28.67	GAAAAGGGGATTTTTGACCAAAAAATATTAATGGTGGGGGATTTTTTGACCGAAATATTAATGATAGAGACATTTTTAATCGAACCACTAACGAATAACAT
chr02	22347829	chr02	28.79	TTAAAAGATAATTTGTCTATTTTACTTTGTTACCAACTATTATTCATTTTTTGACATTTAGTTAACTTATAAATTACTCTACTTCGAACATGTTAAGTCAA
chr02	27559232	chr02	30.21	CACTTGCTCACCTATCACTTGGAAAAAATTGTTGCCTGATAATGCAGTTCAACTGTAAAACTTTACAAACTCAACTGTTTGCAGTTTTTCGGGTGAACTAC
chr02	27559242	chr02	30.21	CCTATCACTTGGAAAAAATTGTTGCCTGATAATGCAGTTCAACTGTAAAACTTTACAAACTCAACTGTTTGCAGTTTTTCGGGTGAACTACTTCACAAAAT
chr02	27559258	chr02	30.21	AATTGTTGCCTGATAATGCAGTTCAACTGTAAAACTTTACAAACTCAACTGTTTGCAGTTTTTCGGGTGAACTACTTCACAAAATGACAACCAGATAACAT
chr02	28726719	chr02	32.82	TCTGGTCCTCATGCATCTGTCTGTAGATGTTGAGATACTGCATTAAAGTCGGTCCCACAGAAAGGAAAATCCTTCTGTGATGCAATTTTACGAACTTCAAT
chr02	28738352	chr02	32.82	TTGATCAATGGCTTTGCTGTGCTTGTTACTCCCCAGCAGGTATGTTATCAGTGAGTGGTGTTGAAATTTTGTTTCATTAACAGCTGCCATTGCCTTCCTTG
chr02	28738361	chr02	32.82	GGCTTTGCTGTGCTTGTTACTCCCCAGCAGGTATGTTATCAGTGAGTGGTGTTGAAATTTTGTTTCATTAACAGCTGCCATTGCCTTCCTTGTTGCTAGGT
chr02	28842177	chr02	32.82	AACTTTATTTCTAAGAGATTCAAATAAATTTGAGGAGATTTTTTTTATAGAAAAATCAACTATTTCAATTTCGATCTTAAGATATATAATCGATTATTCTT
chr02	28858745	chr02	32.82	GCATATTCATAGTCCTGGTAATAGGAAAGATTAAAGAAAATACCAGAAATCAAGTCCAAATAATAACTGTATGAACAGCACGAATTATTTGCAGAAATTAG
chr02	28484521	chr02	32.82	CTAAAGACATGACAACTGCAATCGGTAGAAAGGCAGCTCCTGCACGGAATATAGTGGCATTTAGATCTTATCAGAGTCAGGCTGAGACTCTGGTTAAAACT
chr02	28595684	chr02	32.82	CGAAGTCGATCTTGTGATTGTTTGAATTTGGAGCGAATCTACAACAAAAGGATTGTCAACAATTTCGGATGCAAGTATTATTAAGGTACACATCATGTTGT
chr02	28597690	chr02	32.82	CAATGTGACACTATTATTTGTAGAAGGCAAAATTATTTAAAGAACTTAAGGACTAAACGAATTATCAAGACCAAGTTTTGAAAAAAACATAAATATATAAA
chr02	28631952	chr02	32.82	GTATCATCTAGTCAGAAGGTTAGAACTACTCTATATTTCGAATCTTTGTTGTTCACTTGTATTATGATTTTATGGATACTAGAATTTTTTGATATTTCTTT
chr02	28661338	chr02	32.82	AGTGATATTCCATTATGTCCTATTTTTTTTCTTAATAAGTGTGCATTGCCTCACAAATTCACTTAATATGAAATAAAAAAGAATAGATTTTTTACCCCTTT
chr02	28665955	chr02	32.82	ATGATTGCATCAATTTACTCCACACAAGTCCGTAGACCATTTTATAGTTCCTTCCCAAAAGAGTTGCTGCTAGCCAAATATTTGTCAAGAAAAAGGAAAAA
chr02	28692065	chr02	32.82	TCATAACCAACTATTCTTTAATCAGTATCATTATATTTGATTGTATAGTTCAGCAAGAACTTATCTGAAAGAATTAACCTGCTAAAATTGATTTCAAGCTG
chr02	28961365	chr02	32.82	AAAACAATTATACAGAAAGGATAAAATATATAAATGTATTTATACTTGCACTTTTTTAACTAAATAATTGATCGTATGTTATAAGTTATAACTTATAACCT
chr02	28961673	chr02	32.82	CTCACACTCAAAAAAATATAACAAATAATAACTAAAAAGGGACACTGTTGGTTTTATCTAATTTGATATACACATGTAATATACGTATCAAAAATATAATA
chr02	29008275	chr02	32.82	TTTTTTGATAAAAAACAAAGGCTACATAAACATGACTCTTAACTTGGCTTCAGCGAACAACTATGCCCTCCAACTTTGAGTGTGCACAAATAAACACTTAA
chr02	28717046	chr02	32.82	GGTTCAGTCTTTCACTAGAGCTCAATTAATTTAGATTTGTGCAATGCATGGCTTCTTTTTGGGGACAACATTTCCATTTTCCAATAAAAAAAAATTATATT
chr02	28923184	chr02	33.72	TAAACAAAGAATCATGTGATGCCCTCTGCTGCTCCAAATCAGAGTACTATAAATATTTTTGTTTTCTCTCCTGGCATCTCTTTTCTGCTATTGCTTACATA
chr02	28960621	chr02	34.04	TATATGATGTACCATTTTATTTTATTGTTAGAGTATAATCTTCTTTTTGAAACAAGACGAGGTACTATTTGACAACAAATTCGACATGCAATTGCATTAGC
chr02	28960628	chr02	34.04	TGTACCATTTTATTTTATTGTTAGAGTATAATCTTCTTTTTGAAACAAGACGAGGTACTATTTGACAACAAATTCGACATGCAATTGCATTAGCATAAGCT
chr02	29081748	chr02	34.34	ATATGTAATGAATTATTCAATAAAATCAGTGACGGATCGTTGGTGCTGATCTTTCTTTAATGTAAACTCGTCATAACAACAATAACATATCTTGTAATCTC
chr02	29536480	chr02	34.46	ACAATTGCATCTTCAATCACATCCACATCAAGAATGTGGAAGTTTTCCTACGTAAAAATTGTTAGTCTTCCGGTGATAATTTTTCAAGGCAAAAGATCACC
chr02	29259292	chr02	35.02	TATACTAAATTTTCTTTCCTTTTCTTACGAAAATGTTTTAAAATTTGATATATAATATAATACACCCAATATATAATATTATATAAAAAATTATAAAAGAC
chr02	29879857	chr02	38.81	TCTTATAATCTTAAGCATATCATGTAAAAAATTAAAATTTAAAAAAATAAAACATCATAGAGTAACATTGTTTCTCGTGTTAATAACTTGCTCTGCTCTTA
chr02	29935133	chr02	39.01	TTATAACTCAAAAAGTGGACGCAAGCTAAGGACTAAATATAAAACAAGAAGATGATTCATGACTCAAACTTCAGCTGATGACAGATGAAATCTGTCCTAGC
chr02	31559392	chr02	40.89	GGAAAAGACATTAGTCAAAGCCTTTTAACTACTTAACCTAACCCCAATTCCTTTGCTAGGAGGTCTGCAAAATTTAGTACTCCCGTCTCCGTCTAAAAAGA
chr02	30552654	chr02	41.56	AACTGATGTTATTTATTTATTGAAATGATAAAAAATTCAACTTTTCAGTAGCTAATCAAAAGGGTTGATATCATTGGTGTTGTGAAGAATAGAGTTATATA
chr02	33044153	chr02	43.2	TTTTGGATCAAGATATTAGTTGATGGTGAGATTCGAATCTAATAAGTTTATTTTTTTTCTAAACTATGTTAAAGTATTTGTCTATTTCATTTTAAAACTTA
chr02	31710471	chr02	43.23	TAGATTCACCTGTTGGTTGATCTTGTTGCCACTTTCATATGTTGTGTTTTCTTACTAGTTGAGTCTGACCATGTTAGAGTTAGTTGACATTTGCTATTTAA
chr02	33044051	chr02	43.3	TAGTTACAACATATAATCATATTTAAAAGTTTAAATTATTAAGTGAATTTCATTTTTATTATTATTTAATTATGTTTTTCATATCCGCACATTGGAACTAA
chr02	31314848	chr02	43.72	CAACAGATTGCAGAAGTTCAATTTTATTGTGATAATAGGTCCTTTAAATTACCCTTTACCACTAAAAGGACAAGCTCTTATAAGTTCTTCTTTAACGAGGT
chr02	31930257	chr02	44.05	TTCTCAATTTCCTCACCCCACACTCAAATTGCCTCTTCACTTCCCTCAAACATTACCAAGACTTACTAATAAATTTCAATTCATAATAGCAACCAATCAAT
chr02	32506997	chr02	44.24	TGTCACTGCAAATATTTCTGGCAGCTGGATCCCCACATATTGTAGAAAACATAAAGTTGTATGGCCCTCCCGCCCCACAACATGCAACTAAAGCTCCTTTT
chr02	35333821	chr02	44.27	TACCATTTTTAAGGCGTAATACATAAAAATACCCTTTATCTTGGCTTCAAGTATCAATTGACATTTATGTCCTCTAATTTTGTGTCTGCACAAATAGATAT
chr02	35333818	chr02	44.27	CTATACCATTTTTAAGGCGTAATACATAAAAATACCCTTTATCTTGGCTTCAAGTATCAATTGACATTTATGTCCTCTAATTTTGTGTCTGCACAAATAGA
chr02	31682198	chr02	44.89	ATAAAAGCCAAGGGAAATCCATTAATTATTTTTTCTACACTTTAAGTTATTTACTAAATTAAAGATGTATATAATCCTTTTTTTTCCTTTTTAAATTGGGG
chr02	32172910	chr02	44.99	GAGGAATTTTCCACTTTAACCAAAGCCCCTAGCTCAGGTACAACCAAGCACTTTGATGACTCTTGTTTGTAGAAAATGCCCACACATTTGCAATCTTTGTT
chr02	34995389	chr02	45.09	ATTTTGGAGTGCAGGCTTTAGTTAGCTTGGGTAAATTATGCTGTATGTTCCTTTTTATTTACTGAGTGCAGTTTCAGCTATCTAGTACATCCCCATCACTC
chr02	32159210	chr02	45.33	GTGAAGGATGAAAACCTGAGCTCTTTAGATGACTTGACAAATTCTCTTCCTTTAAGCTATTTCTTAATGTGTGGGTTAGATTGTAGACCTAATTTGACATG
chr02	33043858	chr02	45.52	GCATGCAGTTACACTATGACAAATAAATAGATCATAAATTTTTTTATATTATATAATTACTAAATAATGTAATTATTATCCTAATAATTATATTAATTTTA
chr02	32167359	chr02	46.17	GAAGAATTATAAGTACAAGTAATATTTATTATTGCCAAAGTGTAACTAATCTTCGATTAGACCTTGTTGTTAAAGGTCATTTTCTAAGTAAAAATCCCTAA
chr02	33045678	chr02	46.53	AAAATCTACCCCAAATATAGGGACAGTGTTTTAAAATTTCTCTGCCACGATTTCTTTCACCATCTTATTTATTAATAATGAAAATGAATAAATGGAATAAT
chr02	32621694	chr02	46.67	TATTAAAAATGTTCCATTTTTTATAACTAATGCGTTTGGTCAGCTTGGGTGCAACTTGACTCTTGCAGGGTGTATGTCTTACCTCCTACCCAGTAAAGGTA
chr02	32621700	chr02	46.67	AAATGTTCCATTTTTTATAACTAATGCGTTTGGTCAGCTTGGGTGCAACTTGACTCTTGCAGGGTGTATGTCTTACCTCCTACCCAGTAAAGGTATAAGAT
chr02	32086625	chr02	46.79	TTAAATAAGGACCTCAGAAATTGACAGAAGTAGATTTTTGAGAACATTAAACAAATTTTATCTGCTAAATAATAGCTCTTAGGAAAAGTAAATATCATAAT
chr02	33182010	chr02	47.81	GACAGAATCAGATGATATAAATTATAATGGATGACGTAACCACTAAAAAATTTCTTAATTAAATATTCACATAAGTAAAAAATTAAACTACAAAAAAAAGG
chr02	33313236	chr02	47.81	TGGCTTTTTCTTTTTAGTTGTTTTTTTCTTTCTTTCTTGTGAATGGATTTGCTCGTTTCAAATAGTATTAGTAAAAAGGTTGACAATAAAGTTAGTTTAAG
chr02	32910584	chr02	47.98	AACTAAACTTCCATGAAAGGTCCTTCGCTCTTGAGTTTCTTGTCGTCTCCGGATGTCCACACTTTTGTATAGAATAGTTACTTGTACAACTCCTTCTTTGA
chr02	33119967	chr02	47.98	AAAAACCAACAGAAACACTGAAATAAGAGAAAATGATCAAATCTGTATGCGTACTATAGGAATACATAAATGTCACGTTTCAGTTTATTCCTCGTGCGGAT
chr02	34374137	chr02	48.3	CAAGTGTGACAATGAAAGCTAAATTGTTTGACTAGCTAGTGGAATTATATTTATTAATCTCATTGAAAATGAATTTCTTCAATTGTTTTCCAAGCCTCTTT
chr02	34546304	chr02	48.3	TGCTGTAAGAACATGTAGGAAATCAGAGACTGATTTTTCTTTTTAAATGTTGAAAATCAGAGACCACTTAAGTCAGAATGTGATTATAGGCAATCACGAAA
chr02	34557033	chr02	48.31	AAATTTGTAATCAATTAGTAAATGCATCGTAGCATTTTAAAAGAGTAAAACTTTCGTCTAAATTTATCGTTAGTTTGAGGGATATATTTAACCCAAAAAAT
chr02	34887164	chr02	48.37	TGTGTCCATATAACATCTAACATGTTTTTTTAATATCATCTTGTCTTCATGATGCTATTGTGAATTATTGAAGAAATATCTTCTAAATTAAAATGGCATCT
chr02	34887170	chr02	48.37	CATATAACATCTAACATGTTTTTTTAATATCATCTTGTCTTCATGATGCTATTGTGAATTATTGAAGAAATATCTTCTAAATTAAAATGGCATCTTTTATT
chr02	34373872	chr02	48.37	ATATGATAAAGCATATATTAAACCTTTATTCCATGAATAAGGATTAAGTTGTAGGCCAAAACCATCAACGTCTACAAGAAAAGGCCCAATCTCTTGAGTTG
chr02	34368891	chr02	48.37	CTTTTTGTATTTGATTACTAATTTGGAGCGAACTCTTATTCTGTGAGAATTATTATCCTTTTAGTAATGTTTAATCGAATAAGATTTATTTACACGATAAA
chr02	34568024	chr02	48.37	ATTTATACTTTCCGTTGCAAACCTTGAAACATCACATCAACAATTAATCACTTTCTCAAGGACAAGTGCTTAATATCGTTATTTAAGTCATAGTCAAAGTA
chr02	34567949	chr02	48.37	GTAGACAGTCAAGTGAAAAATACCTGATAAAGTTTCACCAGCTTCAACACTTTTGTATCCCCATTTGCATGCTATATTTATACTTTCCGTTGCAAACCTTG
chr02	34562323	chr02	48.37	ACCAAAATCTGCTACACAGTATGTAACATTCAAAGTTCTACAACCAAAACAGGACAAGAAGAAAAACAACATCTTTAACTATTCACAAATAAAAAAGTGCC
chr02	34557471	chr02	48.37	TGAATACTGTATTAAAATAATATGTGACAGATAATATTTTCTAACATTTTAAAATAATGTAACATTTATTATTATTAAATATAAAAAGGATAACTTCACAG
chr02	34368888	chr02	48.37	TTTCTTTTTGTATTTGATTACTAATTTGGAGCGAACTCTTATTCTGTGAGAATTATTATCCTTTTAGTAATGTTTAATCGAATAAGATTTATTTACACGAT
chr02	34557466	chr02	48.37	TATTATGAATACTGTATTAAAATAATATGTGACAGATAATATTTTCTAACATTTTAAAATAATGTAACATTTATTATTATTAAATATAAAAAGGATAACTT
chr02	34367103	chr02	48.37	TTTATTTTTTACTTATAATTTTATGTCATACTTTAACAATCGATTGAATTTTGTGAGGAATAATGTCGCAATGAGCATATACTCTTAAAAAATCTGCACAA
chr02	34505633	chr02	48.37	TTCAGATAGTCACTGCCTTAACTGGTAACTTTTTGAACGGATTAACTTTGACTATTCTGTTCTGTGGTGCCAAATCATTTCATTGAAGGTAAAATGAGAAT
chr02	34499444	chr02	48.37	TGATACAAGTCATTCACTCCTGGTGAGTATTGTGAATATATTTTCTATTTACTCGTTTTGTAGAAATAAAACAGATCTAATCATTTGATATCTCCTGGTGG
chr02	34481410	chr02	48.37	TCAAGTCACTATAGGCCTACAATGATAAGCTTAATATTTAATCGTGACTTGGATGAATGTCATTATACAATAAGACTCCTTTTATGGAGTACATAGATCGT
chr02	34415681	chr02	48.37	TTTATGAAATGTAACACATGTGAAAACATTTGATTGCTTCAGGTATCTACAAATGCCAAAGAAGTTTCAGTCTTGATGCCAGGAAATGACATTCCAACTTT
chr02	34415668	chr02	48.37	TCACATTGAATCTTTTATGAAATGTAACACATGTGAAAACATTTGATTGCTTCAGGTATCTACAAATGCCAAAGAAGTTTCAGTCTTGATGCCAGGAAATG
chr02	34389381	chr02	48.37	TGTAATCATTTCCCTATAAAATAAGAAAATATAGCATATGGTATGGATTTTATATATCCTATGAAATTCATAGACCATGTGTCGTCTAAGATAAAAATAGA
chr02	34374096	chr02	48.37	TTAAAGAGCTGCAGAGACTAAAAAAGAAAGTGCATAAGACACAAGTGTGACAATGAAAGCTAAATTGTTTGACTAGCTAGTGGAATTATATTTATTAATCT
chr02	34832777	chr02	48.37	CATTTCTAAGGATCTTCATGCTTTTAATGTAGTATAAATTAATCTATATAGATATAAATATTTACACTCTGAATAATAGAGTAAAGGAAAAATGAACTATT
chr02	34832732	chr02	48.37	TTGTAAAGTCTTTTAATAAGGGATAATTATAAATGGTTCAAACAACATTTCTAAGGATCTTCATGCTTTTAATGTAGTATAAATTAATCTATATAGATATA
chr02	34816421	chr02	48.37	CCTTCCCTGACACTAAAATGCTCAAATCATCTGCTCTGTCAAGTCAATGACCACATTTTTTCTACGAAATGACCTGTTAACATGAAAAGTTCTTAATATGA
chr02	34796028	chr02	48.37	ATCTCATTTGATTATGTTCTTATATTATTATAGCTTTAAGTTAAACCTTGTTTAGTTAAACTAGTGACCGTATTCTCATTTAAAAGCTTAAATTGGGCCGG
chr02	34791306	chr02	48.37	GCGAATTACTTTACTCAAGTTTGATTTATCAAACTAAATTTTGATTCATCAAACCAAATTTTAGAAATCAATATATTTGATATCTATTTCTATTTTTTTTT
chr02	34791302	chr02	48.37	ATTAGCGAATTACTTTACTCAAGTTTGATTTATCAAACTAAATTTTGATTCATCAAACCAAATTTTAGAAATCAATATATTTGATATCTATTTCTATTTTT
chr02	34777947	chr02	48.37	ATAAAAATCCCTTAGATAATTCTTGGATAAGTCACTCCAAGTAAATATTCTCAATGCAAAAGAATAATTTCCACTTTTCAAGACACTGATGAACAACACTA
chr02	34747764	chr02	48.37	CAATTTCTACTTTACCATTTATATATATTCATTATCTTTTATCAAATATATTAACCAACCAAATTGACCAACAAATGGTTCAAAGTAACAATGTTGGTTCG
chr02	34679471	chr02	48.37	TGGCTATTCCATTGTCACAAAAGAGGGATGAATTCAAAGTTCATTTATCTCTATCTTTATCTTTTTAGGGCCTCCATCGACTGGGGAAGACTGACATTCCA
chr02	34679437	chr02	48.37	ACCGTTGTACATTAATCTATGCCCAGTATTCATATGGCTATTCCATTGTCACAAAAGAGGGATGAATTCAAAGTTCATTTATCTCTATCTTTATCTTTTTA
chr02	34661335	chr02	48.37	CTAGAATACTTTCTCCACTTAAATCGTTCATGTTGTGAGGATAATTAACATTAACATACAAATAAAAATGATATGACCAATCGTCTCATATTAAATATTAG
chr02	34660714	chr02	48.37	CTTTTAGATTTACTATTCACTCAAATCTTCTCTAAATAATCCTAAATTATATATATGGACAACTTTCGATGTTTTAATTCTTTTAATATATTGTATATTCA
chr02	34659189	chr02	48.37	AATATTAAACTTTTCTCTTTACATATCTTTATAAAAAAAATCATAAATAAGAAAGTTAGTTTTATTAATTTACCTTTCAAGAAATTTGTTGGAGACTTTAC
chr02	34659182	chr02	48.37	CATATTAAATATTAAACTTTTCTCTTTACATATCTTTATAAAAAAAATCATAAATAAGAAAGTTAGTTTTATTAATTTACCTTTCAAGAAATTTGTTGGAG
chr02	34591066	chr02	48.37	TATAATGTAAATCATTACTCTTATCTTTAACTTTATTTTTTTGTTGTTATTATTAAAAGAAACTATAGATCGAGGTGATGTTGCAACTAGACAGAACATAC
chr02	34590246	chr02	48.37	AAAAATTCTTTTGGAATGTTGAAATCTAGTCTCATGGATTTTTTCTCTGAATGAATGCCATGGTCCTCATTTTTTATTGCTTTTCAGTAGTTTTTATGTCA
chr02	34579178	chr02	48.37	ATGTTTCAAAATACACCCCTTCTCTTGTACGCATACAGTTTAAGATGTATATACTACTTCTCAAGTATTGTTTGACAGGTAAAAGATAAGAGGTAAACATG
chr02	34887161	chr02	48.37	TCATGTGTCCATATAACATCTAACATGTTTTTTTAATATCATCTTGTCTTCATGATGCTATTGTGAATTATTGAAGAAATATCTTCTAAATTAAAATGGCA
chr02	34887044	chr02	48.37	ATACAAAGTGAGATCTTTTGTTCTGCCATAAGCAACTATGGAATAAAACAAATGGGTAACCCCAAAATTTTATTTTATTTTTGTATAGAGCATGAATATTT
chr02	34887021	chr02	48.37	GGCACACTGATTTATTAAAAAATATACAAAGTGAGATCTTTTGTTCTGCCATAAGCAACTATGGAATAAAACAAATGGGTAACCCCAAAATTTTATTTTAT
chr02	34832841	chr02	48.37	CACTCTGAATAATAGAGTAAAGGAAAAATGAACTATTATATGAGCATAATTATACGATACAAGTACTTGTACTAAATTATTAACAATTACATTAATGTGTA
chr02	34885263	chr02	48.37	AAGTTAGCTTGTAAATGCCAATATATGTCTGAAAAAATGGTGGGACTATATGTAACATTTCCCCAAAATTATTACGGAGGTCCTCATAAATTTTTTCAGAA
chr02	35422993	chr02	49.12	AGTTCTTCTAGTATCTTCAACTGGTGCTTTAGTATCAATGTTGCCAATTCATGTAATAAAATCTTCCTCAATATCAGACTCTACTGATGTAGTAGCTGTAT
chr02	34917717	chr02	49.83	AAAACAAGATTTAAAATATATGATCACCTGACCTAGTTCAACCTCAAAAGCTAGTTCGTGATGAGAAGATTGCTCAAATTCATAAAAATACACCATCAGTC
chr02	34917698	chr02	49.83	ACAATAACATTTTTCTTATAAAACAAGATTTAAAATATATGATCACCTGACCTAGTTCAACCTCAAAAGCTAGTTCGTGATGAGAAGATTGCTCAAATTCA
chr02	35140420	chr02	51.5	TTGGAGTAACATTTTGACAAAAAGAATGAAAAGATTAAAAGAGAGAGAATTTGAAGGTTACCCATAATTTCTTTTTCTTTTGGAATAGAAATTGCTTATGG
chr02	35548996	chr02	51.97	ATGATATGTTGCTTCATCAATATTTTGAAAGAAAAAACAAGAGCTCACACGAGCTCTTTTTTGGATACAATATTTCGAAAACATGATTGAATCCTTTTTTG
chr02	35359034	chr02	52.37	TTTAATAAGAAGCATATTACACATTATAATAATTTTAATTTACTCTTTTCTGATTGAGTTCCAAAGTTGGCAAACTTAGCCCTTGATCAAAGATAAACCAT
chr02	35948100	chr02	52.37	TTCTTTTCATTTTAATTTATACGATGATGTACAGCATTGTATTTAAGCTACGACCATGCCTAAACATGTGCCACGTAGCTATAACACATCGTACCAAACAA
chr02	36596143	chr02	56.82	ATATAAATATTGACCGTATAAATAAATTTTGATTTACACAATTAGTGTAATTTCCGATATATATCTTTTTGGATCTAATTATACAATGTGATAGTAAAGAA
chr02	36415176	chr02	56.84	TAGCTAGTTTAAGATCACGCAAATTATTAATTTTAAGGATTTTTTTGGTCATTATTTTAAATCATGATTTGAAGTTAAATATTTTTGTTTAGACATGCAAT
chr02	36814285	chr02	57.89	CATAGGTATATTAGTGATACAGTTATACATAATAGGTATGCTAGCCTCTCTATCTCCCCTTTAAAGTTCTATCTATCAAATCATCCAAGTGCAGAAAAGAG
chr02	36616896	chr02	57.9	TATTATTAAGGGATCATATCAAGTATTGGATCCTACCAAATTAATTTTTTCAAAAATTAGCTTAGACTACAGAAACATAGCATCAACGGAGTGACAACTTA
chr02	36709630	chr02	57.98	GAGACATAATAAAGGTGGAATTTATAAAATTAGTTGGGGCAGTAAGGTGAATAAAATAAATGGGGCACTTCAGAATTACAATCACTATACTATATATGAAG
chr02	37946718	chr02	59.06	ATTTTATTCATCTATTCTAATTTCTAACAAATCAACTAAATTTTATTACTACCTTTCAATTTTGCATTTTATAATAAGCTAGTAAATTTTATTTTCAAATA
chr02	37037371	chr02	59.71	CATGGTTAATTTTTAACTGTTACAGGCCGTTTGGTTCAATGGATTTGGTGCATCATCCCTGTATAAATTTTTAGGATTAAATTTATCTCATGTTTGGTTGG
chr02	40588151	chr02	59.97	TGTGAATGCTGATTAAGTTAGAAAGAACAAACTTCTATTTATAGAGTCCTAAATTTTTTCCTACAAGAAAATGACTAGTCAATCCTAAACTTTTTCCTAAA
chr02	40537000	chr02	59.97	AAGTGCATACAGAACACTCTCTTGGAGATCACTTCATATCATAGAATAGAAAGACACCTAGATGTCTCACAACTGGATACTTACAAATTTAGCCAACAAAA
chr02	37446319	chr02	60.13	TAAAGACTTAAATATTTGCTTCAGCAAATTGCCCTTTGACATGAATTATCCCAGCTTGGGCTAAGTTGCTTTATTATATAACGTTATATATCTGGTGTTTT
chr02	37339679	chr02	60.55	TGGATACTGTAAAAGCATGATGCAACAAATCGACGAGCTAAGGGCTAAGTTCATTTTTCTTCTGTTTTCAGAATGAGTAAAGAGTATCCATTTCAACAACT
chr02	40257674	chr02	60.73	AGTGATCAATTCAAATCATATCGTTATGTTGAAACTGTTTTGAATTGTGTCGTTTGAGTATCCTATGGAATATCATTTGTGTTGTCACTATTAATGACAAT
chr02	40257676	chr02	60.73	TGATCAATTCAAATCATATCGTTATGTTGAAACTGTTTTGAATTGTGTCGTTTGAGTATCCTATGGAATATCATTTGTGTTGTCACTATTAATGACAATGG
chr02	38406143	chr02	61.05	TTCAGTAGGCTTGGTTTTAGTTTTGCTCGTACGATTCATCTTAGGATATGAAAAAGTAGTTATATTGTTGTCATTTACCATGAAAAACAATGTTATATTAA
chr02	40512438	chr02	61.07	GTACAAAGAGAAGCATCTCTCATAAAAATGTTTTCTTGTGCAGAATATTTTCCTTATTGAATCAATTTCCAAGTTGTATGAGTATCAAATCGTTCCTGATC
chr02	40257645	chr02	61.08	CTTGGCATTATGTGCGCTTATGATTAATTAGTGATCAATTCAAATCATATCGTTATGTTGAAACTGTTTTGAATTGTGTCGTTTGAGTATCCTATGGAATA
chr02	38662694	chr02	61.16	GCAAGTGAAGCAGAAACTTCCTTTTCAAATTGGCAATCTCAAAAAAGGAGCGGAACTTTAGCAACTTATAGTCTTGGAATAATATATGTTGGAATGACTGA
chr02	40370009	chr02	61.31	AATGATTTATGCAATTTTTAATAGCCCAATACTAATAAGTAAATTTTACACTTTGCTTATCAATTACGATTTAATTTTGAAAGCCCTTAATATTTACTCTA
chr02	38384393	chr02	61.43	AAAGAAAACTTTCTCTAACGTTTGATTATGTAATTTGTACTTTTTAATGTTTACTATATTACAAAATCTTCTCTTATTTAAATTTATTACTACTAATATAC
chr02	38058270	chr02	61.59	TTGTACTCTCCGTCATAATATCCACTATCCTTTATACCTGTGCTAAAAAAAAACTGAGATCACTTATCGAAGTCAAATTTTACAAGTCGGGTTTGGAAGGG
chr02	38464237	chr02	62.31	TTAACTTTAAATGTAGTGTACACATTTGATGAAATTTTGTATTTGAACCTATGACATTTTGTATCCCAAAATAGTATGAAGTTGTCTCCAGAGGGGGCTAA
chr02	39014619	chr02	62.62	TCTTTAGAGAAGAAAAAAGAAGTACTTTTGATTTTTCTGATCGAACAGACCGTAAAACTTTGCTATAGATCTTAAATAACATCCATTCAAACATATGTTAA
chr02	37436741	chr02	62.74	TCTTCTTGTGTAAAATTTCTGGTTGACAATTAAATTCTTATGGAATTTTGGTTGTGTTAATGGAGAATTTGTGGCTTCTTCTTTTCTTTGACAGATGCAAA
chr02	37436727	chr02	62.74	TATGACTGTCCCAATCTTCTTGTGTAAAATTTCTGGTTGACAATTAAATTCTTATGGAATTTTGGTTGTGTTAATGGAGAATTTGTGGCTTCTTCTTTTCT
chr02	41317124	chr02	62.92	ATAGTTTAATAGTGTTTGATTGAAATATCCTGACAAATTTATGAGAGTGATTATATATGTTGCTTTATTTTATATTTTTATAATATTAATGTATATAAATT
chr02	41494822	chr02	63.44	TTCTATGTTGGATACTAAAAATATTTACACCAGAAATATACCATAATTATGCATTGCTTTTTAAAATACCAGCATCTCTTTCTATATAAATAGTGAGTTTG
chr02	41335984	chr02	63.44	AGCTTTAAAACTCATTTAGAGTTGCAATTTACTCGACGAGATTTGAGACCCGGCAACTTGAATCACAAGATTAGTGCCACAATTGATCGTCAGAATCAGAA
chr02	39105492	chr02	63.5	TTTTATCACAATATTTTATTAATTGATATATAATTTTAAATTTTGCGAAAAAAATTGAGAATTAAGTAATTTATTATGAGAGTAAAACATGAAGAATAAAA
chr02	41759893	chr02	64.09	GAACCTTAATTGTTGTTGTATAGAAAATAAAGTAATTCTGAATTTGAAGTGTAATAGGATAATATGAAAAATATTATTAAATTACACTGTGAATATATATA
chr02	41759880	chr02	64.09	TTTATTTGAAATTGAACCTTAATTGTTGTTGTATAGAAAATAAAGTAATTCTGAATTTGAAGTGTAATAGGATAATATGAAAAATATTATTAAATTACACT
chr02	41484269	chr02	64.22	TTAGACATTCCAAAATAGTATAACGGACAATATCCAAAAATAGAAGAGTGAACAACAATTTGTATAAATCCAAAATTGAAGGACATAAATATGAAGTCAAG
chr02	41328968	chr02	64.25	AGCTAATGCAGAGGTTAAAGATTCTGCATGCACAATATATATGTTTTGAAGAAAGGTTTTAGAGTACAAAAAATGTGTGTTAGTTTTATTTATACTTAACA
chr02	41328969	chr02	64.25	GCTAATGCAGAGGTTAAAGATTCTGCATGCACAATATATATGTTTTGAAGAAAGGTTTTAGAGTACAAAAAATGTGTGTTAGTTTTATTTATACTTAACAT
chr02	38997993	chr02	64.52	TCTATGCACCAGTGTAATCTGAACCGTCAAGATGAATCTAGAAATTGTACCAGATAGGAGTTTTGACTGTAAAAATTGAGAACATAGTTATCCCACCTGCT
chr02	41614430	chr02	65.26	ATGTTGCCATCCACTTCCCCTTGCTATACCTGATTTTTTGTTACAAAAAATAATCTTAGTCCAAAAAAATTTCGTAGAAAAATGTAACGTTTACTTACTTA
chr02	41649191	chr02	65.26	TCACCCAAAAGAAACAAACCTTGCACTGGATAAGTTTCCATAATATTTCTCCATATGAGAAAGTAATACCATAAACAAATTGGCTATTTGGTTTAGAGTTA
chr02	41794953	chr02	65.26	TAATAATTTTTGCTCAAATAATGTGTAGTCTATTTGTATTGAAAAGTTTACTAAATATATCCAAATATTAAATTTAAAATGCAATTATTAACTCTTGATGA
chr02	41764084	chr02	65.26	ATCTGATTCTAATAATAAGCTACCCTATGCTCCAATCAACTAACTGTAAATGTTTTCTTTTTCTTTCTTTTTTAGCAATATCAATCAACATGAAAGCTATG
chr02	41653326	chr02	65.26	ACAAAGAAACATACTTCATGATAATTACTTTAAGAACAAGCCCAACCCACAGAAATCCCGAAGGAGATGCTTCGCAATTCAGGGATCCTGTGTTCCCAGCA
chr02	41652889	chr02	65.26	AAAATTACTAAGCTCTTTGAAACCAGTACCTCAATGATATGACTGAGGAATTTCTCAAAAGGAATGTGAACTCCAAATAACCCTACAACCACTACCCCTAA
chr02	37703648	chr02	65.34	TTTATGCATAAAACACCAGTAACAAGCGTGTGTACTATATAATAGAGAGAGAGAGATACCAATTAAGATAAGAATTACAGACACCAAGGAGAACAAAGTGT
chr02	41827254	chr02	65.38	TAAACACAATAATAATTATATAAGTGTTTGTGGTTTTTGTTCTCAGGAGTTAACCATGTTTTTGTGTATGTAATTTGCATCTCCTTGATGCCTTTCAAATA
chr02	41832711	chr02	65.44	ACTTAAAGAAATAGCAATAGAGCGGGAGTGCAGGACTAATGATATGCCGTGTGGGGTAGAGCAGATTGAAATAATCTTTTTAAAAATAATGTATGGCGGCG
chr02	41832756	chr02	65.44	GCCGTGTGGGGTAGAGCAGATTGAAATAATCTTTTTAAAAATAATGTATGGCGGCGGATTTGGGGTAAAAAAATAAAACCTAAAAGTTGCTTTATTTATGA
chr02	41435028	chr02	65.73	AGAAAACAGAATATCTTAATCAGAACTTTGACGGTACTTGTCATTTGCAAATTTTTTTTAATTTGTAGTGCCTTTTGTCATAAGGGACTCCTTTTGTCCAC
chr02	38332636	chr02	66.26	AATTATAGAAGAAGATCTCTTATTAATTTGACATGCAATTTCTAAGAGGAGTAAGAGAAGAAATACAAACACAATTGTCTAATGTATGGTTTAGAGAATTG
chr02	38957313	chr02	66.4	AGCTTATAACACCAAGAGTACTCTTATATCCTTGGATATATAGTATACACATTTTTGAGTACTAGTATATACAAATAAGTTTCCTTTAGGATTGTATGATT
chr02	42025584	chr02	66.55	GAAGGTATATACGACCTTTATAGCTTCCACATGTACTAATCATTAAATTACGCAATATCATCATGAATTCAAATTTTCTTTTCTGCACTTTGCATCTCACT
chr02	41644885	chr02	66.99	TTTTTCTTAAAGATTCTCTTTTAGTTTTTCCTTTCCATGGTCATTAACCAAACATAGGAGATTTGAACTCACAGATTCACATTGATTATAAATATATATAA
chr02	41644874	chr02	66.99	CTTAATATTTCTTTTTCTTAAAGATTCTCTTTTAGTTTTTCCTTTCCATGGTCATTAACCAAACATAGGAGATTTGAACTCACAGATTCACATTGATTATA
chr02	42103313	chr02	67.5	AATAATAATTTAAACACAGTATTTGCAGCATTCTATAGTTTGCTTCAAATGCAGAGAGCTTCTCTTAATATGTTGTATGAATCTCAATTAGTTGCCTTTGC
chr02	38362987	chr02	69.52	AAGAGCGAAATTTATCCTATACACAAGATAAGTGACTGTGATTCCTTATCGTAAAAATTAGGGAATACCGATAATTGTAAGTATACATTTAAATTAAGGCT
chr02	39180458	chr02	71.25	GACAAAGATATAGTGGCATTGTCTGGAGGACACACACTGGTATTTTGTCTAATGCATCTGCATTTAGATATTTATATATTTCTCTCAAATGATAATGCTGT
chr02	39291058	chr02	71.25	CCCTTTTCTCGAGCACCTGTTGTCGTATAATGTTTATTTCACATCTTACTAAATCTGATATTGGATTTTTCAGTTCTAACAGACTCTTCAACAAATTAGTT
chr02	39349850	chr02	71.25	TTCTCTCCTATTCTTGAATACATCATTGTACACGATGCATGTATCGATCAAATACATCACTATATGCACTGTATCAGGACGTAATACATCACTTTACACGA
chr02	43319423	chr02	74.26	ATTTCAAATTACTTGGAATATATATTATATTTAAGACTGAAAAAAAGATTCGACTTTTAGGAGTTTTTCCAACTTCACTCTCTAAAACTCCATTGTGTTTA
chr02	39609150	chr02	75.53	ATCTTTTGGTTTGCATATATAGTCTGGAATCCCAAAGTGGGTGTCTTGCATTCTCTGAAAGAGTCCCTACTAAGAATCGTCCTTGTGCATCCCAACGTCTC
chr02	43800256	chr02	85.74	AATACTTTAGCACTCTTTTATTAATGTATTTATTTATTACCGCTAAAAGTTATTTTTATTGTAGTGATAGTTGAAAAATTGAAACAAAAGGGTACCATAAA
chr02	43846774	chr02	85.75	CAAATTATTTGAATTAAACATTTTATTATGCTCAAATCTTTTAATTTTTTAGGGAGGTACTATTTATTTCTTAAATGGAAATAACTTTACCACTCTGTTTG
chr02	43821513	chr02	85.75	GCTGTCAAGGGTAAAGTTTAAAAAAGGATTTCATTTACTTTAAAACCCTTAAAAGATGAATAAAGAAAATAAAATAGTTGACTAAATGTAATATTAAAGAT
chr02	43883489	chr02	85.75	ACTACACCATGTTAAACTCAAACCTCTATATATTAAAAAATAAATTCACTGTAATTATTTCTATATAATGTAATTAAAGGCCGAGAAAAAACTATCACATT
chr02	43928449	chr02	88.83	ATTTTAACCAGTGATCTGCATGGGTTAGATCACATTGTTTGCGATTTCGTAGTTGTCCTGAATCTCCCAGAGAGAGAACGCCAAATTTATAAAAGAATTAA
chr02	44254751	chr02	89.01	AATTATCATCATCTCATTTTTAATTATTTCCTGAGGTGGCAATTAGTTGTGGATTAAACTTATAGACTTTTTTTCATCACTAATACGTACGTGCTTAGCTA
chr02	46236830	chr02	92.56	CATGACCCTTTTAATTTAGCATTTTCTACCTAAGGGATGAGACAAACATATAAACACGTTTAAGCTTATCTATGCTTTTGGTAAACACTCAAAATACACGA
chr02	44720498	chr02	95.26	TATTTGATAACAATTTAATTTTAAAATATTTATTCTCCACAAATATCTATAACTTATTTTAGATTATTCAGTTTCAAAAGTCTATTTCTTTCATAAATTTT
chr02	45641256	chr02	95.41	GCATCCTTCGCATTTTCCCAGATGGAAAATCCCAATGTGTTTGTTTACAATGCATTAATAAGAGCTTTTGTTCATTGCCACAGCCCACATAAAGCATTACT
chr02	45641247	chr02	95.41	CCAGATTTTGCATCCTTCGCATTTTCCCAGATGGAAAATCCCAATGTGTTTGTTTACAATGCATTAATAAGAGCTTTTGTTCATTGCCACAGCCCACATAA
chr02	45522456	chr02	95.42	ATGATCAATTGATCATTTAAGACTTACATTGGATAATTGGGAAACTAAAAAGAGTAAATCGGCTTCTATACAATACCTTACAAACTGCATAGAAGATGCAA
chr02	45332402	chr02	96.43	TCTTCTATACTATGTCGCCGTATTTATTATGTACAACATCTGCCTATGGTCATAAAACACTAAAAAAAGGAAATATGACTATTGACAAGTGATGCATCACT
chr02	47919348	chr02	100.87	TGTCAATTATTGTTGCTACTTCTGCAAATCCATTTGGCTCCTCCATCAAAGAAACACCACAAGTGAAGCTTCTCTAGATATATACTACTACTAGTAGTTGA
chr02	46697744	chr02	101.31	CCTTATGAACGATGTCCTTGGGGAGAGCATCCTGAGGAGACCACCCAGGAGAATGTGAAGGAAAGAGCACTTAAACTTTTGGATCAGTATAGAAAGAAATC
chr02	47036853	chr02	103.59	GGAAATATTGATAAAAGCTGAGAAAGTTAATAAAAACGAAAGAAAAAAATGTTTATTTATTGAATTTTAGATTTTTTAAAAGGAAAATTAGTAGTTTATCT
chr02	47036890	chr02	103.59	GAAAGAAAAAAATGTTTATTTATTGAATTTTAGATTTTTTAAAAGGAAAATTAGTAGTTTATCTCTTTTTCTACTGGATAAAAGAATCTAAAAATCAATAT
chr02	46993090	chr02	104.3	GTGCCCTTGTGTGTCTTTGTAAGCTAGATTTTCTAGAGCTGATAAGTTTTGTAAGTATCTTTGAAAGCTAAATTTTTCACCATATTTAAATTTTGTATATG
chr02	47053344	chr02	106.82	ACATCACATACTTGTTATCTCCTAAGAAATTTTGTCCACCAAGACATACACAATTATGAAGAAAGCACCTATATAGAGTAAAACCCAATTACACTCTCTCT
chr02	47053347	chr02	106.82	TCACATACTTGTTATCTCCTAAGAAATTTTGTCCACCAAGACATACACAATTATGAAGAAAGCACCTATATAGAGTAAAACCCAATTACACTCTCTCTGTA
chr02	47053350	chr02	106.82	CATACTTGTTATCTCCTAAGAAATTTTGTCCACCAAGACATACACAATTATGAAGAAAGCACCTATATAGAGTAAAACCCAATTACACTCTCTCTGTATAG
chr02	47090027	chr02	106.82	TTAAAAATATAGTAATTATAAAATACTATTTGTTTACACTTTATATATTGCTCAACTTTACAAATAAAATATTATATTGTCGTTTAATATTTACAGTAAGT
chr02	47151293	chr02	106.82	GTACAGAACATAACTTATGGGATATTATGATGTGGAAATATAATTTTATAATCTACTAGAAATTATTAGAGCAACTTTCACATATAGCAAACACAAAAATC
chr02	47189557	chr02	106.82	TTGTGATGAAACTACTACTATCTTTTGTAAAGGAGTTTTGATGAAAAATAAGTAATTCACCCGTTTCATTTTACTTGATCCATATCGTAGATATTTTATTT
chr02	47326850	chr02	106.82	AAAGTGTGGATGTTTCTTACTTCCCTTTCCTTATGCTGTTATGCTTTTTGTCTTGCATGTTCTTTCACGGGTTAGACTTGAAATATGTATTATCAGCAAGA
chr02	5793057	chr02	0	ATTTCAAGTCTTAGAAAGTTTTATAAAAGAAAAGTGGAAATCTAGACTTGTCTCATTAGCCATCTATTACAATCGAAGTCTCAATATAGGGTTACATCCCT
chr02	5793071	chr02	0	AAAGTTTTATAAAAGAAAAGTGGAAATCTAGACTTGTCTCATTAGCCATCTATTACAATCGAAGTCTCAATATAGGGTTACATCCCTTTAAAACATAGTCT
chr02	7283206	chr02	1.88	GATAGGGGGAATGTGCAAGCAAAAGATATGTAGACATGGGCAATAATTTATCATCATCAAAAAGGAGGGAAATGTTGTATTTTGGGATTTTGATGATTTAA
chr02	5349425	chr02	2.44	AATTATCAAGCATAGTAAATACATAGTCTGGTAATTACACTGATCTATTTGTTTGTCACAATGTAGTTACAATGTAATTATAAATGTGCTATTTGGCTACA
chr02	8363069	chr02	2.44	AGTATTATGTTAAATTTTTTGTTTAGAATTTAGAACTTATATTATATTTTAAATTTCATTTGTTTAGGAGTATTGACGTGATAATTTACATTGCAAGCTAT
chr02	7388202	chr02	2.44	ATTTACAAACCAACTACAACATTAGTTGGCAGAAAACTTTACCCTTCAACCTATGGTCCATATGGCTAACAAGGAACAACAATACTGAAAAATTTATAAAT
chr02	12095736	chr02	2.94	CCACATATATCTCTATTGTTACAAAAGTGACTCACATATACCCTTTTCATCTAACGGAAGTGAAAAAATAATAATATTATATAAATTATTTTTGATTTTTT
chr02	8998007	chr02	3.51	TCTAGGAACAAATACCTATTACAAAATGTTTAGTAAAGTAAAAGGTTACAATATTTCAAACAGAGAATCAGTCAAAGAACTAGAGAACTATGACACCTGCT
chr02	8998052	chr02	3.51	TTACAATATTTCAAACAGAGAATCAGTCAAAGAACTAGAGAACTATGACACCTGCTTCCTTAGGAACATGTTCTCTTCGATGAAATTTGACTCTTCATGAT
chr02	9032190	chr02	3.51	GAAAATATATTATCTTATTATTTTATCAAAATCGATGATTTTTTTTAACTTGTCCAAGTTGGAACATGAGAAAAATAATATCTTAGAAAATTTATTAATTT
chr02	9032195	chr02	3.51	TATATTATCTTATTATTTTATCAAAATCGATGATTTTTTTTAACTTGTCCAAGTTGGAACATGAGAAAAATAATATCTTAGAAAATTTATTAATTTACCGA
chr02	9344458	chr02	3.51	ATAGCACTTTTTTAGTTCTGAAAATGGTAAAATGATTAGGCATAGTTGATGTTTATGACCTTACATTGATGAGTGATTACCTAGCCCACCGTGAATTTATT
chr02	13938721	chr02	3.51	TAAAATATAATTATTTCAAACTACAGGGAAAATTAGTAAATATGGTAGAAATATTTGTGTAGTTAGATAGTTTCTCCATTTAGTAAATAGAGAAAATTTCA
chr02	6899172	chr02	3.64	AACTTGGGGCTGCTTCCAAGTTTTAATGGTTCATGATCCCTCACATTATCTTTGCCCGCTTTACCTGTAGCAGTGGACCTAAAATAAATTCTGTGGAAGAT
chr02	8208220	chr02	3.64	GCTTTACTAAAACTCTTGTGTCTTGATGTAGGAATGACGAAATCACAAGACGTTTGATTATTTAAAATTTAGACACAAAGGTCTACAACATATTCAAAATT
chr02	8208194	chr02	3.64	GTCATGCTGAAAATTTCAGATTTGTGGCTTTACTAAAACTCTTGTGTCTTGATGTAGGAATGACGAAATCACAAGACGTTTGATTATTTAAAATTTAGACA
chr02	4446227	chr02	3.64	TTTTTCAAGTAGGATTAGACCATGACCTTTGGCTGGAACATGGGACATAACCTAACATTGTTGGAAGTAAATAAGAAATGTGGATGTCCTACGGTAAATTC
chr02	4446263	chr02	3.64	AACATGGGACATAACCTAACATTGTTGGAAGTAAATAAGAAATGTGGATGTCCTACGGTAAATTCGCATGACTTTATATTTTTATTTATGAGTTTGAAGAC
chr02	6737241	chr02	3.64	TTGATATACACTTGTTATTGCTTGGAATGATCTGAATCTGAAGCAGTTTTAGGGGTTAGATTCATTGATGATCTTTTGGGGCTTTTATTTTCAAATTAAGT
chr02	8230637	chr02	3.64	TGTATTCAAAGAGTTTTTATTCTAATGTTATAGATGGTTTGAGACATAGTGTCATAGACTCTTTTATTTTTATAAAGAACTTCAATTGTAAAGAAAAGTTT
chr02	8450887	chr02	3.64	GACTACGATAGTCCGTGAATACCTCATAGTGAAATCTATAAAAATAGTTTCGCCAAATCTTTAACGCGAAGACTATCGCTGCCAACTCCAAGTCATTAGTG
chr02	5350476	chr02	3.65	ACAGTGTAATTACACCCAATTAAACCAAATCAAATTACCAGATTGACTTTTCAAACAGGTACTTAGTTAAATTACGTGACTAAATAAAACAAAAGGAATAA
chr02	5543717	chr02	3.66	AGCTTCTTCTTAATAGAAGAAAAATTGTTTCTGCTTCCATTTAAAAATAATTTTTTGATTAGCGAAATATCTGAATTATCTAAAAAATATGTTTCTCAAAA
chr02	2708617	chr02	3.66	TACCTTGAGGATTTGGTTTCTCAAGATACCAAACTTTGAAGGCTTTATTATATTTGTGATCATATTCATAGGTCCAATTTTTTATATGAAGCACATTCTTC
chr02	5931604	chr02	3.75	TTTCCTAGGAACAAATTTTTCTTAAATTTTTTTTTTTTTTGTTTTCTTTGAGTCTTTTTATGTCGAACCAAGTTGGTGTTTACCTATGAAAGATTGAGAGG
chr02	18102962	chr02	3.98	CCCTAACACATGTAGTTCTCTAGCTCAATAACTTTTATTGAAATGGCTTAGCTAGAAAGACAAACTATTAATAGGTTCCCATGGATAATATGTGTTTTCCT
chr02	15942920	chr02	4.94	TCAAAATGATATGATTAATAGGGTATATTGATTGTTTCCTTTTTCCAGACGTCTAACCATTCCTAAGAATATTTAGTTTTTCTGTTATTAGGTTTCCTTTA
chr02	3744475	chr02	5	AATACAACGTGATGCATAGAATTTTCAAAGAAATTGATGCTATGAATCAATTAGAGTCAAGTGTTCTTTATTTTTACTTATAGGTGGAAGGACACATGAAA
chr02	9017988	chr02	5.17	GAAGTGATATAGTGTTCTAATCGTTTGTAGATGTAGATATTTTTGAAAAAATAAAATAAATAACAAGGGGTTGACAATTTATGTCAAATGGGGAGATATGT
chr02	8965947	chr02	5.17	GTAATGACATATTTTGGCACATTTATTTTTCAAATGCGCGTTAGGGCTACCTCTGGCATAAAGAGGTCACATATATATTATGACACATCAGTTAATATATT
chr02	9459447	chr02	5.17	AAAGCCAGATCCTTATCGATGAGTAACTCTTAACAAAAGTCTTAAGAAAGTCATGAGACTTCAGATGGGCTTGAGAGAAGCCTATGAGTGAGTTTAACTGT
chr02	15914713	chr02	5.17	ATATTTATTATCAGTTTTGACTTCTTAACCGTCTGATTTTCGATTTAATCGATAAGAAATTACTCATATAATTTTACATACACAATGTTAATAAAATAAAA
chr02	12884115	chr02	5.17	ATTGTTGCTTGAAATTTATCTCAATAAGAATATTTCTTAGCCAAATGTCTTGAGAGACACATGTTGTAGCTGCAAGAAGTTCAGCTTCAGTTGTTGACAAA
chr02	12155785	chr02	5.17	TCACCCCATTATGCCTTTGTATTATTTTCATCCCAAGTCTACAAATGAAACACTTTCTCATCCATGATAACAACTATGATTGATAAGATATCTGTTTTACA
chr02	12009159	chr02	5.17	AATATAACATATGACAAAGCAAATAAAGTTGATAAAAGGAAGGCGCAATATCAGGTCATTAGCAAGAAAGTTCATCATGGTGATGTTGTACAGGAGGACGA
chr02	11626983	chr02	5.17	ATTCCTTTATACTAGTGGATGTTGTGATGACCTCCATGTCATTTCTATGTTTATGCCTTCTATTCATCGTTTACAGCGTCCCTATAGCGACCCTAAAATAT
chr02	11319044	chr02	5.17	TTTCATTTCAAGAGATTGATTTCAAAATTTTAGGCTTGTTTCAACTTAGATTTTAATCAGTAATTAGTGTTTTTTCCTTATTAAGTAACATTAAATTTAGG
chr02	11626981	chr02	5.17	AAATTCCTTTATACTAGTGGATGTTGTGATGACCTCCATGTCATTTCTATGTTTATGCCTTCTATTCATCGTTTACAGCGTCCCTATAGCGACCCTAAAAT
chr02	14550523	chr02	5.39	TTACTTTCTCCTCCCTCCCATATAGTGCATTACTTAGTTATTATTGTATTATTGGAGTTCTTACTTTTTATATAATATAAATAAATATTGATATATAATAA
chr02	14637936	chr02	5.39	ATGCAGTTCTATCAAGGTATCAACCATATGTTCTAAGATAAATCTAGAAGCCATGTCAAAGAGATCAAAAAAGATAGTCAAGGATGTTATATTCAAACTAA
chr02	14647651	chr02	5.39	GATTGTATATGCTTATTTGATTGTTTGTGTTTTTATTAGGTATAACCTTCAATGTATTGATAAAAATTGCAACTGATCGTTTATATCTTCAAGCTTAAACA
chr02	14909141	chr02	5.39	GGGACAAGACCCATGACATCCTAATAACAAAATTGAAAAATAAACTCAATTTGAAACCCTCCGAAAAGAAAAGAGGCTCACCAACTCTAACTTGAACACGA
chr02	14933037	chr02	5.39	TAAAAATAAGAGTTAGAACCATAAAATTCAATTCAAGAAGTTTATTACTTAATATACCCTACTTTAATATGTTTATTGTAATGCTTGAAAATCTAAGGAAA
chr02	15023904	chr02	5.39	ATATTTTGTTATTGCTTTTGAAATGAGTTGAGTTGAGGTGAGTATTCTTCCAGTCTTGTTAGTTCAGTTATCTATGTTTTTAGTTCTCCTTGCATGCTCGT
chr02	15025175	chr02	5.39	TTAGATCTCATACCTATGACTCAAGCCATAAATCCTGTATCTACACAATGGAAACTCATACATACTCAATCATGTTAACAAAATTCATGATCTTAAACGTA
chr02	8079504	chr02	5.63	TAATCTTGGTGCAACCAAGATGTGTCGTTATCTAAGACAATATTATTGGTGGAGTAGAATGAAGTGTGACATTATTAATTTTGCTTTCCAATGTCTGAATT
chr02	5554985	chr02	5.63	AAAGTCGGTCTTCTGACAATTTTTCGGGGGCATGAAAATTTCACCAAGTTCGTGCTGCTTCTGAATCCCCTCATCTTGAAGCTGAAAGAATTAAGCTTGAG
chr02	6814019	chr02	5.69	GATCAATTCTACTTTTAAAAAATCAAGGTTATCACGAACTACAAAATAAGGATAAGCTATATATAGAGTCACTATCATGAGCCGAGGTGTCAGAATGTCTG
chr02	6841265	chr02	5.69	CACAAGCAATTATAGCTTCAACATTTGATTCTCCTATTAAGGTCCTGCATAACATTGTTGCACACAATATAAATGAGATAAATGAACAACAAACATGTAGA
chr02	9092520	chr02	5.92	CCATTTCCTTATATATTAAGTTTACCCTTTTGAGATTTATATTTTGTTTTCATGATTCGTTTAGTTATGTTGTTATCTTAATGTCGTGCATTTCCATGTAG
chr02	12172067	chr02	5.92	CATACTATTTCAGAAAGATTGGATCCTTATATTGCTTCAATTCTCACCGACGTTTGTTGCTCTTAACCACTTCTTTTTTTCCAAATCTGAATGGTGTTTGG
chr02	12286340	chr02	5.92	GAGAATATGTGATATGACCATTTGTTTGCATAGTCAACACGATAAGGTAGCTTTGATAACTTGAGAAGGGTTTGATTGAAGGATTGTAGTAGCTAGGAAGA
chr02	12420931	chr02	5.92	AGATCCTTCACTTATCATACCTACTGAAGATATTGGTATCAAGGATATCTTATCTTATGAGGAGATTCATGTGCAGATTCTAGATCTCCAAGTTCGTAAGT
chr02	17388915	chr02	6.05	CACAAAAGAAATCATAAAAGGATGTTTTTGTACTGAGTGATTAATATATACGAACTGAGTGAATATACCAAGTGGATATAGATATGAACTCTGTTATGTAG
chr02	17541534	chr02	6.22	TTGGCTTAGCTTATTAGCAATAAATTCTTTATTTTCTTAATCATTTTTACATTGTTCTCCGTGAGATTTGACCCGATTAATAGTTGTAAAAATTATATTCA
chr02	17541544	chr02	6.22	TTATTAGCAATAAATTCTTTATTTTCTTAATCATTTTTACATTGTTCTCCGTGAGATTTGACCCGATTAATAGTTGTAAAAATTATATTCAACGAGCGAAC
chr02	17426918	chr02	6.43	CCTCTAATTCTTTTTCGACCTGCATATACCTTGCCTAACTCATTACGTACGACCAAGCTCTCATACATCCTCACTAATACACTCTCACACTTCCTATTCAC
chr02	17201163	chr02	6.43	TCAAAATCGAAAGTTTTCTATGATGTTTGAGGTTATTTGAGGCAATTGTTCTATAAAATCTCACTAGAATGCATAAATGGGTATTTAAATATTGTATATGA
chr02	15208487	chr02	6.44	CTGTACCTAATTATTTGACATTTAGTAGAATTATACCCTAAATCAAATACCTTAGAATTGAAATGATAGTAAAGAACCCTGGTAATGGTTTATATTCATTT
chr02	15208868	chr02	6.44	TATTTTTGGGAAGAAGCTAAAAGTTTTTGTTTCTTAAAAAAAGCAGAAGCAAAAAAGAACAACAAGACCAAACTATCTTTGTCATATATACATATTTACCA
chr02	15753064	chr02	6.44	CAACGCATATAAAGAGGCTAGCTTAGTGGTCAAGGGAGTTTAGGAAATTGCCTCAACGTCTTGGGTTCGATTTTGAGTGACAACACTTTCCTCTATTTTTT
chr02	15772769	chr02	6.49	ATATTAAGAGTAGATGTTATAAAGAAGAAAAAGAAATATGGATTACTAACAACTTGAATGTATGATTTTATTAGATATTAAATGCATTAATCATTATGCAA
chr02	15296391	chr02	6.49	AACCAGACCTTTTTAGGGTGCTGATAAATCTGAACTCCATTTTCAAAACAAAAAGAGAGACCACATAATTCATCGGATTCTTGAAGTTGGCAAACATTTTA
chr02	17496125	chr02	6.69	TAAATAAGAATAGACTTCCAAACCTAACACTAACAGAAGTTTTTGCCGCACGAAAAAATTCATATTTTGATTGTTCTGGTGTCACTTGTCTTTTTTCAATT
chr02	11844755	chr02	6.72	CTGGTTAGGCTTAAAACAAAGTCATTGGCCTTAGGCCCCCAATTTTAAGGACCCCATTTTTTAGTTAATTAGCTAGGATTAAAGTAAAAAAAAAAGTTAGA
chr02	10121862	chr02	6.74	ATGGGTGTATTGTATATATAAGATGACGAGTATATATGCGGATAACAAGTGAATATACATGGGGTGTAGGGTAGTCACGTTGTATACCTTGTTAATTGTCG
chr02	10121880	chr02	6.74	TAAGATGACGAGTATATATGCGGATAACAAGTGAATATACATGGGGTGTAGGGTAGTCACGTTGTATACCTTGTTAATTGTCGTAGCATCAGTATCTGTGC
chr02	10121881	chr02	6.74	AAGATGACGAGTATATATGCGGATAACAAGTGAATATACATGGGGTGTAGGGTAGTCACGTTGTATACCTTGTTAATTGTCGTAGCATCAGTATCTGTGCA
chr02	10565372	chr02	6.74	GATGTTGGTTTCTCGAATTTTGTTTAATTTTGTGCTATACATGAAATGCTGATGGGTAGTGTAATGGGCTTATCATTGCTTATTTAAATTTTGTGCCTTGG
chr02	11271259	chr02	6.74	CTAAAATGGAATGTGAACTAATTTTATATATTGTTGAGTATTCAAATGAAAGATATATATTTCAAAGTTACAAGTAGATTTCTCTAATTCAGTTAAACATC
chr02	11591724	chr02	6.74	AGTGTCAACTCATATCCCTTCACTAGATACAATGTGACCTAAGAATTCCATTGACTCAAGCCAAAATTCATACTTGGAAAATTTGGCATACAACTCCTGAT
chr02	12486957	chr02	6.74	TGGACGAACACTACCAAGCATGTGTTGAAAGTTTATAGGGATACCCTTGACTATATGGTAGCAGATCATGTACAATGCATATAATTTTTATTTATTTATAA
chr02	9757157	chr02	6.74	TAAATTGGTACTAGGCTCTAAATAGCGAGCTTTATTGACTGGCCATATGAGTTCTCTTGGCACAACAATTCCAGTAGCGAATGTCTTGATCATTGGCAACT
chr02	9102370	chr02	6.74	AAGTTAGGGCAGATAAATTATGGTTGTTTCTGGTGGGGATATCTAATTCTAATTTTAGTTTTGTAGATAAATACAACCATTTCAATTTTTTATTTCTATGT
chr02	9069698	chr02	6.74	GCTTGTAGCTACTAGACATTTGACCAGATGGCAGGTGTGCATGGACTACTATATGATAAACACATAGACTGAGAAAAACTATTTCCTAATGCCATTATGGA
chr02	9114265	chr02	6.74	TTTTCCTTTATCATTTTGGTGTCCTTTGGGAATACTACACAATATGCAAATCATTGTCTCAAATCAAGTGGAAGGTGATGACAACTAAGTCTCAAAGCAGG
chr02	12583454	chr02	6.74	GAGAGGATACTTATTCTTAATAATAACCTTGTTCAACTGATGATAATCTATACACATACAGAGAGAACCATTCTTCTATCTCACAAACAAAATTGGAGCAC
chr02	12563199	chr02	6.74	TAGAAATCTCCCCAAGGCTGGCAGAACCAAACAAACATCTTGGTGCATTCATCCGCATTCATATGACCATGTGATTGTCAGTAAGCTGCAACAATGAATGA
chr02	20514248	chr02	6.81	GAATGTGTAATTTAAATTTTTTAAATTGTATTTTTTTTTTCATAAACATAAAAATCTCAAAATTTGTAATGATTATCAAGAACTTTCTCAATTCTTATCAA
chr02	20514214	chr02	6.81	TCAGTTATTTAAAAATGAAATTGAATTTTTTTTTGAATGTGTAATTTAAATTTTTTAAATTGTATTTTTTTTTTCATAAACATAAAAATCTCAAAATTTGT
chr02	20192471	chr02	6.81	CACTAAGAATAACAATCCAATACATACCAACAAGAATTGTGATAGACTTGTAAGGACTGGATACGAAATTACATTTGTTAGAGAGCGCTTTTATCTTCCTG
chr02	14550689	chr02	7.16	TAGGGAGTGTTCAAATTTCATTGAATTGTAAGATTCTCAACATCTGTAAATCACACTTGAGTATTTAAGAAGAGAAGAAACGAAAATAATAAAAAAATGTA
chr02	13556066	chr02	7.22	TGACTTGAGAAATCGAGAATTTGCACTGATTCTGATACAAGAAAGAGGAAGGTGTTGTGTTTTTGGACTAAGTTACGTTGTTGAAAGTCATTTGATTATGT
chr02	14687139	chr02	8.63	CCAAAGTGTAAATTTTCCATTCAGCCTGACCATCGATCTGCGGGTGAAAAGCTATGCTTAGTTTAACTTAAGTACCCAGTCCTTTCTAAAATGATGTCCAA
chr02	20766751	chr02	8.89	AATAGTTCTAGTAAAAACCTATTCTGCATGATGACTCAATTTTGTATTCGATTTTTTCCAGAATTGGTTATATTTCTGTTTCCACTGCAGAAAGGAGGTGA
chr02	20764537	chr02	8.89	GGTAAGGAAGGTTAAGGAAGGTGGCTATAACATTAAATTTCTTATGTCTTGACTTCTAATACCTGAACCAATGTGCAGTTATTCTCTGAATCTCTTTCCAG
chr02	20743777	chr02	8.89	AGAGATTTATTTTTGGTTTTGATAAAATTAATAATGAATAAATCATCAAATTGGGATCATTTGAGAATTTATATAATTATAATTATATGATATTGATAAGG
chr02	20735161	chr02	8.89	AAATTCAAAAGTCTTTTTTGCTTTATTAAATTTCGTGTCAAGTCAAAATAAGTAAAATAATATTATGATAGATATTTATTTGCAATACATTAGTCCAAACA
chr02	20735144	chr02	8.89	ATTAGTTTTAGATCACAAAATTCAAAAGTCTTTTTTGCTTTATTAAATTTCGTGTCAAGTCAAAATAAGTAAAATAATATTATGATAGATATTTATTTGCA
chr02	20672904	chr02	8.89	CTCAGTATCCGTCTCTCCTCTCGAATTTCTTTCTTGCTGTGAAAATGGAAGACATCATAAGTAAGTATACATATAAATGGATAAATTATGAACAATTCATT
chr02	20650916	chr02	8.89	AAGTAGAACACCAAAACATTAAATTGGTATGAAAGATTGAAAAATAATGTTAAGGAAGTTGAAAAGAAACCAAAATATTGAGAAGAGGACAGTTTAAGGAA
chr02	20514964	chr02	8.89	TCAACAATGGTCATAAAAATATATGTATATTTTGTACGTTGAAACCTCTATAGTGTGATGAATTTGAATTCCTCTAGAACTATTGACCATATAAATAAACG
chr02	20496889	chr02	8.89	AATCAACACCAGTAGCAAAATCCGCTTCAGGTAGGAAAACTACTCGAAGGGCTGTGAAGAAGGTGGTAAAGAAAAGTCCTGCTTCTTCTAAAACTACCTCG
chr02	20496833	chr02	8.89	TATATTTTTTCATGCAGCTGAAGAAGCAAAGGCTTCAGATGCAGATGGAGCTGTTCAATCAACACCAGTAGCAAAATCCGCTTCAGGTAGGAAAACTACTC
chr02	20079912	chr02	8.89	AAAAACTATTTTAGCTTAAAAAGAACCTTAAACAAGCCAATTCAAACAGACTCTAATTAAGAATCGTACATTCTTGACATATTCAATTATAATAAGGTATG
chr02	19860756	chr02	8.89	ATAGATAGTACATAATGTCATAAAGTGAATCTCATATATGAGCTACTACATACCATTATAAATATTCTTCACTTTATTTAAAAAATTTGAAGTTGGAGTTG
chr02	19826610	chr02	8.89	CAACTATGACCAACTCTTAAACCATAGATCTGTATAACCAATAAGAAAATCTTCGCAGAAAAGTGGAACAGAATCAACTTCATCTTCTTGCGGTGGTTCCG
chr02	19596630	chr02	8.89	AATCTAATTTAAATTTAAAAATTAATCAAATTAACTTTTGAAATGCGCAACATGACAAATAAAAGTGGACATAGAGAGTATCTTCTATCCCTTGAGGAGAG
chr02	19586161	chr02	8.89	ATTTACCTAATCCATAAAAGAAACACTGATATAATATACTCCCACATTGAATGTAACCATATTTAGTGAACTTCTATGAATCTATAATGAGAAAGATAAAA
chr02	19553085	chr02	8.89	ACAAATCTTTTATTTAAAATCACAAAATTCTAAAGACTTTTTTATTTCTTTTAAACTAATTGTTAAATCAAAATCAAACAAACAAACTAAAACAATTGATA
chr02	18900630	chr02	8.89	GAATTGCATAAAAAATGAATAAATGAAATTGTGGATCTTGTAAAAATACAGATCAAGCACTTATTAAAGAACAATTCAAAGATTTTTTAATTTATGTGGTA
chr02	18316859	chr02	8.89	ATCTGAAATTTATTTGTTTGATTTTCTTGTCTCGGTTTCTCTTAGATACTCTACTTCACTAGACCATTTTTTCTAGGAAGTAAGATCTTAATGGATAAATG
chr02	21540223	chr02	8.89	ATTAAAAAAAAATAGTGGGATATGTTCATCGTAAAATGTTTGTTTGATAAGTACATATAGATAAGTATATCATTGTTTGTATTCTTGCAATAACAATTAAA
chr02	21242931	chr02	8.89	TATTCTATATAATTTATATATCAGCACTTATAATTAAAGTTTTCTATGTAGAAAGTTTTTCATTTTGAAAGAACTTAATTTTCAAGGAGATTTAACACAAC
chr02	21242929	chr02	8.89	GGTATTCTATATAATTTATATATCAGCACTTATAATTAAAGTTTTCTATGTAGAAAGTTTTTCATTTTGAAAGAACTTAATTTTCAAGGAGATTTAACACA
chr02	21227789	chr02	8.89	TTGTTGTTGTATTTTTTCTTTTATCATGTGATAGTTGAAAAAGTTTCTGGTGAGAAGAGGAGAGTGAAAGACTATCTGCATACGGTTTTAGCATTTCTTGT
chr02	21208002	chr02	8.89	TTAACAAAGACAACTAGTTTTGTCAACGCATGCAAATTTGACCGAGACTTTGTAACAAAGAATTGAAATCATCATTATTGTGGAGTCTATTCCCACTTGGC
chr02	21173946	chr02	8.89	AAATAATTAAAATTTTATCCCTTTAGTTTCTGTCTTGCAGACTAGCAACCGGAGACAATTTAATAACAATATAAGCACCTGCATCAACTAAACACGGATAG
chr02	21164431	chr02	8.89	AGGACAAGTGTGATGCCTTAAAAATCGCCACACAAGTTTATTTCTTCTCCAATATGACACGTTAAAGGATTTAAAATCATCTTCATTAGTATATATATTAT
chr02	21146274	chr02	8.89	GTATTCATGTGATGTTAAGTTAATTGAAGCAATGAGATTATAATGTAATGCTTCTGTCTATATTTTCTTGAATCGAACATATTGGTTTGAGTCTTTCTAAT
chr02	21086677	chr02	8.89	CATGTATTTTTAACTGCTTGATATTATCATTATGACTATTAGAAATTATAAGTTCAAACACTCATTCATTGTTCAATTTTTTTTTATTTCTAGTCCTGGGT
chr02	21077617	chr02	8.89	GATAAAGCACAAGTAAGAAGCTTGTATCAATTAACTACATCTCAGTCTCACGCGCAGATGCTATATTATCAGTAAGACCATATTCCTTCCCCTCAATTCGG
chr02	20971145	chr02	8.89	CAATGCTTCTTTTGGTAGAAACTGTTATGACTTTGTACTTATCCCAAAGGACCCACAATAAAAGGGGAAGGAAACTCGTCAGTTCTCCATTACGTGCTTGC
chr02	20874376	chr02	8.89	ACACCATGTTACATCTAGGGTGTACCCCTAGGTCATGACATGAATATTGAGCTTGTTGTTGAGGATATGTAATTGTTAAAGTGTTGTTATTAAGTTGTGTG
chr02	20807373	chr02	8.89	TTTAGTTGACTTCATGATCAATAGTTCTCAAGTAACTGCCTACAACACGGCAAGTATCTGCCGGAACTGTAAAGTTATTTTTACGTTTACAACTTAAATCC
chr02	20766752	chr02	8.89	ATAGTTCTAGTAAAAACCTATTCTGCATGATGACTCAATTTTGTATTCGATTTTTTCCAGAATTGGTTATATTTCTGTTTCCACTGCAGAAAGGAGGTGAA
chr02	13779213	chr02	9.45	TCCTTATAGTACTTATTGTCTTTAACGACTTAAACCTTGTACGATTGTATATTATAAATTTGAGGCTCACGAGAAGAGCGTAATGTGCAAAAACATTACTT
chr02	23433326	chr02	9.79	AATTTTCTTTGTTTTTTATATCTGATTCACGCTTTCTTTGACTTGCGAATTCTTTTGCCAAAATAATGATTTTCTATATTCATTTTGTAATTAATTGCAAG
chr02	22373785	chr02	9.85	TGTTAATGGATACTTTTCATAAATTTATCATTATGGCTAATGGTTTAACTTGTGACCAATTTTATATATGCATTTATCCCGACAAATATGTTTTCCTCTAT
chr02	24905538	chr02	9.97	TTTCATTCTTTCTGAATCAAATTATTGTGTACTAATGAACCTGTAATACAACCTAAATTATTGTCTCTATTAAGGGGGATGCAATAAATAAATAATTAAGT
chr02	25046212	chr02	10.54	TATCACCAAAAAATGATTTGTATAGTTGACATTTATCATTTGTATTTTTACAATCGAATGTTAATATTTGATTTATATAATCAATTGTTATCATTTGTATT
chr02	25046209	chr02	10.54	TTGTATCACCAAAAAATGATTTGTATAGTTGACATTTATCATTTGTATTTTTACAATCGAATGTTAATATTTGATTTATATAATCAATTGTTATCATTTGT
chr02	24946854	chr02	10.54	GCAGAGAAAGCATGTCAAGGATTTCATAACTTGTCGCATTTCTAGGTTGTTAGAAGCAAGTCAATAACATTAGATGAACAGAAAATAAATTTAGAGGAAGC
chr02	24946721	chr02	10.54	TGAAAAATCTCTAGGAGAGGTTTATTTTAATGAATGCCGATGATGAGAGTAAAAAAAAGCTGAACTGCAGTCAAGTACAGAAGGTTTGGTGTAAAATACCA
chr02	24227674	chr02	12.05	CACTATTCTAGGCATGTTTAACCATAGAGTTTTCGCCTGACATATAAAACGACTCTATTAGATGACACATTTATTTATTTACTTATTTAAATATTTTTTTT
chr02	26086012	chr02	16.21	CCTGATTCTCATGTGAAATTGTCGGCCAGTTTGACAAGGCACACCCAGTCATGAACTTGTGAGTAATTTTCGTTTAGATATTTTTACAATAATTCGTTTTA
chr02	26086022	chr02	16.21	ATGTGAAATTGTCGGCCAGTTTGACAAGGCACACCCAGTCATGAACTTGTGAGTAATTTTCGTTTAGATATTTTTACAATAATTCGTTTTAATTAGGCAAC
chr02	25353469	chr02	19.6	ATTATGATTTATACAAATGATTTTTATGCGTAGACGTCATACATGACATATAACAAAATCAAATTTAAATCTTTATGATGGGAAGACCCAATGAGATGTTA
chr02	25369145	chr02	19.6	AGAAAAGCCGCCAGATAAGTCTCATCCCTGAATGATTCTTCTACGCCTAGCTCGACAAGAGGAGCATTCTCTTCTTCGGTTCGAGGCAAAAAGCTCATGTC
chr02	25390381	chr02	19.6	TTAAACTTTAATTTCATTACAATGGACTCTATTTGTCTCAATTAATGTGGTACACTTCGAATTAAGCGTCAAATAATTTAATTTTGACTATTAACGGGACA
chr02	25392511	chr02	19.6	CCTCCTCAGTGATCACACCCTTGCGGACAAAGTATCTCCAAGCTTCTAATGGATATCGACCATCACAATTCACAACCATCCCCACATAAATAGCCCTAGCA
chr02	25392518	chr02	19.6	AGTGATCACACCCTTGCGGACAAAGTATCTCCAAGCTTCTAATGGATATCGACCATCACAATTCACAACCATCCCCACATAAATAGCCCTAGCATGCTACG
chr02	25502494	chr02	19.6	TTCAATCTTGGCTTTTCTCTGTACTTGAGTTTTAACAATCAAGTCTGCTTATTGAAATGCAACAATAAGATTTGGGTCAAAAAGGTTAACTTTTCGAATCC
chr02	25640448	chr02	19.6	TCGGTAAAACATTCAATAAGTTGTATAATTAACTTGTGCTTCAAATACTTTTGTAGTCCTACTAAAATACAATTATATAAAGTGTTTTTAAAGAAAATAAC
chr02	25717479	chr02	19.6	ATACTTATATACAGATATATTTATATTGTAATATTAACACAAATTGAAATGGTGATTCGTGAATACAAGAATATCTAGATACATAAGTAAGCTATCCAATT
chr02	25944847	chr02	19.6	AGTATTCCCTCTTTTTCTAATTACTTGTCAACTTTTCCTTTTTTAGTTGTCCCTAATTACTTGTCCATTTTGACAAATTAAGAAAGGACAAAATAATTTCA
chr02	25914422	chr02	19.6	TACACACTTTCAGTTCATCCTCTTCTCAAATTAAATGAATTATTGATCATGACATTATTTAATTGCCTATATGTTACCTTAAATAATTTATAGTGCTATGA
chr02	25858924	chr02	19.6	GAAAGAAGTTCATAGTAATATCGAGGCGATAAATGAGGAAGACAAAAAAGGGGATTTGAGTAATTTAGAGTGCGATGAACATGAAATAAATGAGGAAGAAA
chr02	25814729	chr02	19.6	GCAAACATGCAGGGATGGAGCTAGAAGCTCGTTAATCTTTTTTTCAAGATTAAAAATTTAAAACACTAAATTGTCGTGAGAACAAACATAATTTATGAGAG
chr02	21601288	chr02	22.2	CGTGGAACTGATTGCAACTTTTCATTACTTCGAAGCGCTTTAATAGTCTCACCCTCTAACTCTTCCCATGTATTAGTCAAAATTCCATCAAAACACGTATA
chr02	26670672	chr02	22.41	AATATCATATGTCCAAAAGAATACTTTCTCGATAAGATCCGTGCAACAAGCTATGAAAATTTTAATCAAGTCATAACCAATAATATTAATCTTATAAGAAT
chr02	26684544	chr02	22.41	GCTAGATTTGTTGTTATTTGACAAATTATTGATTATTCTTTATGATACATAAAATTTATGTTTTTAACTTCAGATTATTTAGAGTAGATTTTGGTGTTGAA
chr02	27204492	chr02	22.41	CAAAGTAAAATTTAAAAAATATTATTGTTATTTTCAACCAACAATGATGACGACATTCAGTGAGTTCAGATGGTTAAATGAGAAATCACTTATAATATAAA
chr02	28000354	chr02	22.41	TATCTTAATGGTCTAGAGAGAAAATCGGAGATGTTCATTTTCAAGCTTATGTATGGGAGGCCAAAATGCAATTATTGAAGAATCAGATGTGCTTGTAGATA
chr02	26640369	chr02	26.15	CCTTTATACCTTCTTATCTAAGGCCATGTCTAAGATGCGTCAAATCATGTCTAATCACCTCTACTCAATACTTCTTTGGATAGGTAGGTGTGTTTACTTTT
chr02	26670757	chr02	26.15	TTAATCTTATAAGAATACGTAAAAACACAATATAATTGGGATATGAATACATATTTCAAATATCATATTTCTCTTCTAAAAAATTTTACTTTTTGATAAAC
chr02	26710127	chr02	26.15	TGGGAAGTACCTAGGCTTCCCTATTTTTCTGAAAGCCTCTAACATTAACGACTTTTAGTTTATCATTGATAATCTACATCAAAAGCTATCGGGGTGGTAAA
chr02	26715590	chr02	26.15	TACAGATAATTCTAAAAAAATAATTTATAATAAACTAATTATGTAAATAATCTCTTAATGAATATCTTGTCATAAGATAAAGCAAAGGGAAAAACAATGAG
chr02	28045962	chr02	26.97	ATGACTTGACCATGTAAATTAGTATGGTTTGGTGTAATAAACACTAGGTGTGGGTAAGCTTTTAACATAAGGAACTCTATATGACACAAAATTCCCCCAGA
chr02	28207821	chr02	28.67	TTTTTTGACCGAAATATTAATGATAGAGACATTTTTAATCGAACCACTAACGAATAACATTTTTATTCAATTTTTCATAATATAAGGATATTTTTTTTACC
chr02	22391253	chr02	28.79	AGAGATGAATTGTGAAGCCCTTATAATGAGTCCACTCATTTTATTAACCATCAATGTGAGACTTTTGTCACTTTTAACGATTTGCTATATGAATATTATAT
chr02	22347807	chr02	28.79	TTTATTTATCCGATTTAATAAATTAAAAGATAATTTGTCTATTTTACTTTGTTACCAACTATTATTCATTTTTTGACATTTAGTTAACTTATAAATTACTC
chr02	28418500	chr02	33.72	TAGAAGTATCATTAAAATTTAGAGTATATATGATAGAATTAGATAAATAAAAGTTAATAAGTAAAAGTAAAATCAGAAAAAAATATTCAAAGTGAGATTTT
chr02	28402859	chr02	33.72	AAGGAGTTTTAAACTTGAGATTAACTCGTATCCACTAATCAAGGATAATAAAATTACACGATCAATGTACTTTTATAAATATTGTTAAGTATTTTTATATA
chr02	28961494	chr02	33.72	TAATAAATTAATCAGAAGAAAAGGCTTTGATTCAATTAGTTTTCTTATTGCTCTATTGGGTTAATCATAAATTCAGTTTGACCTAAATTTTTAGACAGATT
chr02	29112120	chr02	33.72	CTATAGTAGAAAAACAAACTCTCTCAGTTTTCCTAGCAGAGGCATAATTGGTAATAGAAGACAATAAGGAAGCAACGGAACAAAAACTAAGCAAGAACAAA
chr02	29072351	chr02	33.72	TATGGACTTGTATACTTGCAACAATAAGAAAGGAACTGCTGTTCTTTGCAAGTGAGAAGAAAAATCCTGTTTTTTTCTGGGTTTTCCTCGAATCATACTAA
chr02	29072350	chr02	33.72	GTATGGACTTGTATACTTGCAACAATAAGAAAGGAACTGCTGTTCTTTGCAAGTGAGAAGAAAAATCCTGTTTTTTTCTGGGTTTTCCTCGAATCATACTA
chr02	29072332	chr02	33.72	TGTAGTCTATGTGGAAGTGTATGGACTTGTATACTTGCAACAATAAGAAAGGAACTGCTGTTCTTTGCAAGTGAGAAGAAAAATCCTGTTTTTTTCTGGGT
chr02	29026916	chr02	33.72	GTTTATTGTCACAATTCACTATCAATTTAAGAAACTTTTTACATCATTAAGATTAAAGAATTAAAATGTGAAATTTGTATTTTATGAGTAAGACAAGTAAT
chr02	28990523	chr02	33.72	ATAAGAATGAATTTTATCAATCGTGGGTCATTTAGGTTAGTTATTGAAATATAGTGCTCAGGGTTCTGTGTGGTAGTTCGGGAAGTTGTCGAATGATTCTA
chr02	28967052	chr02	33.72	TTCTGCTTTGGATTAGCGTGGAAAAATTATACAGTATTATGTTTCAAATCTAAAAACTATACAGTAAATAGCAATTATAATATCACAAACATAGTCACTCT
chr02	28368725	chr02	34.34	TACCAAATATATGGTCTATAAATTAATGTAATAGGAGTTCTGAAGAAGAGATCTTTAACTTAAATACAGTTTATACATAGCTGTTAGACATGAAATAAAAC
chr02	28898082	chr02	34.34	GTACAAATTTTAAGGAATTATTGTAATTAGAAAAAGAGTAGGGATAGTCCGATATTTATTATCGGACTATCGATTAAACCGTCAAAAGAAAACCTCAAATA
chr02	29536493	chr02	34.46	CAATCACATCCACATCAAGAATGTGGAAGTTTTCCTACGTAAAAATTGTTAGTCTTCCGGTGATAATTTTTCAAGGCAAAAGATCACCTATAAATTCATTT
chr02	29259313	chr02	35.02	TTCTTACGAAAATGTTTTAAAATTTGATATATAATATAATACACCCAATATATAATATTATATAAAAAATTATAAAAGACATTTATACATCATATACATCT
chr02	29259279	chr02	35.02	AGATATACAATAATATACTAAATTTTCTTTCCTTTTCTTACGAAAATGTTTTAAAATTTGATATATAATATAATACACCCAATATATAATATTATATAAAA
chr02	29879865	chr02	38.81	TCTTAAGCATATCATGTAAAAAATTAAAATTTAAAAAAATAAAACATCATAGAGTAACATTGTTTCTCGTGTTAATAACTTGCTCTGCTCTTATAAACCGT
chr02	29854492	chr02	39.01	CTTTGTAGAAAAGATCTCTTCTTCATTTAATTATTTGCTACTACAAGACTGAAGTTGCATATCTGGGGCTTTTCAGCTAGACTTCCGAGCTTTGTTTTTCC
chr02	29854493	chr02	39.01	TTTGTAGAAAAGATCTCTTCTTCATTTAATTATTTGCTACTACAAGACTGAAGTTGCATATCTGGGGCTTTTCAGCTAGACTTCCGAGCTTTGTTTTTCCA
chr02	29879881	chr02	39.01	TAAAAAATTAAAATTTAAAAAAATAAAACATCATAGAGTAACATTGTTTCTCGTGTTAATAACTTGCTCTGCTCTTATAAACCGTCTATCTCCCATAAATA
chr02	29894500	chr02	39.01	GAAATATTTCAAGAAAAATGTTCAAATTCAACCCTCTACTTTTGATTGTTTCTTAAAATTCCCCATGGTTAAACTTCAAGTAATTAGAGCTTATGTCGCTT
chr02	29894515	chr02	39.01	AAATGTTCAAATTCAACCCTCTACTTTTGATTGTTTCTTAAAATTCCCCATGGTTAAACTTCAAGTAATTAGAGCTTATGTCGCTTATGTCAAGTAAGACT
chr02	29914669	chr02	39.01	CTGCTTCCACCGTCCACATTTTTACTTGTTCACTATACTATACTATTTTGGGATGTCCAACAATATTTATTCAGTTTATAAAATCAATGAATAATTTATCA
chr02	29914670	chr02	39.01	TGCTTCCACCGTCCACATTTTTACTTGTTCACTATACTATACTATTTTGGGATGTCCAACAATATTTATTCAGTTTATAAAATCAATGAATAATTTATCAT
chr02	29914675	chr02	39.01	CCACCGTCCACATTTTTACTTGTTCACTATACTATACTATTTTGGGATGTCCAACAATATTTATTCAGTTTATAAAATCAATGAATAATTTATCATTATGT
chr02	29914684	chr02	39.01	ACATTTTTACTTGTTCACTATACTATACTATTTTGGGATGTCCAACAATATTTATTCAGTTTATAAAATCAATGAATAATTTATCATTATGTGTCTATTTT
chr02	29914702	chr02	39.01	TATACTATACTATTTTGGGATGTCCAACAATATTTATTCAGTTTATAAAATCAATGAATAATTTATCATTATGTGTCTATTTTCCCCTTGCTATTAAATAT
chr02	29927499	chr02	39.01	TAGGGATTAAACAATAGTAGTGGAAGGACAATACTTCATAATTCATCAAAACCCCACCAAAATAATAATTAGGGTGGTGAGCCAACAACTCGAAGATCTGA
chr02	29929145	chr02	39.01	AATAACATATTAGAATTGATTTCATCATTTCAAGTGAAATAACTCAAAGGTTTACAAAATAAAAGTGAACATTATACTTCATAGTTAGCTCTTCACTTACA
chr02	29854048	chr02	39.01	CATAAGTTTCGCTGAAATAATGCATGCGGATTGTATTGCACTGACTAAGTGAAGGCTTCAAAAGAAAAAACTGATAGAATCAAGTCCTATTAAGGAGTGCA
chr02	29854040	chr02	39.01	CAGAATAACATAAGTTTCGCTGAAATAATGCATGCGGATTGTATTGCACTGACTAAGTGAAGGCTTCAAAAGAAAAAACTGATAGAATCAAGTCCTATTAA
chr02	29854024	chr02	39.01	ATTTGAAAAAAAAGAGCAGAATAACATAAGTTTCGCTGAAATAATGCATGCGGATTGTATTGCACTGACTAAGTGAAGGCTTCAAAAGAAAAAACTGATAG
chr02	29854019	chr02	39.01	TATGTATTTGAAAAAAAAGAGCAGAATAACATAAGTTTCGCTGAAATAATGCATGCGGATTGTATTGCACTGACTAAGTGAAGGCTTCAAAAGAAAAAACT
chr02	29844520	chr02	39.01	AATAGACAGGTGAATCGTGATTGCCTTGTCCCCCTACTATCGATGTTATAAGAAAATATTCAACAATATTATATTTCTTAATATTATTTTAGTATAAGAAA
chr02	29784644	chr02	39.01	ACAATAAATTTCAGTATTGGTGTTATATATATCTTGTTAGCAATCTAAATCCCCATACAGTACGTACACATGGTTCTGACATAGGCGGATCCATAATTCAA
chr02	31740161	chr02	40.89	ATCATCATGTCACTTAAATCTGATTGGTCGAGAGAATTAAGCATGTCCTTGTCACAACTCATACATTCTACAACTACAAATAGGATTTCAAGAAAATCCAA
chr02	31677983	chr02	40.89	GTATTTGTTTTTTGTTATTTTTACAGTCATTGCTCCTTGTGGAGGATTCACTCCCAGTTCCACCCAAAACTATAGTTGAGAAATTTATTTACAATAAAGCA
chr02	30525307	chr02	41.56	TGTTGTAATTAATGCAAAGCAAATAGCAAGCCTCTCACTATGATATGACAGCAGAACTTCCTTCTGTTCATCCTCTACGTCATGCAATGCATATCTTTGAT
chr02	33044157	chr02	43.2	GGATCAAGATATTAGTTGATGGTGAGATTCGAATCTAATAAGTTTATTTTTTTTCTAAACTATGTTAAAGTATTTGTCTATTTCATTTTAAAACTTAAACT
chr02	33044145	chr02	43.2	GAACTAATTTTTGGATCAAGATATTAGTTGATGGTGAGATTCGAATCTAATAAGTTTATTTTTTTTCTAAACTATGTTAAAGTATTTGTCTATTTCATTTT
chr02	31710459	chr02	43.23	GGTCATATTCTGTAGATTCACCTGTTGGTTGATCTTGTTGCCACTTTCATATGTTGTGTTTTCTTACTAGTTGAGTCTGACCATGTTAGAGTTAGTTGACA
chr02	33044043	chr02	43.3	TCAGTACGTAGTTACAACATATAATCATATTTAAAAGTTTAAATTATTAAGTGAATTTCATTTTTATTATTATTTAATTATGTTTTTCATATCCGCACATT
chr02	31049428	chr02	43.72	TTTGAAAACCTCTGGAGCTACATATCGGCCTATTTATTTCCAACAAAACACAAGGCAAAAAGGAAACAGGTTAAGAGATTTCCAATTATTAATCAACAGAA
chr02	31049448	chr02	43.72	CATATCGGCCTATTTATTTCCAACAAAACACAAGGCAAAAAGGAAACAGGTTAAGAGATTTCCAATTATTAATCAACAGAAATGGATCAGTAGAAGCAATT
chr02	31049463	chr02	43.72	ATTTCCAACAAAACACAAGGCAAAAAGGAAACAGGTTAAGAGATTTCCAATTATTAATCAACAGAAATGGATCAGTAGAAGCAATTGTGGCACCATGCAAT
chr02	31049803	chr02	43.72	ACTTTCAGGTGTCCCGTATCATCCCTCAAAATATTTCTGTTATGTCACGTTAAAATATTAAAACAATAGGATGAAGAAACTCAATTTTGAAAGAGGGGAAC
chr02	31067847	chr02	43.72	AAGTTGGAGCAAGATTCTTCAGTTCTTGCTTTTGGACCATCTCTGGAACTTTTGGGTTCACCCAAAGTCCTGCTATAATCTGTATATTCAAAATATTCAGA
chr02	31211208	chr02	43.72	TGAAAATGCTCACAATTTCTGAAGGTTTTTCAAACTCTCAAAACTAGGAAATATTCCAGTGAAGTTGTTACCGCTCAGCCTACTGCATTGATACCAAAAGG
chr02	31348452	chr02	43.72	ATATTTCAATAAATTGTTCCATATATATATATTTTTTAAAATTTATATTGTGTATGAGTACGAAATTTTTTAAGGATGAATTTTCTGTTATTTAGTGTTTA
chr02	31348697	chr02	43.72	TAATTTTTATATCAAGATAAAACTTTTATAAGATATTAGATACTTTCATTAGACAACAACTATATGATATGTATGCGGCAAAAAATAGGAGAAGACTACAA
chr02	31488616	chr02	43.72	TTTCTTCTTCCCCCAAATGTTCTGTCAAAGCTTGTGATTTTTGTCATTTTCCTTGAAAAAACTTCATTTTATAGGATTTTTATGTATTACATTTGACTGCA
chr02	31484308	chr02	43.72	GAACTCGTTTGAATTGACTTAAAAAAGTAATTTTTAATAGTGCTAAAAAATGATGAGATGATTTTTTTTATAGCTAGTATAAGAATAGATTTAAATGGTAA
chr02	31575884	chr02	43.72	GCTCCAAATCCTCTTTAGTCCAAGCCTCATCACTTTAATTTCTATCTTTTTTTTTTATTTGATCTTCATATTGACTTTTAAGGCTTATACTGAAATTTCTA
chr02	31348808	chr02	43.72	ATAAGGTAGACACTTAAAGAAATTAAATATTTTCACCAAAGGTTATGTTGTTCATCTATTAACATTAAATTATGCTACTGAAATATATATATACACTCAAA
chr02	31364434	chr02	43.72	GGGAAATTTAATGTGGTTATGAGACTACTGCCATTAGTGTGCTCGTGATAGTATTTTCTTATGGTAAAACCTCAAAATGATTAATGGAGCACCTCAATTGA
chr02	31378151	chr02	43.72	TAAGTCTCAATATAATGGCTATATATATGTAACTGCTAAAGTCAACCATGTTACATCTTTGCTAAAGTGAACCATAAATTTTTATTTTTACCCGTTAAACA
chr02	31473037	chr02	43.72	TTGCAATAAGAAATTTAATTTAATTAAAAATAAATGAATTATTAATAATTAAGACAAACTTTATGAATAATTTTGTTAAACCTATTATTCAGTCACAAAGT
chr02	31930196	chr02	44.05	AAGCTCTCTTCTTGACACGTTCCATTATATTTTCCTAATACCAAACACTTCCTCTTCACCTTTCTCAATTTCCTCACCCCACACTCAAATTGCCTCTTCAC
chr02	32506996	chr02	44.24	GTGTCACTGCAAATATTTCTGGCAGCTGGATCCCCACATATTGTAGAAAACATAAAGTTGTATGGCCCTCCCGCCCCACAACATGCAACTAAAGCTCCTTT
chr02	32007219	chr02	44.89	TATATGCATTTATCTTATGAATAATAGATTTTAATTTTTTTTTGTATTTTTACCTTTTCATATTTTTAATCACTTAATGATAATTTAAACCGGCCCAAAAA
chr02	32488524	chr02	44.99	TGAAAATCATGTTCATTGAGAAATCAATAAATAAAGCATCTGAATATTATTGACATCTCCTAATATTTTTTTAAAAAAATTAATCAAAATTTGATAATTTA
chr02	34769942	chr02	45.09	TTTGAAATGGAAACTACAATAAAATATTGATGTGAATAAGCAGGACATAGCAAAATGTATCATTGAGCAAGACATAAATACTTCAACCTTTGGACTACTAA
chr02	34769953	chr02	45.09	AACTACAATAAAATATTGATGTGAATAAGCAGGACATAGCAAAATGTATCATTGAGCAAGACATAAATACTTCAACCTTTGGACTACTAAGATATCATAAG
chr02	34770000	chr02	45.09	ATCATTGAGCAAGACATAAATACTTCAACCTTTGGACTACTAAGATATCATAAGACTGTTGACAACAAAGTAAACATACCTTACAAATGGAAGCATTCAGA
chr02	32178669	chr02	45.33	TCCTTTGAATTTTTGCCCTTCTCTTCATTTTAAATAAAGTTTGATTATACATTTGGTTGGTTTTTGAAAAGTTTCTTGAAGATGAGTTTAAGTTTTAAAAA
chr02	32185019	chr02	45.33	AATATGGTGGTTCTAGCATTCAACATTAATATATTGGGTTTAAGGAATTGGCACCTTTAAATTTGTTATTAGTGAAGAATCTTTCTTTTTCTTTTCCTGTG
chr02	33040982	chr02	45.33	TGGCGTGAAGATGAAGGGGTGGGGTGGCGTGGGGCTGGGGTTTATTTTTACTCAAACACGCCTTTTTTATTTTGTATTTTATTTTATTTTCATGTCAGTTT
chr02	32871981	chr02	45.33	CATATATAGTGACCTAACTTTCAAATTATATACCATATGGATTAATTCAGTTAAGGGTTGAAAAACATGACTCATTTTAGTTACAAGTTTAAGTCAGGCAA
chr02	32871948	chr02	45.33	TAAATACACGTCCAACACAACAATTTTCATCCACATATATAGTGACCTAACTTTCAAATTATATACCATATGGATTAATTCAGTTAAGGGTTGAAAAACAT
chr02	32807783	chr02	45.33	ACTTGGTCAATGATGGGCCTGTCACGATGCATCTTGACTCAGCGCAACCGTCAAAATGAAACTGAAGCAATCGAGGAAGTGATTCTTAGCACTTGTGTTGT
chr02	33043777	chr02	45.52	TAATATTTAATTTTTAATAATTAACTCTATTTTAAAATTTTGATCTAACTGTATAATTATATTTGTGTAATCAAATAGTACGCATGCAGTTACACTATGAC
chr02	32904918	chr02	46.17	CTAAAGAAAAACCGACATGCCTTTTGATAGGGGTATGGTTTGATTGTGGTGGAAATCACTCCTCAGCTCGCACCCTAAGAGTTTGTCACTGCTCTTCAGAC
chr02	33045651	chr02	46.53	GTAGAATATTTAAGGATTTTTTTAAAAAAAATCTACCCCAAATATAGGGACAGTGTTTTAAAATTTCTCTGCCACGATTTCTTTCACCATCTTATTTATTA
chr02	32086555	chr02	46.79	AAAACACAGAACTATGGCTAAGCAAAATAAATAGCAATGTTATGAGCTCTTATGCCACTCAGACAAATTATTAAATAAGGACCTCAGAAATTGACAGAAGT
chr02	34832850	chr02	48.31	TAATAGAGTAAAGGAAAAATGAACTATTATATGAGCATAATTATACGATACAAGTACTTGTACTAAATTATTAACAATTACATTAATGTGTACATGTTTTG
chr02	35422998	chr02	49.12	TTCTAGTATCTTCAACTGGTGCTTTAGTATCAATGTTGCCAATTCATGTAATAAAATCTTCCTCAATATCAGACTCTACTGATGTAGTAGCTGTATCAGGC
chr02	35424783	chr02	49.12	CATTCCAGTTTGATAAGGACCTGGTGTTCCAGTTTGATAAAGACCTGATTATGCAGGTTTTCTCTTGCTCTTTAAGTCTTGATGGATATCCAACCAACCTA
chr02	35424968	chr02	49.12	CCTCTTCCAGCTAACAATGTGAGTGGTTCCTTGTTGGATTCTACCACACCAAGTATACGTTGACTCTCCTCTTGCACTACAGTAGAATAGGCTTGATTTAA
chr02	35424788	chr02	49.12	CAGTTTGATAAGGACCTGGTGTTCCAGTTTGATAAAGACCTGATTATGCAGGTTTTCTCTTGCTCTTTAAGTCTTGATGGATATCCAACCAACCTATAACA
chr02	35140416	chr02	51.5	TTGTTTGGAGTAACATTTTGACAAAAAGAATGAAAAGATTAAAAGAGAGAGAATTTGAAGGTTACCCATAATTTCTTTTTCTTTTGGAATAGAAATTGCTT
chr02	35548981	chr02	51.97	AGTAATTAGTAACATATGATATGTTGCTTCATCAATATTTTGAAAGAAAAAACAAGAGCTCACACGAGCTCTTTTTTGGATACAATATTTCGAAAACATGA
chr02	36485898	chr02	56.82	ATCCAGGAATAATCACCATCTGTAGATTAGTAGTCCAACAGTTGAGATATAATTTACATCCTCATTAGACTTCCTCTGATGTTGAAGGAATTAGTTTCTTA
chr02	36473880	chr02	56.82	ATCAAAATAGAATTAATTAAATTTCTTGTTTTATCCTTAAAATTATTTTTCTGAAACGGTAAATATCGTCAAGTTCTAAGAAAATCTTTTTCTTTACACGT
chr02	36473856	chr02	56.82	TCATTTATTTTTGTCAATTTACAAATCAAAATAGAATTAATTAAATTTCTTGTTTTATCCTTAAAATTATTTTTCTGAAACGGTAAATATCGTCAAGTTCT
chr02	36405799	chr02	56.84	GAGAATATCCGGCTATCTCCTACGGATATGATTTCTTCATTCTTAATTGCATATCTCAAAATTCATAATAAAATCAAATTAATCGAAAAGAATGGAACAGA
chr02	36405800	chr02	56.84	AGAATATCCGGCTATCTCCTACGGATATGATTTCTTCATTCTTAATTGCATATCTCAAAATTCATAATAAAATCAAATTAATCGAAAAGAATGGAACAGAG
chr02	36458036	chr02	56.84	CTTTCATGAATAATTACGGTTCATTGTGTTTAGGTGATCTAGTTTACAAATAGCCATCAAATGTATAAATTTTGTATGATTAAGCATAATCTATATAATTA
chr02	36466658	chr02	56.84	GTTCAATGCCAAAACATCCTTAAGCTTATGTTCCAACGTATTTGTTTGATGTAATTCAGGTGTACCCCAAGTCATGGACCGCAATATACATGGCATTGGAC
chr02	36507408	chr02	56.84	AAACACTAAACCGTTCTTTTTAGAAACATACGTACCTTGTAAGCCCAATATAAGTATGAGGTTTCATCATTAATTTCTTTACCAAGGCGAGCAATGACTTT
chr02	36814269	chr02	57.89	CCACTACAAGCATAATCATAGGTATATTAGTGATACAGTTATACATAATAGGTATGCTAGCCTCTCTATCTCCCCTTTAAAGTTCTATCTATCAAATCATC
chr02	36616791	chr02	57.9	GAGAAAAGAAGAAAAATAAAAATGAAAAGAATTTGATAGCCACTTTTTAAAGTTAATTAAAATAAAATGAAGGCTACAATTAATAATCAATATTAATTTTT
chr02	36616855	chr02	57.9	AAATGAAGGCTACAATTAATAATCAATATTAATTTTTTGTTTATTATTAAGGGATCATATCAAGTATTGGATCCTACCAAATTAATTTTTTCAAAAATTAG
chr02	36709633	chr02	57.98	ACATAATAAAGGTGGAATTTATAAAATTAGTTGGGGCAGTAAGGTGAATAAAATAAATGGGGCACTTCAGAATTACAATCACTATACTATATATGAAGGAA
chr02	37580048	chr02	59.06	TTTGGTTACCATATAATGGTCTCCAACAGTAAAATTGGACAGATTATTCTGAAGTTTTTGGCCATAAAATCCAGGATCTAATGAATCAATGTCATCCCAAT
chr02	37485076	chr02	59.71	ATTTCTTTTTGTTTTTTATTCTCATTACATAATTCATTTAAGTTGTAAGGCGTGCCTCTATTTTCTTCAGGAGGGCATAAGGAGGACCATTGAATCCTATC
chr02	37602997	chr02	60.13	ACATCACAGAAAGCATTAAGAAGTAAGAGCATCAGGAACACAAAACAAGCGTTTATTTATAACTCTAGCACTGAAATTCTAGAAATTAATCCACCAAGTAT
chr02	37832701	chr02	60.13	TCTCTCTATTTTTTCCAAATTTTTATTTGGAATGTGAGACATATGACTTAGGTAAAATTTAATAGCTAAGATTTAGTTGATTAAAATAAAATTATAATAAT
chr02	37832752	chr02	60.13	GTAAAATTTAATAGCTAAGATTTAGTTGATTAAAATAAAATTATAATAATGATTTAGATAATTTATATTTCATAAAAAAAAGATAGCAATACCATGATTAT
chr02	37339672	chr02	60.55	TCATGATTGGATACTGTAAAAGCATGATGCAACAAATCGACGAGCTAAGGGCTAAGTTCATTTTTCTTCTGTTTTCAGAATGAGTAAAGAGTATCCATTTC
chr02	38406121	chr02	61.05	AGAATGATATGAAACAATTATTTTCAGTAGGCTTGGTTTTAGTTTTGCTCGTACGATTCATCTTAGGATATGAAAAAGTAGTTATATTGTTGTCATTTACC
chr02	38406124	chr02	61.05	ATGATATGAAACAATTATTTTCAGTAGGCTTGGTTTTAGTTTTGCTCGTACGATTCATCTTAGGATATGAAAAAGTAGTTATATTGTTGTCATTTACCATG
chr02	40249564	chr02	61.07	CCCTACTGTTATCCACCCCTCACCCCCAATTTCCTTCAACCCACCACCATTAATATTTGTGGAGCAAATCTTTTAATTACTTTATAAATATAAGAAAAATA
chr02	40311862	chr02	61.07	ATAAGTCGACATTTATCAAGAGGGGATTATCCCCTTAAATAAATGATAATTAGATACTAATAGCTCTATGCAGCTCAAAAAACATTACTAAAACTTAAGTA
chr02	40353235	chr02	61.07	CGCTCTTTTTGAAAATCAATTTGACTAATTTTCAAAGTTAAATTAGATTATATTAATTTGATATTTTAAATAAAAAATTTAGATATTCAAAACTATAAATT
chr02	40512581	chr02	61.07	AAAGAAGAGTGTCTTTCAGCTATTTCCTTTCGGCATGTTTCAAATGTTCATTTCAGAAAGACAAGTTTATAAACTCAAAAATCTAGTGAGAGTAATCAACT
chr02	40605796	chr02	61.07	ATGAACTTCAGGTGATAAACCCACTTAAATTGAACTGACAAAAGAGTTCGATGAATTCAGAAGCTTGAGTACCAGATCATGCAAAAACCATTTCCTCTATA
chr02	40838831	chr02	61.07	TTACGACATATAAAGTATATATTTCGATTAGTTTGAGTTATTGAGCTAAAACTAATAACTTCATTCCTTACAAACACCAATATTTTATCTTTTCTTGCATA
chr02	40233817	chr02	61.08	TAAAAATCACAAACGTTAAGATCCCGTTATAACGGAACCCTAGAGCTATAAGATCCCGTTAGCCAGACAGATGCCAGATTTGTTATCTTGCGTCAAATAAG
chr02	38662698	chr02	61.16	GTGAAGCAGAAACTTCCTTTTCAAATTGGCAATCTCAAAAAAGGAGCGGAACTTTAGCAACTTATAGTCTTGGAATAATATATGTTGGAATGACTGACATG
chr02	40369982	chr02	61.31	CTGCTTATTGAACGGATAATTCCGCTTAATGATTTATGCAATTTTTAATAGCCCAATACTAATAAGTAAATTTTACACTTTGCTTATCAATTACGATTTAA
chr02	38384402	chr02	61.43	TTTCTCTAACGTTTGATTATGTAATTTGTACTTTTTAATGTTTACTATATTACAAAATCTTCTCTTATTTAAATTTATTACTACTAATATACAACTAATGT
chr02	38384404	chr02	61.43	TCTCTAACGTTTGATTATGTAATTTGTACTTTTTAATGTTTACTATATTACAAAATCTTCTCTTATTTAAATTTATTACTACTAATATACAACTAATGTCT
chr02	38058264	chr02	61.59	GTTATATTGTACTCTCCGTCATAATATCCACTATCCTTTATACCTGTGCTAAAAAAAAACTGAGATCACTTATCGAAGTCAAATTTTACAAGTCGGGTTTG
chr02	38362952	chr02	62.31	AAATTTGTCTAAAACATTCTATGTAGCTACTATATAAGAGCGAAATTTATCCTATACACAAGATAAGTGACTGTGATTCCTTATCGTAAAAATTAGGGAAT
chr02	38468338	chr02	62.31	TAGTAGCACAACTCATCAAGAAAATCAATCTGATTCTCGTTTGCTATGGAGACTGCGGTTTGTATATTTTTATTTATTTGTATATTTCATTTGCGAATATA
chr02	38921052	chr02	62.62	TATAGGATTAGTGATTCATACAACTGACCCCAACTTGACTGGATTGAGGCATAGTTATTGTTTTGATTCCTTCTATCGTTTTATAACCAAAATCTCATGCA
chr02	41271214	chr02	62.92	TAATTAAGCTTTTTCTAAAAAATAGCTACACAATTATTTTGGCCCGAAATCTCAAATAAAAAAACTTTTACATTATACATCACATACAGAAAAGAGAAAAA
chr02	41494833	chr02	63.44	ATACTAAAAATATTTACACCAGAAATATACCATAATTATGCATTGCTTTTTAAAATACCAGCATCTCTTTCTATATAAATAGTGAGTTTGTGAGTGTTTAT
chr02	41449516	chr02	63.44	AAGTATCATTGCAAGTTAGAGCTGGTTGATAAAGCCAGTTTTCAAAACAGATGTCAATTTTCTTCCTACTAATAATGTTATTATACAAGTAACAAACTGAA
chr02	41305161	chr02	63.44	TGCGCACGGAATCTTCAATTTTTTTAAATGAAATTTATATATTTGTAAACTATGTAAAAAATATTATAAGTCACAATAAATGATAATTCAAAATGTTTAAA
chr02	41317681	chr02	63.44	TGATTTACTTTTTTTTGTTGCCTCTCTTTCTTCATAAGCCGTATAGAGTTGCAATCTACTCAACAAGGTTTGGGACAAAAAACTTGAGACGTAGGATTAAT
chr02	41327170	chr02	63.44	GCACAAAAGTTAATTAAACATTGCTTTTAAATAGCTACATAAATTTTTTACACGATTGTTGCACAAACATTAATTAAACACCCTTAATTTCATTGATCTTC
chr02	41330054	chr02	63.44	GTGTCTTGAATGAAGGTTCTAGAGTACTAAAAATGTGTGAAAGTTTTGTTATAATTATACTTAACATACAAGTTAAGAGATTATTACAGTTTATTTATATT
chr02	41335985	chr02	63.44	GCTTTAAAACTCATTTAGAGTTGCAATTTACTCGACGAGATTTGAGACCCGGCAACTTGAATCACAAGATTAGTGCCACAATTGATCGTCAGAATCAGAAA
chr02	41532510	chr02	63.44	TTTTGCAAATTGCTCATTGTAAACTTTGGAAAATAACTGTTAAAGAAAGTCAAGGGGAAAGATAAATAACAAGAAGAGACAATATTATTTATATTATATGT
chr02	39105474	chr02	63.5	TAAAAACTAATATGAGTGTTTTATCACAATATTTTATTAATTGATATATAATTTTAAATTTTGCGAAAAAAATTGAGAATTAAGTAATTTATTATGAGAGT
chr02	41484264	chr02	64.22	TAATGTTAGACATTCCAAAATAGTATAACGGACAATATCCAAAAATAGAAGAGTGAACAACAATTTGTATAAATCCAAAATTGAAGGACATAAATATGAAG
chr02	41484241	chr02	64.22	ATTGATTTCATAAAGTGGATAAGTAATGTTAGACATTCCAAAATAGTATAACGGACAATATCCAAAAATAGAAGAGTGAACAACAATTTGTATAAATCCAA
chr02	38997985	chr02	64.52	CTTCCAAATCTATGCACCAGTGTAATCTGAACCGTCAAGATGAATCTAGAAATTGTACCAGATAGGAGTTTTGACTGTAAAAATTGAGAACATAGTTATCC
chr02	37874241	chr02	65.34	AATAATTGAAAAAAGAAATCAACAAGCACAACCGTAATCACAAGTACAATAATTCTCTGGATCATACATTATTTTTTTCCGAATATTGTTAAATCTGAAAA
chr02	37830339	chr02	65.34	AATAAGAGTAAAATAAAAATGTCATTAAATAGTTTAATTGAATATATTTTAATTCTTAAATTTTTTGTTTACAAATAAAAATTTAATGTGAACAAATTTTA
chr02	37706206	chr02	65.34	TACATTAATTCGATATTTTAAACAAAAACTTTAAATATTCAAAAACTATACAAAAAGTACTATAATTACAATTTTTTGCATATCAATATGATAAAAAAATA
chr02	37703650	chr02	65.34	TATGCATAAAACACCAGTAACAAGCGTGTGTACTATATAATAGAGAGAGAGAGATACCAATTAAGATAAGAATTACAGACACCAAGGAGAACAAAGTGTAT
chr02	41809958	chr02	65.38	TGTATAGGTTATTTATATTTCACGGTATTAAGAAGATTTCAAATATAGCGCTACATATTATTTTACATGGTTCAATATATTATTTAAATGAACAAAAAAAA
chr02	41435044	chr02	65.73	TAATCAGAACTTTGACGGTACTTGTCATTTGCAAATTTTTTTTAATTTGTAGTGCCTTTTGTCATAAGGGACTCCTTTTGTCCACTCTGCGCATATGAGGG
chr02	38332631	chr02	66.26	ATACAAATTATAGAAGAAGATCTCTTATTAATTTGACATGCAATTTCTAAGAGGAGTAAGAGAAGAAATACAAACACAATTGTCTAATGTATGGTTTAGAG
chr02	38957312	chr02	66.4	CAGCTTATAACACCAAGAGTACTCTTATATCCTTGGATATATAGTATACACATTTTTGAGTACTAGTATATACAAATAAGTTTCCTTTAGGATTGTATGAT
chr02	38849468	chr02	66.4	CCAAACAGAAATTCTAGAATCTCATATAACCTTATTTTTAGAAGGACCAATGCATATAATTTTAAGAACATAAATCTAACAAACTTCCTACAAATACAAAA
chr02	38849432	chr02	66.4	GATTACATCCTTTCCCAGAATTATCAACTCTGCTGACCAAACAGAAATTCTAGAATCTCATATAACCTTATTTTTAGAAGGACCAATGCATATAATTTTAA
chr02	38849427	chr02	66.4	GAAATGATTACATCCTTTCCCAGAATTATCAACTCTGCTGACCAAACAGAAATTCTAGAATCTCATATAACCTTATTTTTAGAAGGACCAATGCATATAAT
chr02	38840778	chr02	66.4	TTAAGTTTTATTATGGCTGCTTGATGCAGCACATTATGATTTCTCAAGTACTTCGTTTGTTGAATTGGAAGTATCATTTGAGGTGCGTTGAGTTGGAGAAG
chr02	38828534	chr02	66.4	TTTAGATAATCAGACTGAAATCAGTTGTAGAAATTGATATTCAACCACTATAAACTTAGGACCAAACTTTTAGATGTTCCAAATTGTGTGAATTTTGATGA
chr02	38819277	chr02	66.4	CAAATACCTGAATAAGAGTCCAATTTATCATGTTACGCATAGAGTTTTAGTGTATAGAAAGAGTTTCTGCAGTATTTGTCAAAATCTGATGTCAGGTTAAG
chr02	41967485	chr02	66.55	TCTTATGTTCCTCTGCCTTACCATTCTCGTGGATGAGGAATTTCACTCGGGCTTCGGCCAACATCCCATAAATGTTATCTGATATGTGAGTAAAGGACAGT
chr02	42109168	chr02	66.55	TTTATGTCATGTTATTACAGAAGAATAACCCATCAAAATGGGACAAGAAGATCGTCGATGCCATGACAAAGGATTTTTCGTGGGATGCAAAGTGCTGCGAC
chr02	42257735	chr02	66.55	TAATGGTTGTCTACTTCTCTTTCTTTTTCTAATATTTGTCCACTTCTGGTTGTTGAGCAAGATAAACTGTTGCAATGTATAAATAATGTATATATAATTAT
chr02	42156972	chr02	66.55	AACTTGTGGTCCAAAATGAATGATAGAAATTTATGGGATTGTAAATCATTTCATTAATGATAAAATAAATATTTTACTGTTAATATATCATTCTTTTTTAA
chr02	42138222	chr02	66.55	ATTGCTTGTATTAAGTATTATTTTAAAGTTGTGAAAGTATATATTCCGTCGAAAAAATAACGTAAGTTTAAGGAAAGTACTATTCCAAACAAGCAAGTGAA
chr02	42103321	chr02	67.5	TTTAAACACAGTATTTGCAGCATTCTATAGTTTGCTTCAAATGCAGAGAGCTTCTCTTAATATGTTGTATGAATCTCAATTAGTTGCCTTTGCATCTTCTC
chr02	38362958	chr02	69.52	GTCTAAAACATTCTATGTAGCTACTATATAAGAGCGAAATTTATCCTATACACAAGATAAGTGACTGTGATTCCTTATCGTAAAAATTAGGGAATACCGAT
chr02	43314751	chr02	74.26	AATTCTAACATATGATATATCAAGTATTCGTAAGGTAAAAATATAACAGGACCAACATAATATGGAAAAAATCTACATGTATCAGTCATACAAAATTATAA
chr02	39639008	chr02	75.53	CAAGCAACTCAGTGTTTTATTTTATACTAATATATACTAGTGAATTTGATCGCGCTTCGCGCGATTATAAAATACCTCATTAATTTAATAAAATATTTTTT
chr02	39576157	chr02	75.53	TCGTTGGTGACCTTCATAATGAAATGGGTATATTTACAATAAAGTGCTTGGACGAAAATTGCAGGCTCATGAGTTACAGATATGATATTCTGCATCGAGGG
chr02	39575714	chr02	75.53	AGCTGCATCTTTCTTTTAATCTATTACATCCCACTAAAGAATCTCTTGGCCGAAATGGCACAAACACATGACTTAAATAAACCTGCTCCTCTCCCAGTGTT
chr02	39566995	chr02	75.53	GGCATGTTCTGTCCTGACTCAAGTTCAGCCAATTGGGTTGGCAAATCAAATATGGAACTGAGTTGTCTTCTCTACAACTGACTCAGTGGATACTTATGAGC
chr02	43766605	chr02	85.74	GTATCCATCAACTGAAAGTGGTATAGCATGTAATATCAAAAACTATTGGGATTTCTAGTAATTAGACTCTAAACTACTGAGATTTATGTAGTTTACTTTTC
chr02	43846729	chr02	85.75	ACTTTTTTATTTATTTTTTGATATTGCTAAAATTAGTAATAGGAACAAATTATTTGAATTAAACATTTTATTATGCTCAAATCTTTTAATTTTTTAGGGAG
chr02	43990653	chr02	88.83	GTGAATTCCAAAATAAAACTTTAATTTTTTTAAAATAATGTATACACAGTTAAAAACTATATAAATAATGTTAAGTCACAACAATAAACAATTTAAAATAT
chr02	43990642	chr02	88.83	TAGTGTTCAATGTGAATTCCAAAATAAAACTTTAATTTTTTTAAAATAATGTATACACAGTTAAAAACTATATAAATAATGTTAAGTCACAACAATAAACA
chr02	43990633	chr02	88.83	CAAACTAATTAGTGTTCAATGTGAATTCCAAAATAAAACTTTAATTTTTTTAAAATAATGTATACACAGTTAAAAACTATATAAATAATGTTAAGTCACAA
chr02	43990803	chr02	88.83	TCACACAGTAATAACATAAAGACAAACAAATGAAGTAGAATGAGAACAATCAGATCTCAACTTCAAACACCTGTAAAGACAAAAAAAATATTAATTGATAT
chr02	44181251	chr02	88.83	TTTTTTCTCCCCAATTTTTTTCTTTAATTTAATAGCCTTTTGATCACTAATTACGTATGTCCTTTTTAGTATACGAGTTAACACATTTAACTTTTTAGTTT
chr02	43990551	chr02	88.83	TCTTAATCCCGATTCAATGTAGAAAATAACACTTATATTTTTGAAGTGTTAATTTATATAGTTTGATTTAGAGTACATGAAACAAACTAATTAGTGTTCAA
chr02	44181254	chr02	88.83	TTTCTCCCCAATTTTTTTCTTTAATTTAATAGCCTTTTGATCACTAATTACGTATGTCCTTTTTAGTATACGAGTTAACACATTTAACTTTTTAGTTTTCG
chr02	44232305	chr02	88.83	TTAATACTCCTGAAAGGCGAAAAAGAAAAATAATCATTTTGACCTTAAAATTAATCATTCTTAAAAGTAATTAATTGAGATTAATTAGCATAGAATACCTA
chr02	44271721	chr02	88.83	GCTAAAGGGAAAGGTAAAAATGGACAGTCACATTCAGAGAATCAATTTATCTGGGTCACTAAAAAAATAGATTTAGATAGGATAGAGCATGAAGTAACAGA
chr02	44254749	chr02	89.01	ATAATTATCATCATCTCATTTTTAATTATTTCCTGAGGTGGCAATTAGTTGTGGATTAAACTTATAGACTTTTTTTCATCACTAATACGTACGTGCTTAGC
chr02	46236840	chr02	92.56	TTAATTTAGCATTTTCTACCTAAGGGATGAGACAAACATATAAACACGTTTAAGCTTATCTATGCTTTTGGTAAACACTCAAAATACACGAGTCAAAATCA
chr02	44720503	chr02	95.26	GATAACAATTTAATTTTAAAATATTTATTCTCCACAAATATCTATAACTTATTTTAGATTATTCAGTTTCAAAAGTCTATTTCTTTCATAAATTTTATATA
chr02	44747068	chr02	95.26	AAAATTTTTATTGTTTGTTTTGCTATTCTTTTGTTATCTTTTTCTTAAGTAAAAATTTATGACTTCTAATAATAATTATGAGTAATTAATTATAATATATG
chr02	44911982	chr02	95.26	TATTTCTCTACCTGCAGTGTAGTGCCAGAAAGCTGGCTTTTTTTGGTATCTCTTTGTTGCTTGACACTTCTTGGAATGCCAGATTTATATACGTTAAAAAA
chr02	44757453	chr02	95.26	AAACGAATCAACTCTCAAAGTAAGGGTCCTAATAACTTCTTCCTTTCAATTCAAATCGACGTTATAGTTTATATATATATGGTAGAACTAACGAGATCTTT
chr02	44747078	chr02	95.26	TTGTTTGTTTTGCTATTCTTTTGTTATCTTTTTCTTAAGTAAAAATTTATGACTTCTAATAATAATTATGAGTAATTAATTATAATATATGTGTACTTGAC
chr02	45522536	chr02	95.42	CAAACTGCATAGAAGATGCAAATAACATTAGATAAATTCGGTGTAACGAGTTTGACTGAGAGGGTGTTGGGAGGGAGAATTGAAAATGACACAAAGTTCGT
chr02	45330604	chr02	96.43	TGTTCAGTCTCTCTAAGAAGCTCACTTCTTTATCAGTGTAGATTTAGACCGTTTCAAAGTGCTGTTGAGTAATTTCTTTTACATTCATACATATGTAGTAC
chr02	47762234	chr02	100.87	TTTATTAGTCAAAAATAAGGTAAAAATATACAATATCAATATTTAGAGATGGTTAAGTGAAAGAGCATAAATGCAAACACCTATTATAAATTGTTTGGTAT
chr02	47901673	chr02	100.87	AACTTATCTAAAGTATTTTTTTTTCTTATCCTATTCTAAATTTTTATTTAGATTGTAATTTGTTATCACTGAATTAAAAGAGTATTTGCTTCCCTTGTCTA
chr02	47910003	chr02	100.87	TGCAATATTGTCCCAACTTGTTCTTGTTTTGTTTTTTAAAAATAAAAATTCTTTCTTGTTACGTACTATATTTTTGTTCCATCTAGTAACAGAGTTTAGCA
chr02	46674689	chr02	101.31	AAGAACTAGATCGGGCATGTATGTAGAGAATTTATGTGACAGCTTAGAATATAGGCTTAGTTGATTGATTGATTTGAGAATTCAAGGTTACTAACTCCATT
chr02	46705812	chr02	101.31	ATACATTTTTGGAGTCAGAAATGTTAAGAGTTTTTTAGCATCAAGACATAAAAAGATTTAATCGACGTGACGACACAGCCAACTGGAAACGTGGAATGCTG
chr02	47486053	chr02	101.31	TGTAAGAAAAATATTTTTGGAAAACTTTACCCATTTGAACATGAAAAAATATCCACGAACACGCCTAAAATGTCAATTTTTAATTTTCCTTTTATCCCAAG
chr02	46993035	chr02	104.3	AACAAAACCCCAAGGACCTATGTTATAAATCTTTTTTGTCTATATCTTTTCCTTGGTGCCCTTGTGTGTCTTTGTAAGCTAGATTTTCTAGAGCTGATAAG
chr02	46993085	chr02	104.3	CCTTGGTGCCCTTGTGTGTCTTTGTAAGCTAGATTTTCTAGAGCTGATAAGTTTTGTAAGTATCTTTGAAAGCTAAATTTTTCACCATATTTAAATTTTGT
chr02	46993111	chr02	104.3	AGCTAGATTTTCTAGAGCTGATAAGTTTTGTAAGTATCTTTGAAAGCTAAATTTTTCACCATATTTAAATTTTGTATATGGACAAGTGATCTCGCATGACA
chr02	5793070	chr02	0	GAAAGTTTTATAAAAGAAAAGTGGAAATCTAGACTTGTCTCATTAGCCATCTATTACAATCGAAGTCTCAATATAGGGTTACATCCCTTTAAAACATAGTC
chr02	7283220	chr02	1.88	GCAAGCAAAAGATATGTAGACATGGGCAATAATTTATCATCATCAAAAAGGAGGGAAATGTTGTATTTTGGGATTTTGATGATTTAACAAGCTATAAAGAA
chr02	7388201	chr02	2.44	AATTTACAAACCAACTACAACATTAGTTGGCAGAAAACTTTACCCTTCAACCTATGGTCCATATGGCTAACAAGGAACAACAATACTGAAAAATTTATAAA
chr02	5122299	chr02	2.6	TTGTTACGGCATACGACTCTTCCACTAGTATGTAGTTGTCAAAGACGTTTAGTATGAACTAAATGATGAATCAAAAGATGACAAAATTGTTCAATTTTTTT
chr02	12095728	chr02	2.94	AAAGTGGCCCACATATATCTCTATTGTTACAAAAGTGACTCACATATACCCTTTTCATCTAACGGAAGTGAAAAAATAATAATATTATATAAATTATTTTT
chr02	8996969	chr02	3.51	GCTCCAGGTTTGTACCATTAGCAATATGACATTGCACTTTCATTTCTCTTTTTATACTTTTTCGTGTCACCCACCACACAGAAGAAGGATAAAACCGAACA
chr02	7516422	chr02	3.64	CAATTCAACTGTGGAACTTAGTTCACTACCTCTACTTTTGTGTTCTACAGGGCCCTTCTATGAAGAGGCCACTGGAGCTTGGTAAAATGTATCAACGGCTT
chr02	4446241	chr02	3.64	TTAGACCATGACCTTTGGCTGGAACATGGGACATAACCTAACATTGTTGGAAGTAAATAAGAAATGTGGATGTCCTACGGTAAATTCGCATGACTTTATAT
chr02	6040488	chr02	3.65	TGTAGCTCCATGAAGGTTGTGGAAGTAGGGGTTTTCTATGGCTTAAGTTTGTTCAAGTGTTTTGGGCGTGTATATAGAAAGGTAAGAACCATCTTTTATCG
chr02	4846615	chr02	3.65	TGTTGATCTTTCAATCAAATTTGTCAAGTCTATTAAGTATTTATCTTATGGCTTTGAGACACCTAAGGATACTCATCCAAATATGATTGGTGATGTTGTAG
chr02	5543723	chr02	3.66	TTCTTAATAGAAGAAAAATTGTTTCTGCTTCCATTTAAAAATAATTTTTTGATTAGCGAAATATCTGAATTATCTAAAAAATATGTTTCTCAAAACAAGTG
chr02	8362972	chr02	3.75	AATTTTAAAATTAAAGTAGAATTCACTGTTGGATAAAGTTATGGACTTACGTTTTTTTAATCATATTTATGTATGTTATGTTGAAATTTGACATAAGAGTA
chr02	18102972	chr02	3.98	TGTAGTTCTCTAGCTCAATAACTTTTATTGAAATGGCTTAGCTAGAAAGACAAACTATTAATAGGTTCCCATGGATAATATGTGTTTTCCTTACCGTGCTT
chr02	17215489	chr02	4.11	TACAAGAATCAATAGTCATCTTCTACCACAATTTATATCCACTAACATATACATTTAATATTTTATTAATAATAAAATGTATATACACCAATAATAACTTT
chr02	11315910	chr02	4.87	AGAAATTGTTAATAAAAATAAATAAATTTATACTACAGTAAAAATTAAACTAAAACAAATTTCAATTGGCGTTATTACAAGTCATATGAACTTTTATTCAT
chr02	15942917	chr02	4.94	CTATCAAAATGATATGATTAATAGGGTATATTGATTGTTTCCTTTTTCCAGACGTCTAACCATTCCTAAGAATATTTAGTTTTTCTGTTATTAGGTTTCCT
chr02	3744461	chr02	5	TCTTTAAAAATTCTAATACAACGTGATGCATAGAATTTTCAAAGAAATTGATGCTATGAATCAATTAGAGTCAAGTGTTCTTTATTTTTACTTATAGGTGG
chr02	9099715	chr02	5.17	GTTATGAAACTATATAAAATAATAAGAATAAAGTAGGGAGAAGAGAGAAGACTTCTTATTTCTCTTGAAGGGATGATTTTACAATGAAGATAACCCCTCTA
chr02	14623786	chr02	5.39	CTGTGCTGCAATTTATCGAAATTATTGACTAGTAGAATAAGTGTTTTAGTTGAATCTTAAAATTCTGAACCACAGAGAGATTGTATTCTCAAGATCACGAA
chr02	13373091	chr02	5.5	CAGCGGTTCATCTGGTATTTCATATTTCCATGTTGAAGAAGTGCATGGGAAATCCTTCACTTATCATACCAACTGAGGATATTGAGATCAAGGATAGCTTA
chr02	17146785	chr02	5.54	ATTCACGATTCCATTGTTGAAGAAATATTCCGACCTATTCACCGTCCACATAGATCTGAAATAGTCAAACAGTTCTTGTCTCAACACAGGGTCAAATTTGT
chr02	4219462	chr02	5.63	ATGATAATTTTTATTTTTTGGTAAAACAGCTTTCATTCATTTCATACCAAAAAATAAGAAATACAACAATCAAATAGATGTTGATCACATATTTCTCAACC
chr02	6885900	chr02	5.69	TCCTAAGTTATTGATACACAAATTAGTATGTATCATGTTCAAGTTATGTAATTTGATACATAACTATTACATGTTTCGTTATTTTTTACTACTAGATACAT
chr02	9092515	chr02	5.92	GTACTCCATTTCCTTATATATTAAGTTTACCCTTTTGAGATTTATATTTTGTTTTCATGATTCGTTTAGTTATGTTGTTATCTTAATGTCGTGCATTTCCA
chr02	17388925	chr02	6.05	ATCATAAAAGGATGTTTTTGTACTGAGTGATTAATATATACGAACTGAGTGAATATACCAAGTGGATATAGATATGAACTCTGTTATGTAGGACATATAGG
chr02	17541526	chr02	6.22	AAAATTGTTTGGCTTAGCTTATTAGCAATAAATTCTTTATTTTCTTAATCATTTTTACATTGTTCTCCGTGAGATTTGACCCGATTAATAGTTGTAAAAAT
chr02	14607798	chr02	6.4	AAATATATTATCTTATCATCTTATCGAAATGAATGATTTTTCCATTGGCTCAAGTTGGGACCGGCGGAAATTATTATCTTAAAGAGATTATTAATTAGCCG
chr02	17837168	chr02	6.43	TAAACATAATTTAATTTTAACCATTATTTTTAGTCAATGATATAATTTATATTTATAGAAACGCCTATAACAATTTTAGATCACAAATTTAAAATGATGGT
chr02	14647323	chr02	6.43	AGAAATTTTTATGAAGGACTTCAACAACTTGACTATAATTGCTAGTATCTCTATAGAAAATAGAGGTAGTATACAAAAAGTATACAATGTAGATATAATTG
chr02	15772915	chr02	6.44	TGAAAAAAAAGATAAATAATTTAGTTGTATAAGAGATGTGTCACATAACTGTTTCGAAGACCATAGGTAAATAATAGTATAACTTACATAAATCCCATAGT
chr02	15296394	chr02	6.49	CAGACCTTTTTAGGGTGCTGATAAATCTGAACTCCATTTTCAAAACAAAAAGAGAGACCACATAATTCATCGGATTCTTGAAGTTGGCAAACATTTTATAA
chr02	17496166	chr02	6.69	TTTGCCGCACGAAAAAATTCATATTTTGATTGTTCTGGTGTCACTTGTCTTTTTTCAATTTTTGATGTTGCATAGTTCAAATAACAAATTATTTAAGACAC
chr02	9771718	chr02	6.72	ATTGTGCATTTACAGTGATATCAAGAAGAATATAAATAGTCATTATGCAAATATTCTTTCTTTCCAGCAATTGTCTCGTCCTACTTCAATTTTGTGGATGT
chr02	12563204	chr02	6.74	ATCTCCCCAAGGCTGGCAGAACCAAACAAACATCTTGGTGCATTCATCCGCATTCATATGACCATGTGATTGTCAGTAAGCTGCAACAATGAATGACATGT
chr02	19591651	chr02	6.81	CATTTGATCACAAAAATCAGATATTTAGACGAAAGAAAATCTACGATTCCAACTCAACCATACAAATTCAAATATATATAAATTGATTGATCATCAAGCTC
chr02	14550676	chr02	7.16	TTAACATTCATGTTAGGGAGTGTTCAAATTTCATTGAATTGTAAGATTCTCAACATCTGTAAATCACACTTGAGTATTTAAGAAGAGAAGAAACGAAAATA
chr02	13556056	chr02	7.22	CCGCATGTGTTGACTTGAGAAATCGAGAATTTGCACTGATTCTGATACAAGAAAGAGGAAGGTGTTGTGTTTTTGGACTAAGTTACGTTGTTGAAAGTCAT
chr02	15147084	chr02	7.71	TTATGACTAGTATTACACTACTAACTTATTTATCAAGCAAGAATCGATTCAGAATCAAATATGACACTAGGTATCAATTACATTTCTAAATTGGGGTGTGA
chr02	13804873	chr02	8.37	TATACTCTTCAAAGGCCTCTTCTGCTTTGGGCAACTTCCTAGAGCACTCTCTTGCAGCTCCAATAATTTTTCCCTCCCTTCATTCCCATGTGAATATCCTT
chr02	14687141	chr02	8.63	AAAGTGTAAATTTTCCATTCAGCCTGACCATCGATCTGCGGGTGAAAAGCTATGCTTAGTTTAACTTAAGTACCCAGTCCTTTCTAAAATGATGTCCAAAA
chr02	20093570	chr02	8.89	TAATTACTTTGAAAAAGATAGAACTTTTTGAAAATCTTAAGATTCATCCATTTCATAATTAATAGGGGTAAAATGAAAAACTCACTATGTCAATTATTATT
chr02	20751844	chr02	8.91	CTTGCTAATTCTGGTTTCTTCATGTTGATTGTTTTGTACTTTTTCACCTGATTATTATATTCTCTGGTTGTAGGATGGCAGTAGGTCGCACTTCATTAGCT
chr02	13779238	chr02	9.45	CGACTTAAACCTTGTACGATTGTATATTATAAATTTGAGGCTCACGAGAAGAGCGTAATGTGCAAAAACATTACTTTACATAGTAATGACCCTGTAGGTCA
chr02	23433324	chr02	9.79	CAAATTTTCTTTGTTTTTTATATCTGATTCACGCTTTCTTTGACTTGCGAATTCTTTTGCCAAAATAATGATTTTCTATATTCATTTTGTAATTAATTGCA
chr02	22388873	chr02	9.85	TAATACTTTACCAATTATATATTTTCTAAATTTTAGTATTACTTTCAGCCCGAAAGGTAGCCTCTTTATTGTGATATCTTCTTTCTTCTCAACACAAATGA
chr02	24905532	chr02	9.97	GGAATCTTTCATTCTTTCTGAATCAAATTATTGTGTACTAATGAACCTGTAATACAACCTAAATTATTGTCTCTATTAAGGGGGATGCAATAAATAAATAA
chr02	24946851	chr02	10.54	TGAGCAGAGAAAGCATGTCAAGGATTTCATAACTTGTCGCATTTCTAGGTTGTTAGAAGCAAGTCAATAACATTAGATGAACAGAAAATAAATTTAGAGGA
chr02	23614585	chr02	12.05	AATTCTTGATATTTCAACCGCTTAAATTTTGAAATCCAAAAATATAATAACTTTGACGAACAAAAGAGAAAGATAATATGTAATTTGTTGCAAATAAAAAG
chr02	22862579	chr02	14.68	CCACCTAGGTACAAATAGAAATTCAGTTTTTCATTTTTTAGATAATTCAACACAATACAACTCTTTCAGAAAAACAGTTAATGAACCTTGTCCCTTCAAAT
chr02	26146470	chr02	16.21	TTTTGTTGTTTTTAATTAGAAATTTTGAGTTCATTAATTTTTAGAATGGATATTTTTTTGTGAAGGAGTGCGAATCTAAAAAAATCCGATAAGTAAATTTA
chr02	25723027	chr02	19.6	CATACACGTAATATATGTAAATTATTTTATGTGAAATAAATTAGGAATATATAAATTATTAGCAATAAGAAATAATCATTATAGTGTAAAATTTAATTTAT
chr02	21531687	chr02	21.27	TATTATTTTCTCTATGTAATTATATGCATAGATAAGTTACAAGAGAACATACGTATTATTTTGTGCATGTAACTATATGCAAAGATTAGTTATTCATGTAT
chr02	21542725	chr02	22.2	AATGAAAACCAGTTTCGTGTACCTATAAAGACACTTAGTAAAAGTGTTAGCACTAAATAAATATGAATTAAAATAAATGAATCAAATAGTAACTTAAAAAT
chr02	26802929	chr02	22.41	AAATATATGGTTACGTAACAATGAGAATTTTATTTGAACCTCTACTAACAAGTGTAATCTTAAAATATATGATTCTGTAAGAGTGGAAATTTTATTTTACG
chr02	22104177	chr02	25.47	TGCGTCTTGCTTCAATGGCCTGTACTATTCAAATGCACGAGTGGTAAGAACAAGCCATAAAGTAGTTTCTATATCCAAGGAAAAAGTTTCCAACTCCGTAA
chr02	27073013	chr02	26.15	CATGAGCTTGAAGCAAATGTGTGCATTTGACTATTGTAATTGAAAAGATGGATGAATGCATAATGGGTAGAGCAAATAAGTGTCATGTACATTTTGCCAGA
chr02	28045969	chr02	26.97	GACCATGTAAATTAGTATGGTTTGGTGTAATAAACACTAGGTGTGGGTAAGCTTTTAACATAAGGAACTCTATATGACACAAAATTCCCCCAGAATTCACA
chr02	28207781	chr02	28.67	AAAAGGGGATTTTTGACCAAAAAATATTAATGGTGGGGGATTTTTTGACCGAAATATTAATGATAGAGACATTTTTAATCGAACCACTAACGAATAACATT
chr02	22353471	chr02	28.79	TAAATTAATAAAAGAAGAAACTATTCTTTAATATAATGTTTCCACATTCTGCGAACTATTTATTCCACGACAAGCATACATTTCGTGATCAGATGACCAAA
chr02	27559241	chr02	30.21	ACCTATCACTTGGAAAAAATTGTTGCCTGATAATGCAGTTCAACTGTAAAACTTTACAAACTCAACTGTTTGCAGTTTTTCGGGTGAACTACTTCACAAAA
chr02	28665973	chr02	32.82	TCCACACAAGTCCGTAGACCATTTTATAGTTCCTTCCCAAAAGAGTTGCTGCTAGCCAAATATTTGTCAAGAAAAAGGAAAAACAGAATTTGTAGACAGAT
chr02	28984131	chr02	33.72	AACAATTACAAATTATTACATTTTAGAAATGTCACTCAAGCTAATGTCATCTTTTCACATCACTAGATAATACATATAAATCTTATTTCATATATGTGTAT
chr02	28970615	chr02	34.04	CATTCTTAATCACCAGGTTGCTAAATTCCAATACTGCTGTATGGAACTTTCTTTCTGATCTAAGGGGTAAAGACCCCAATCATATGATTGATATGAGCTTT
chr02	28552664	chr02	34.34	AGTTGAAATATGTTTCTTCTCAATTGAATATGCTAGAAGCGGTGTTTGTTGGAGACATCCGCTTTTAATAATGTAGAAAAAACTCAAATGCTAGCCATAAT
chr02	29536508	chr02	34.46	CAAGAATGTGGAAGTTTTCCTACGTAAAAATTGTTAGTCTTCCGGTGATAATTTTTCAAGGCAAAAGATCACCTATAAATTCATTTAAACTTTATTTAGTT
chr02	29259312	chr02	35.02	TTTCTTACGAAAATGTTTTAAAATTTGATATATAATATAATACACCCAATATATAATATTATATAAAAAATTATAAAAGACATTTATACATCATATACATC
chr02	29879855	chr02	38.81	AATCTTATAATCTTAAGCATATCATGTAAAAAATTAAAATTTAAAAAAATAAAACATCATAGAGTAACATTGTTTCTCGTGTTAATAACTTGCTCTGCTCT
chr02	29853983	chr02	39.01	CTCTGAGGTAGTTGGTTCCATAAGCATTTTAACCATTATGTATTTGAAAAAAAAGAGCAGAATAACATAAGTTTCGCTGAAATAATGCATGCGGATTGTAT
chr02	31604047	chr02	40.89	TCGAGGCAATAGGGTCAACTAAATGTATCAGTCTAACAATCGTTACAGTCGATATAATGTAGCTTTCCATTTAGTTTTTATTTATATATGATGTCATAACT
chr02	30552803	chr02	41.56	ATAATAGTATTTGATTACATAGAACAAGATATACATAAGTAGAGTATCAACTTATATTGAAGAGATCATGCAAGTAAATTAATAACAAAAAAATGTAATTT
chr02	33044152	chr02	43.2	TTTTTGGATCAAGATATTAGTTGATGGTGAGATTCGAATCTAATAAGTTTATTTTTTTTCTAAACTATGTTAAAGTATTTGTCTATTTCATTTTAAAACTT
chr02	31710476	chr02	43.23	TCACCTGTTGGTTGATCTTGTTGCCACTTTCATATGTTGTGTTTTCTTACTAGTTGAGTCTGACCATGTTAGAGTTAGTTGACATTTGCTATTTAACATGG
chr02	33044053	chr02	43.3	GTTACAACATATAATCATATTTAAAAGTTTAAATTATTAAGTGAATTTCATTTTTATTATTATTTAATTATGTTTTTCATATCCGCACATTGGAACTAATT
chr02	31551108	chr02	43.72	TATATCATTAATTAAATATTTGTACGATTCTGTTAGTAAGTTCTCCCTTTGTCCATAATTACTTGTCCACTTTTGAATTGACACACCTATTAAGAAATCAA
chr02	31931655	chr02	44.05	AAGATATACTTGGAAAATATACTTCGCATACTTTGTGAAAGTTTTTCCATATTAAAATAGAATTTTATAAGTAACTGATCAATCAAGCAATTAAATGTCAA
chr02	32507002	chr02	44.24	CTGCAAATATTTCTGGCAGCTGGATCCCCACATATTGTAGAAAACATAAAGTTGTATGGCCCTCCCGCCCCACAACATGCAACTAAAGCTCCTTTTCTAAA
chr02	35333829	chr02	44.27	TTAAGGCGTAATACATAAAAATACCCTTTATCTTGGCTTCAAGTATCAATTGACATTTATGTCCTCTAATTTTGTGTCTGCACAAATAGATATTTAAATTT
chr02	31682196	chr02	44.89	TAATAAAAGCCAAGGGAAATCCATTAATTATTTTTTCTACACTTTAAGTTATTTACTAAATTAAAGATGTATATAATCCTTTTTTTTCCTTTTTAAATTGG
chr02	32159748	chr02	44.99	AGTTGTATCATTCTATATACATCCTTGATGATAGGCAGCTAGAAACATGAGTTTTAGTTATATTTCATTTTTTTTATTTACTACATTTTAATCGTGATTGA
chr02	34769941	chr02	45.09	ATTTGAAATGGAAACTACAATAAAATATTGATGTGAATAAGCAGGACATAGCAAAATGTATCATTGAGCAAGACATAAATACTTCAACCTTTGGACTACTA
chr02	33041344	chr02	45.33	TTAGTTAAGAATACATATTCATTTTTAATATATTTTCAAAATATAGTATCGATCTTAGGTACCAAACCTGATACTAGCTTTATTTATAAAGGCACATATTC
chr02	33043827	chr02	45.52	GTATAATTATATTTGTGTAATCAAATAGTACGCATGCAGTTACACTATGACAAATAAATAGATCATAAATTTTTTTATATTATATAATTACTAAATAATGT
chr02	32167434	chr02	46.17	GTCATTTTCTAAGTAAAAATCCCTAAAACCCTGATCTTTATGGTCATAGTGAAGCAATTGAATTTGAGGAATAATAGGTATAGGAAAATTTCATCTCTATT
chr02	33045680	chr02	46.53	AATCTACCCCAAATATAGGGACAGTGTTTTAAAATTTCTCTGCCACGATTTCTTTCACCATCTTATTTATTAATAATGAAAATGAATAAATGGAATAATAT
chr02	32621693	chr02	46.67	ATATTAAAAATGTTCCATTTTTTATAACTAATGCGTTTGGTCAGCTTGGGTGCAACTTGACTCTTGCAGGGTGTATGTCTTACCTCCTACCCAGTAAAGGT
chr02	32086531	chr02	46.79	CTGAGCTCCCATGTTGAACACTGAAAAACACAGAACTATGGCTAAGCAAAATAAATAGCAATGTTATGAGCTCTTATGCCACTCAGACAAATTATTAAATA
chr02	33212220	chr02	47.81	TACTCTCAATATAATAGTCAAGGTACAAATAAACTGTTTTATTAACGCAACCATTATAAACAAAAATCTATAACAAGCTTTTTAAGAGGTACGAAGTAGTG
chr02	32910598	chr02	47.98	GAAAGGTCCTTCGCTCTTGAGTTTCTTGTCGTCTCCGGATGTCCACACTTTTGTATAGAATAGTTACTTGTACAACTCCTTCTTTGACTCTAACAAACTAG
chr02	34546306	chr02	48.3	CTGTAAGAACATGTAGGAAATCAGAGACTGATTTTTCTTTTTAAATGTTGAAAATCAGAGACCACTTAAGTCAGAATGTGATTATAGGCAATCACGAAAGT
chr02	34370593	chr02	48.31	TAAATAATCAAGTTTTGAATATGGCACTTGTTTAGTGGATTTTTGACTCTGTGTGCACCCATTTTTTAGATCCTGTGTGAAATTAAAATTGTTTTGTGCAC
chr02	34791943	chr02	48.37	TATCACATTCACCATCAATATTTTAATTTGCTCGTAACAAAACTGATTTAAGTAATATAATTATCTAGCAAAAAATATTACTTAAATTTAATTTTAATACA
chr02	35404425	chr02	49.12	GTTAGTTTGTGTGTAATTCGATTGATTTCACGGGATGTTATCTCCTACCAACATAGATATTAAGTAAATAGCTTTATCCAACAAAGTTTGGAAAAATAAAA
chr02	34917739	chr02	49.83	ATCACCTGACCTAGTTCAACCTCAAAAGCTAGTTCGTGATGAGAAGATTGCTCAAATTCATAAAAATACACCATCAGTCTATTCTTCAACTAACGTGACAC
chr02	35140421	chr02	51.5	TGGAGTAACATTTTGACAAAAAGAATGAAAAGATTAAAAGAGAGAGAATTTGAAGGTTACCCATAATTTCTTTTTCTTTTGGAATAGAAATTGCTTATGGC
chr02	35548989	chr02	51.97	GTAACATATGATATGTTGCTTCATCAATATTTTGAAAGAAAAAACAAGAGCTCACACGAGCTCTTTTTTGGATACAATATTTCGAAAACATGATTGAATCC
chr02	35948029	chr02	52.37	AAAAGGAATCGGATTCTTCTCTACATTTATTATTCCTTGTACTAGTTTTTGATCGTTTTATATCATGTCAATTCTTTTCATTTTAATTTATACGATGATGT
chr02	36649008	chr02	56.82	GTTCAGTAGGCAATATACCAAACAGAAGAGTTGAAGACACAAACAACTAGGGAAGTCGAATAAATAACCAACAAAAGATTTTAAGAAAGAAAACAACTACG
chr02	36596401	chr02	56.84	TATCTATGTACTTTTTTTTCTACTTTTTATATTTTTATAAGTGTCAACCTCTCAAATAGCATAAGATAATGGAGATTCAATAAATGATAAATGATCAGAGA
chr02	36814271	chr02	57.89	ACTACAAGCATAATCATAGGTATATTAGTGATACAGTTATACATAATAGGTATGCTAGCCTCTCTATCTCCCCTTTAAAGTTCTATCTATCAAATCATCCA
chr02	36712013	chr02	57.9	TTAGACTTTGCACGTGCTTTAAGAAACAATGATCAATATGAATATTTTATCATAGTGCCTATATAAATTGATGTTTAGTCTTAAATTTTGAGAAATATTAT
chr02	36709622	chr02	57.98	AAGGAGTGGAGACATAATAAAGGTGGAATTTATAAAATTAGTTGGGGCAGTAAGGTGAATAAAATAAATGGGGCACTTCAGAATTACAATCACTATACTAT
chr02	36888242	chr02	59.06	GTGCTCCCTACCAAGTACCAAAGACAATTTCATACTCATGGCTCAAATATGAAACCTTTGAATAAGAATAAAGAAATACTTGCAACTTCACCAACCATCTG
chr02	37037357	chr02	59.71	ACATTTGTCACTTTCATGGTTAATTTTTAACTGTTACAGGCCGTTTGGTTCAATGGATTTGGTGCATCATCCCTGTATAAATTTTTAGGATTAAATTTATC
chr02	40836124	chr02	59.97	ATATACAAATCTGGTTAAGAACGACAGTACTGATTTCAGTGAGTGAAGAGCTAAAGAAAAGAAAAAGTACCTGAATCCACTGATCATTCATCCTTCCTTCA
chr02	37844249	chr02	60.13	CAAACAGAATTGAGAAGAATTCCTCAAGGGAAAAAGAAGAGTAACAGAGATTGATTTGAAAGAAGTTAGCTACCTAAAATTAGTAATTAAAGAAACTGTGA
chr02	37339690	chr02	60.55	AAAGCATGATGCAACAAATCGACGAGCTAAGGGCTAAGTTCATTTTTCTTCTGTTTTCAGAATGAGTAAAGAGTATCCATTTCAACAACTCGGAAAAGGAA
chr02	40257673	chr02	60.73	TAGTGATCAATTCAAATCATATCGTTATGTTGAAACTGTTTTGAATTGTGTCGTTTGAGTATCCTATGGAATATCATTTGTGTTGTCACTATTAATGACAA
chr02	38406126	chr02	61.05	GATATGAAACAATTATTTTCAGTAGGCTTGGTTTTAGTTTTGCTCGTACGATTCATCTTAGGATATGAAAAAGTAGTTATATTGTTGTCATTTACCATGAA
chr02	40309295	chr02	61.07	GTCATCACTCATGAATGTACATGTAAGTTGTAATGAAACAACCGGTACTTAAAAAAAACATATATAGATTGTGATTGTTATGTAGGGAAAAACTGTATTTA
chr02	40257642	chr02	61.08	CCCCTTGGCATTATGTGCGCTTATGATTAATTAGTGATCAATTCAAATCATATCGTTATGTTGAAACTGTTTTGAATTGTGTCGTTTGAGTATCCTATGGA
chr02	38662696	chr02	61.16	AAGTGAAGCAGAAACTTCCTTTTCAAATTGGCAATCTCAAAAAAGGAGCGGAACTTTAGCAACTTATAGTCTTGGAATAATATATGTTGGAATGACTGACA
chr02	40370007	chr02	61.31	TTAATGATTTATGCAATTTTTAATAGCCCAATACTAATAAGTAAATTTTACACTTTGCTTATCAATTACGATTTAATTTTGAAAGCCCTTAATATTTACTC
chr02	38384379	chr02	61.43	AAACAAGGAAAGTAAAAGAAAACTTTCTCTAACGTTTGATTATGTAATTTGTACTTTTTAATGTTTACTATATTACAAAATCTTCTCTTATTTAAATTTAT
chr02	38058262	chr02	61.59	TAGTTATATTGTACTCTCCGTCATAATATCCACTATCCTTTATACCTGTGCTAAAAAAAAACTGAGATCACTTATCGAAGTCAAATTTTACAAGTCGGGTT
chr02	38467213	chr02	62.31	AAGAAATAAAAATAAAGAATCAAATGAGATTCTATACCAAAAGTAAAATAGTTCAAAAACTTAGAAAATCAGAAGGAATCAATACAATGAAATTCTATACC
chr02	39084656	chr02	62.62	TGTCGTTTAACTTGGTCTTAATTGACATTTATGTGCATTATCCGATTTACAAAAGGCAAGCAAGCAAGTTGTTGGCTTTCATTTCACTTTAAACCAACGGC
chr02	37436729	chr02	62.74	TGACTGTCCCAATCTTCTTGTGTAAAATTTCTGGTTGACAATTAAATTCTTATGGAATTTTGGTTGTGTTAATGGAGAATTTGTGGCTTCTTCTTTTCTTT
chr02	41317102	chr02	62.92	ATAATTAAGAATGGAATAAGGCATAGTTTAATAGTGTTTGATTGAAATATCCTGACAAATTTATGAGAGTGATTATATATGTTGCTTTATTTTATATTTTT
chr02	41494786	chr02	63.44	TAATATTAAATTACCTTTATTATGAAATTCAAATTCTTCTATGTTGGATACTAAAAATATTTACACCAGAAATATACCATAATTATGCATTGCTTTTTAAA
chr02	41317652	chr02	63.44	CCCCTAATTTCATTAATCTTTCTTATTCATGATTTACTTTTTTTTGTTGCCTCTCTTTCTTCATAAGCCGTATAGAGTTGCAATCTACTCAACAAGGTTTG
chr02	39105480	chr02	63.5	CTAATATGAGTGTTTTATCACAATATTTTATTAATTGATATATAATTTTAAATTTTGCGAAAAAAATTGAGAATTAAGTAATTTATTATGAGAGTAAAACA
chr02	41759864	chr02	64.09	TAATAGCCAACTTCAATTTATTTGAAATTGAACCTTAATTGTTGTTGTATAGAAAATAAAGTAATTCTGAATTTGAAGTGTAATAGGATAATATGAAAAAT
chr02	41484243	chr02	64.22	TGATTTCATAAAGTGGATAAGTAATGTTAGACATTCCAAAATAGTATAACGGACAATATCCAAAAATAGAAGAGTGAACAACAATTTGTATAAATCCAAAA
chr02	41328990	chr02	64.25	TCTGCATGCACAATATATATGTTTTGAAGAAAGGTTTTAGAGTACAAAAAATGTGTGTTAGTTTTATTTATACTTAACATATTTGAGGATGAAGTTGAAAG
chr02	38997990	chr02	64.52	AAATCTATGCACCAGTGTAATCTGAACCGTCAAGATGAATCTAGAAATTGTACCAGATAGGAGTTTTGACTGTAAAAATTGAGAACATAGTTATCCCACCT
chr02	41649200	chr02	65.26	AGAAACAAACCTTGCACTGGATAAGTTTCCATAATATTTCTCCATATGAGAAAGTAATACCATAAACAAATTGGCTATTTGGTTTAGAGTTACTGATAAAC
chr02	37703623	chr02	65.34	ATAGATCACGATAAAATAAGGACAGTTTATGCATAAAACACCAGTAACAAGCGTGTGTACTATATAATAGAGAGAGAGAGATACCAATTAAGATAAGAATT
chr02	41931822	chr02	65.38	TTGAGATTAAACTGGAAAGAGTATTATATCATTTCCCTCTCATTTCCCCTTGTTCTTCATCACTGCTTTCTATAATACTATTTGTTGGAACCTGAAACAGA
chr02	41832708	chr02	65.44	TAAACTTAAAGAAATAGCAATAGAGCGGGAGTGCAGGACTAATGATATGCCGTGTGGGGTAGAGCAGATTGAAATAATCTTTTTAAAAATAATGTATGGCG
chr02	41435054	chr02	65.73	TTTGACGGTACTTGTCATTTGCAAATTTTTTTTAATTTGTAGTGCCTTTTGTCATAAGGGACTCCTTTTGTCCACTCTGCGCATATGAGGGTCAAAATTCA
chr02	38332641	chr02	66.26	TAGAAGAAGATCTCTTATTAATTTGACATGCAATTTCTAAGAGGAGTAAGAGAAGAAATACAAACACAATTGTCTAATGTATGGTTTAGAGAATTGTAGGG
chr02	38849452	chr02	66.4	TTATCAACTCTGCTGACCAAACAGAAATTCTAGAATCTCATATAACCTTATTTTTAGAAGGACCAATGCATATAATTTTAAGAACATAAATCTAACAAACT
chr02	42025585	chr02	66.55	AAGGTATATACGACCTTTATAGCTTCCACATGTACTAATCATTAAATTACGCAATATCATCATGAATTCAAATTTTCTTTTCTGCACTTTGCATCTCACTC
chr02	41644893	chr02	66.99	AAAGATTCTCTTTTAGTTTTTCCTTTCCATGGTCATTAACCAAACATAGGAGATTTGAACTCACAGATTCACATTGATTATAAATATATATAAATGTGTTA
chr02	42103327	chr02	67.5	CACAGTATTTGCAGCATTCTATAGTTTGCTTCAAATGCAGAGAGCTTCTCTTAATATGTTGTATGAATCTCAATTAGTTGCCTTTGCATCTTCTCCTGCTT
chr02	38339916	chr02	69.52	AAATATACTAAAATGTTCTATAATATTGTGATATTTTGTATAAGCGTGTAGCTGTCCCTTTCCATTTATACAAATGATTCCTTCTCTTTCTTCATAATTAT
chr02	39209626	chr02	71.25	GATAGAGGTAATATCAAACAACATTAATGGACATGATTTAATCCATTAAACAACATCAAATGGGGGAACTAAGCATGAATTTCATATTATTAATTATCGTA
chr02	43299302	chr02	74.26	TATAAATTAACATATCTAACCTCACATTCTTATCTAAATATAGCGTAAAATTCGAGGTTAACAGAGTAATTTAGGAAAATTGTACTTGTTTATTCCAACCG
chr02	39639010	chr02	75.53	AGCAACTCAGTGTTTTATTTTATACTAATATATACTAGTGAATTTGATCGCGCTTCGCGCGATTATAAAATACCTCATTAATTTAATAAAATATTTTTTAA
chr02	43800245	chr02	85.74	TAATGCCGATAAATACTTTAGCACTCTTTTATTAATGTATTTATTTATTACCGCTAAAAGTTATTTTTATTGTAGTGATAGTTGAAAAATTGAAACAAAAG
chr02	43821260	chr02	85.75	TATACTTTGGACCATTCAAATTAATCATGTTTCAATTCTAACTTTATCTACGGTATCCAAAGTAAATGGGATTCTAAATTGAGACAAGTGAATAAAAAACA
chr02	43883491	chr02	85.75	TACACCATGTTAAACTCAAACCTCTATATATTAAAAAATAAATTCACTGTAATTATTTCTATATAATGTAATTAAAGGCCGAGAAAAAACTATCACATTTA
chr02	43990548	chr02	88.83	TTATCTTAATCCCGATTCAATGTAGAAAATAACACTTATATTTTTGAAGTGTTAATTTATATAGTTTGATTTAGAGTACATGAAACAAACTAATTAGTGTT
chr02	44254752	chr02	89.01	ATTATCATCATCTCATTTTTAATTATTTCCTGAGGTGGCAATTAGTTGTGGATTAAACTTATAGACTTTTTTTCATCACTAATACGTACGTGCTTAGCTAG
chr02	46236873	chr02	92.56	AAACATATAAACACGTTTAAGCTTATCTATGCTTTTGGTAAACACTCAAAATACACGAGTCAAAATCAGCCAAAAATCATTTTTTTTAGAGATACTTTGCC
chr02	44757465	chr02	95.26	TCTCAAAGTAAGGGTCCTAATAACTTCTTCCTTTCAATTCAAATCGACGTTATAGTTTATATATATATGGTAGAACTAACGAGATCTTTTTCCTTAAGGTT
chr02	45641260	chr02	95.41	CCTTCGCATTTTCCCAGATGGAAAATCCCAATGTGTTTGTTTACAATGCATTAATAAGAGCTTTTGTTCATTGCCACAGCCCACATAAAGCATTACTGTTG
chr02	45522508	chr02	95.42	AGTAAATCGGCTTCTATACAATACCTTACAAACTGCATAGAAGATGCAAATAACATTAGATAAATTCGGTGTAACGAGTTTGACTGAGAGGGTGTTGGGAG
chr02	45609047	chr02	96.43	ACTTATCTATAGTTGATGATTCTTATGAGTATAGTATAAAATTATTATTTAAAAAAAAAATGTTATTCTTGTAAAAAAAATTGATTTATCAAATGAAGCCA
chr02	47907511	chr02	100.87	GCAGAGCCCACATTGTGAAGCTTTCATATAGATGAATTGTGTTCATGTTATTGTGCATTTGTCATTGTTATTAGTAGTCTCATGATACATTTTTATCGTTT
chr02	46631696	chr02	101.31	TTTGAGAAAAAAAAATATTTTTATTGAAAAATTAAGTGTTAAACAAATCAGTAAAAATGTTTTTCTTACTTTTAAAAAAAATAGAAGTAGAAACAAAAAAA
chr02	46895400	chr02	103.59	TAGTGAAGGTATTTGATTAATTGAGAGTGGAAACACATATCTACTTTTACCCAGAAAATTAAGAAAGAGCTCATTTTACTTTAGAATAGGGATCATAAGCA
chr02	46993059	chr02	104.3	ATAAATCTTTTTTGTCTATATCTTTTCCTTGGTGCCCTTGTGTGTCTTTGTAAGCTAGATTTTCTAGAGCTGATAAGTTTTGTAAGTATCTTTGAAAGCTA
chr02	47090013	chr02	106.82	CCACTCCCAATTTATTAAAAATATAGTAATTATAAAATACTATTTGTTTACACTTTATATATTGCTCAACTTTACAAATAAAATATTATATTGTCGTTTAA
chr02	47204107	chr02	106.82	TTACTCATTTTATGATTTTACAACAACAATAGTGGAAAGTTTTATTTAAATTATGTCTTTAAATGTTTTTCTTAATAAGTGTGCATTGCTCACAAATTCAG
chr02	17226890	chr02	5.17	TAATGCTTCTGAAGTATGAGCAAAAATCAGTGATTTACTTGGAATTACAGCTTTTATAGTTTATTTATTCACAGTGAAGCTTATACCTTTTATTTCATTTT
chr02	5554583	chr02	20.49	ACCCTCCATCCACTTTTGGTCTATAAATAGCCCTAACCTATTTATTTTGTATCATGATTTACCTCAAACTAACACCCTAACCCTGATGGCTTTTTGCAATT
chr02	5554587	chr02	20.49	TCCATCCACTTTTGGTCTATAAATAGCCCTAACCTATTTATTTTGTATCATGATTTACCTCAAACTAACACCCTAACCCTGATGGCTTTTTGCAATTTAAA
chr02	27069595	chr02	34.5	GTCGGCTCCATTGTATGATTAACATGATCAATTGAAGGAGGAAAATTATTAGCTCATTTAATTATGAATAACACAATCAAGAAATGAAACAATAAAGAACA
chr02	27365787	chr02	37.2	TCTTCGAAAAATATTTTTCATCTCACCAACTAAACATCAAAGAAAACATTGTTACTTTAAAAAAATGACTTCATCATACCAAACATTACTTAACTGAGTTA
chr02	27853361	chr02	37.2	GTAAACAATAAAATGTAGAAAAGTGGGACATACCATGCTGCTGCAATTTTGCCCAACTGGATTGTGCTTAAAGAAATGAAACCGAGCTCCAACAGTCCTAA
chr02	33679688	chr02	46.8	GAGAAAAAGAAATATGACCTCCAAAGTTTAATAGCAAGGGTAGATATAATCCAAAAATAAAATCGAGGGTAAATATGAACAATTTCTCAAAATAGGGGGAT
chr02	33803140	chr02	48.96	TTGATGTTATGTTGTTACTGATTCGTTTTCTATATGTTCTGTAATAATTTCGTTATTATTTGTTATGTTTGCTTTGCGTTTCTATATTCTTTTTAATATTA
chr02	34135546	chr02	49.11	CTAATACCTCTCATAATTCTAACCAGCTACCAGTCGACCACTTAATGATTAAACAACAACATGGGAGAGATTTTATCATGGGAAAAATTAGTCCTTTTGCC
chr02	35249335	chr02	49.28	TCTCTAATGTCCTCTTGAATCAGGATGGAAGAGAATGAGTAAGATCTTATCAAGTGAATCATCGCCAAACTATTACAAGGAAGACAAGATTACAGAGGACA
chr02	34224612	chr02	49.38	TCCTGACCAGCAAATAATATATTCTCTCATAAATATTCATAATTATTTGTTAATTGGTGCAAAATTTTATCATCCATATTGTAGATAATCATAAAAACTAA
chr02	35680000	chr02	53.02	AGAAAACAGCAGTGTACCAAAAAAGAAGATGAGAAATAAAAATGTACTTAACCTTAAAAGGGAACACAGAAAAGTACTCAAGAAGTCCAAATACTTGTAAA
chr02	37369601	chr02	62.89	CCCTTTATAAATGAAAAGCCAAAAGATTATACATTTTTGTTTTCTTGAAAGTTCAAGGACACACAAGACTGATAAAAGAAGAGAGGCTATATCATAAGATT
chr02	37556332	chr02	62.89	ACAATATTTTTATTAGGTCCAAAAGTGCCCCTGTTATTAATAGTTTGGCCAAAAAAATGCTAACAATAGCAGCATTTTTGGACCAAACTATTAACGGAGGA
chr02	38899109	chr02	67.56	GTGTTGTATCACGATTATTGAAATTTTAAAATAAGAATTGATTGCATTTAAAAAGAAGCTATTGTTCCAAACTTCCAATTGACGTTCTTGATCACAAAATA
chr02	38644731	chr02	69.85	TAATAAACACACTTTTAATAACGTTAATGCGTTTGTCTTTAGTAAGTCTCATGTGCAATCATCAAAAGCAGTAATAATTGTATCATGTATAATAGGGTTTT
chr02	44553201	chr02	81.96	GTAAATTATATCGTATTTATTACTTTTGGCAATAAAGAATGTCAAATAATTTAAAACGACGCTTATTTTACGACCGAGCATTTGGAAAAAATCATAGAATT
chr02	46535544	chr02	102.41	GATCATATTTGTCATGTAGAATCATTAGTTGTCACAGTGTAATGAACAGAGAAGTTATATTTGGATCATGAACTTATCGTTCAGAAGGCGAAAAAATAATA
chr02	46535550	chr02	102.41	ATTTGTCATGTAGAATCATTAGTTGTCACAGTGTAATGAACAGAGAAGTTATATTTGGATCATGAACTTATCGTTCAGAAGGCGAAAAAATAATAATAAAG
chr02	47961053	chr02	102.69	GGAATCAAGCAACCTATGATGGGGTAAGTTGGCGGTCCTTCAAAGCCTCTAGCACCTTGCTGGAATTGTTCAACAATGACATACGTTAGATATAGAATTAG
chr02	47933050	chr02	104.42	AAAAACTGCAACTCTTCAACCATGTCTGTTTTCTGAAGATACTTTTTTAATGGACAGGTAAGCAAAAGGAACGAAAGAAGCTTCTTGAAGTGCCAAAATTT
chr02	46361129	chr02	105.13	TACATAAGAAAACAATTGAGTATATTCAATTGATAGTATGTCCTTCAAAAATAAATTAATTGTCTTGTTGTAGAATATGCCACATATATCGAGATTCACCT
chr02	17226897	chr02	5.17	TCTGAAGTATGAGCAAAAATCAGTGATTTACTTGGAATTACAGCTTTTATAGTTTATTTATTCACAGTGAAGCTTATACCTTTTATTTCATTTTGTATATA
chr02	27069619	chr02	34.5	TGATCAATTGAAGGAGGAAAATTATTAGCTCATTTAATTATGAATAACACAATCAAGAAATGAAACAATAAAGAACATACGTCAAGGAATTGTGAGTCTCA
chr02	27069609	chr02	34.5	ATGATTAACATGATCAATTGAAGGAGGAAAATTATTAGCTCATTTAATTATGAATAACACAATCAAGAAATGAAACAATAAAGAACATACGTCAAGGAATT
chr02	27069606	chr02	34.5	TGTATGATTAACATGATCAATTGAAGGAGGAAAATTATTAGCTCATTTAATTATGAATAACACAATCAAGAAATGAAACAATAAAGAACATACGTCAAGGA
chr02	29155892	chr02	37.2	TCATACCTACTGGACTCAGAGGAACTTAACTCTTCTTGCTGTAATTGCGCTTTAAAAACGCGATCTTTTTCTTCTAACTCAACCATTTTGACTCCAGAGGA
chr02	29155311	chr02	37.2	AACAAAAAATGAATGTCAAGAGTGATGGAAATATAAAATTTGGAGTTGTTAAATGCAATATAATCTCTTGTATCAGAAACTTTACAAGACATAATACAAAA
chr02	29146344	chr02	37.2	TGAGGATAAATAAGAATATCAAATCCCTTTGCAGATGATGTCATCTCTTCAACAGACATATCAACTTTATCAAGAAATCTATCCAACCATGAGAGAACTTT
chr02	29139405	chr02	37.2	AACAGAGACCGCTTATATCCCCATGAAGAATCGCCGACAAGGAGGCTTTATCCCCACTTTCTTCATATTTGGTACATAATTTTACCTTCGGAAACCAAACA
chr02	29126834	chr02	37.2	GTGATTTGTATAAAATGTTAGACAATTACCTCATATATAAAATCTGTCCAGAATTCTATGGGTTGAGCTCAAGATAATTTGAATTGAGTTTAATTTCAACT
chr02	29087404	chr02	37.2	ATTAATAGTTATGATAAATTTATAAATATTCACTAGCAAAGAGATCAAAAGGTGAATATTTCAATTAATTAAAGATTGTATATCTTAATCATATATCACAA
chr02	29076072	chr02	37.2	TTATTATTGATAAGAATACTTATAATTATGTGAGAGAAATGAAACAAATCCAAACGAGTTTAAGTTATATATACAACCAAAAATGATTAGTTAAAGGAAAT
chr02	29046495	chr02	37.2	TTAAATTAAGCTTTAAAAAAATAATCAGTTTCAACAAATCAACCATCAAACAGACATACCCTTAATGAAAATATACACTGAAATCCATCAACCAGAAGAAA
chr02	29045376	chr02	37.2	CTTAGAATCCTCCAGCTTTCCATTTCCATTTCCATCCCAAACTGATTTTGTAGAAGTCACGTACTCACTTGATGTCTTGCGTGTAAAGAAATCTGCATCAT
[truncated: 10,755 more rows]
